# Supplementary material for: Context-Aware Business Process Management
Source: Springer Nature journal article supplement (doi:10.1007/s12599-021-00685-0), 2021-03-02
Supplement: MOESM1 [file 18922520]

# **Context-Aware Business Process Management**

## **Method Assessment and Selection**

**Jan vom Brocke, Marie-Sophie Baier, Theresa Schmiedel,  
Katharina Stelzl, Maximilian Röglinger, Charlotte Wehking**

**Business & Information Systems Engineering (2021)**

**Appendix (available online via <http://link.springer.com>)**

## Appendix 1 – Literature review

We conducted a structured literature review to identify existing BPM methods (vom Brocke et al. 2009; Webster and Watson 2002). The review serves as foundation for the evaluation of the Assessment and the Selection Process as well as provides high-level insights into the applicability of existing BPM methods to specific contexts. Details, including all design decisions regarding suitable publications, search strings, the chosen timeframe, and the selection of relevant articles, are presented in the following.

We identified 102 BPM methods published in renowned journals and conferences related to the BPM discipline: *Business & Information Systems Engineering (BISE)*, *Information Systems (IS)*, *Business Process Management Journal (BPMJ)*, all journals from the *AIS Senior Scholars' Basket of Journals*; International Conference on Business Process Management (BPM), European Conference on Information Systems (ECIS), and International Conference on Information Systems (ICIS). While *BPMJ* and the BPM Conference are the prime outlets of the BPM community, *BISE*, *IS*, and ECIS are highly ranked IS journals and conferences with a BPM department or track. The journals of the *AIS Senior Scholars' Basket of Journals* and ICIS cover the top journals and conferences in the IS field and account for topical, methodological, and geographical diversity. We are confident to have covered large parts of the BPM and IS literature where BPM methods have been published. However, we do not claim completeness, as other publication outlets could have been included in our literature review. Besides, we decided to not include BPM methods from (text)books and/or consulting companies. We critically reflect on the implications of this design decision in Section 6.3, pointing to additional ideas for data collection. As stated in the research method (Section 3), we did not aim for a complete sample of BPM methods, but sampled methods for the validation and demonstration of our CAMAS method. From our perspective, the sample for the evaluation of our artifact is sufficient, as we applied the Assessment Process 226 times (two co-authors assessed each of the 103 identified BPM methods (102 BPM methods from the literature and the CAMAS Method) independently) and later on practitioners considered our results during the Selection Process as suitable and reasonable (Section 5).

We specified the search term (i.e., (“Business Process Management” OR “BPM”) AND (“method” OR “model” OR “framework” OR “tool”)) and the timeframe starting from 2014 to 2018. Besides the term “method”, we included “model,” “framework,” and “tool” as synonyms. While models are an abstracted presentation of an existing or future situation, frameworks are located at the intersection of models and methods (Verbrugge 2018). Tools, in turn, help execute methods (Dumas et al. 2018). During the development of our search strategy, we tested various search terms and combinations. Amongst others, we considered the term “technique” in the process of identifying the most appropriate search string for our literature review. As its inclusion did not have any implications on the results, we decided to exclude the term for reasons of simplicity. Since “techniques” are defined as detailed instructions related to the execution of method activities (Vanwersch et al. 2016) and therefore overlap with other synonyms, this result is not surprising. We limited the timeframe, as context-aware BPM has gained attention in the past few years, especially with respect to context dimensions (vom Brocke et al. 2016) and the goal of ambidextrous BPM (Kohlborn et al. 2014; vom Brocke and Mendling 2018). We deliberately focused on methodological papers independent of any context.

Applying the search criteria to the selected journals resulted in 2,725 articles. After duplicates had been dropped, 848 articles remained. For the final selection, we applied a multiple-coder approach to examine the titles and abstracts of all articles. Six hundred articles did not match the scope of our research, so 248 articles remained whose full texts were examined in-depth regarding their relevance to our research. We eliminated purely descriptive articles—that is, those that do not propose a BPM method but focused on other forms of inquiry (Lanz et al. 2016; Turetken et al. 2016). At this point, we included all method-

related papers independent of any context. The assessment of the identified methods happened later. In the end, we had 102 relevant articles. Table A-1 presents the number of articles per publication outlet, while Table A-2 lists the respective references of all BPM methods (including IDs) and A-3 summarizes the key ideas of each BPM method.

**Table A-1:** Results of literature review

| <b>Journal/ Conference</b>                         | <b>total</b> | <b>without<br/>duplicates</b> | <b>after title &amp;<br/>abstract</b> | <b>after<br/>full text</b> |
|----------------------------------------------------|--------------|-------------------------------|---------------------------------------|----------------------------|
| Business & Information Systems Engineering         | 710          | 266                           | 47                                    | 9                          |
| Business Process Management Conference             | 311          | 100                           | 40                                    | 20                         |
| Business Process Management Journal                | 724          | 208                           | 69                                    | 21                         |
| European Conferences on Information Systems        | 338          | 92                            | 28                                    | 12                         |
| European Journal of Information Systems            | 26           | 8                             | 0                                     | 0                          |
| Information Systems                                | 217          | 68                            | 40                                    | 34                         |
| Information Systems Journal                        | 92           | 15                            | 0                                     | 0                          |
| Information Systems Research                       | 4            | 1                             | 1                                     | 0                          |
| International Conferences on Information Systems   | 234          | 67                            | 12                                    | 5                          |
| Journal of Information Technology                  | 17           | 6                             | 4                                     | 0                          |
| Journal of Management Information Systems          | 17           | 5                             | 3                                     | 1                          |
| Journal of Strategic Information Systems           | 3            | 1                             | 1                                     | 0                          |
| Journal of the Association for Information Systems | 20           | 8                             | 1                                     | 0                          |
| Management Information Systems Quarterly           | 12           | 3                             | 2                                     | 0                          |
| <b>SUM</b>                                         | <b>2725</b>  | <b>848</b>                    | <b>248</b>                            | <b>102</b>                 |

**Table A-2: ID and references of all identified BPM methods**

| ID | References                                                                                                                                                                                                                                                                                                                                     |
|----|------------------------------------------------------------------------------------------------------------------------------------------------------------------------------------------------------------------------------------------------------------------------------------------------------------------------------------------------|
| 1  | Abe M, Kudo M (2014) Business Monitoring Framework for Process Discovery with Real-Life Logs. In: Sadiq S, Soffer P, Völzer H (eds) Proceedings of the 12th International Conference on Business Process Management, pp 416–423                                                                                                                |
| 2  | Accorsi R, Lehmann A, Lohmann N (2015) Information Leak Detection in Business Process Models: Theory, Application, and Tool Support. <i>Information Systems</i> 47:244–257                                                                                                                                                                     |
| 3  | Anastassiou M, Santoro FM, Recker J, Rosemann M (2016) The Quest for Organizational Flexibility. <i>Business Process Management Journal</i> 22:763–790                                                                                                                                                                                         |
| 4  | Antunes AS, Rupino da Cunha P, Barata J (2014) MUVE IT: Reduce the Friction in Business Processes. <i>Business Process Management Journal</i> 20:571–597                                                                                                                                                                                       |
| 5  | Appel S, Kleber P, Frischbier S, Freudenreich T, Buchmann A (2014) Modeling and Execution of Event Stream Processing in Business Processes. <i>Information Systems</i> 46:140–156                                                                                                                                                              |
| 6  | Atkinson C, Gerbig R, Fritzsche M (2015) A Multi-level Approach to Modeling Language Extension in the Enterprise Systems Domain. <i>Information Systems</i> 54:289–307                                                                                                                                                                         |
| 7  | Bala S, Cabanillas C, Mendling J, Rogge-Solti A, Polleres A (2015) Mining Project-oriented Business Processes. In: Motahari-Nezhad HR, Recker J, Weidlich M (eds) Proceedings of the 13th International Conference on Business Process Management, pp 425–440                                                                                  |
| 8  | Bala S, Revoredo K, de A.R. Gonçalves, João Carlos, Baião F, Mendling J, Santoro FM (2017) Uncovering the Hidden Co-evolution in the Work History of Software Projects. In: Carmona J., Engels G., Kumar A., Carmona J, Engels G, Kumar A (eds) Proceedings of the 15th International Conference on Business Process Management, pp 164–180    |
| 9  | Bergener P, Delfmann P, Weiss B, Winkelmann A (2015) Detecting Potential Weaknesses in Business Processes. <i>Business Process Management Journal</i> 21:25–54                                                                                                                                                                                 |
| 10 | Bisogno S, Calabrese A, Gastaldi M, Ghiron NL (2016) Combining Modelling and Simulation Approaches. <i>Business Process Management Journal</i> 22:56–74                                                                                                                                                                                        |
| 11 | Bolsinger M, Elsässer A, Helm C, Röglinger M (2015) Process Improvement Through Economically Driven Routing of Instances. <i>Business Process Management Journal</i> 21:353–378                                                                                                                                                                |
| 12 | Bolt A, de Leoni M, van der Aalst WMP (2018) Process Variant Comparison: Using Event Logs to Detect Differences in Behavior and Business Rules. <i>Information Systems</i> 74:53–66                                                                                                                                                            |
| 13 | Borkowski M, Fdhila W, Nardelli M, Rinderle-Ma S, Schulte S (2017) Event-Based Failure Prediction in Distributed Business Processes. <i>Information Systems</i> 81:220–235                                                                                                                                                                     |
| 14 | Boubeta-Puig J, Díaz G, Macià H, Valero V, Ortiz G (2017) MEdit4CEP-CPN: An Approach for Complex Event Processing Modeling by Prioritized Colored Petri Nets. <i>Information Systems</i> 81:267–289                                                                                                                                            |
| 15 | Breuker D, Matzner M, Delfmann P, Becker J (2016) Comprehensible Predictive Models for Business Processes. <i>MIS Quarterly</i> 40:1009–1034                                                                                                                                                                                                   |
| 16 | Cabanillas C, di Ciccio C, Mendling J, Baumgrass A (2014) Predictive Task Monitoring for Business Processes. In: Sadiq S, Soffer P, Völzer H (eds) Proceedings of the 12th International Conference on Business Process Management, pp 424–432                                                                                                 |
| 17 | Cabanillas C, Resinas, M., del-Río-Ortega, A., Ruiz-Cortés, A (2015) Specification and automated design-time analysis of the business process human resource perspective. <i>Information Systems</i> 52:55–82                                                                                                                                  |
| 18 | Cuzzocrea A, Folino F, Guarascio M, Pontieri L (2018) Predictive Monitoring of Temporally-aggregated Performance Indicators of Business Processes against Low-level Streaming Events. <i>Information Systems</i> 81:236–266                                                                                                                    |
| 19 | de Boer FG, Müller CJ, Schwengber ten Caten C (2015) Assessment Model for Organizational Business Process Maturity with a Focus on BPM Governance Practices. <i>Business Process Management Journal</i> 21:908–927                                                                                                                             |
| 20 | Debois S, Hildebrandt T, Slaats T (2014) Hierarchical Declarative Modelling with Refinement and Sub-processes. In: Sadiq S, Soffer P, Völzer H (eds) Proceedings of the 12th International Conference on Business Process Management, pp 18–33                                                                                                 |
| 21 | de Leoni M, Maggi FM, van der Aalst WMP (2015) An Alignment-based Framework to Check the Conformance of Declarative Process Models and to Preprocess Event-log Data. <i>Information Systems</i> 47:258–277                                                                                                                                     |
| 22 | de Pádua SID, Mascarenhas Hornos da Costa J, Segatto M, Aparecido de Souza Júnior M, José Chiappetta Jabbour C (2014) BPM for Change Management: Two Process Diagnosis Techniques. <i>Business Process Management Journal</i> 20:247–271                                                                                                       |
| 23 | del-Río-Ortega A, Resinas M, Durán A, Bernárdez B, Ruiz-Cortés A, Toro M (2017) Visual ppinot: A Graphical Notation for Process Performance Indicators. <i>Business &amp; Information Systems Engineering</i> 5:28                                                                                                                             |
| 24 | Denner M-S, Püschel L, Röglinger M (2018) How to Exploit the Digitalization Potential of Business Processes. <i>Business &amp; Information Systems Engineering</i> 60:1–19                                                                                                                                                                     |
| 25 | Derguech W, Bhiri S, Curry E (2017) Designing Business Capability-aware Configurable Process Models. <i>Information Systems</i> 72:77–94                                                                                                                                                                                                       |
| 26 | di Francescomarino C, Ghidini C, Maggi FM, Petrucci G, Yeschenko A (2017) An Eye into the Future: Leveraging a-Priori Knowledge in Predictive Business Process Monitoring. In: Carmona J., Engels G., Kumar A., Carmona J, Engels G, Kumar A (eds) Proceedings of the 15th International Conference on Business Process Management, pp 252–268 |
| 27 | Dijkman R, Wilbik A (2017) Linguistic Summarization of Event Logs – A Practical Approach. <i>Information Systems</i> 67:114–125                                                                                                                                                                                                                |
| 28 | do Prado Leite JCS, Santoro FM, Cappelli C, Batista TV, Santos FJN (2016) Ownership Relevance in Aspect-oriented Business Process models. <i>Business Process Management Journal</i> 22:566–593                                                                                                                                                |
| 29 | Fahland D, Völzer H (2018) Dynamic Skipping and Blocking, Dead Path Elimination for Cyclic Workflows, and a Local Semantics for Inclusive Gateways. <i>Information Systems</i> 78:126–143                                                                                                                                                      |
| 30 | Fdhila W, Indiono C, Rinderle-Ma S, Reichert M (2015) Dealing with Change in Process Choreographies: Design and Implementation of Propagation Algorithms. <i>Information Systems</i> 49:1–24                                                                                                                                                   |
| 31 | Fengel J (2014) Semantic Technologies for Aligning Heterogeneous Business Process Models. <i>Business Process Management Journal</i> 20:549–570                                                                                                                                                                                                |
| 32 | Fiorentino R (2016) Operations Strategy: A Firm Boundary-Based Perspective. <i>Business Process Management Journal</i> 22:1022–1043                                                                                                                                                                                                            |

|    |                                                                                                                                                                                                                                                                                                                           |
|----|---------------------------------------------------------------------------------------------------------------------------------------------------------------------------------------------------------------------------------------------------------------------------------------------------------------------------|
| 33 | Gailly F, Alkhalidi N, Casteleyn S, Verbeke W (2017) Recommendation-based Conceptual Modeling and Ontology Evolution Framework (CMOE+). <i>Business &amp; Information Systems Engineering</i> 59:235–250                                                                                                                  |
| 34 | Gómez-López MT, Gasca RM, Pérez-Álvarez JM (2015) Compliance Validation and Diagnosis of Business Data Constraints in Business Processes at Runtime. <i>Information Systems</i> 48:26–43                                                                                                                                  |
| 35 | Graupner E, Schewer C, Maedche A (2015) Visibility of Business Processes: An Information Processing Perspective in the Financial Services Industry. In: Becker J, vom Brocke J, Marco Md (eds) <i>Proceedings of the 23rd European Conference on Information Systems</i> , pp 1–16                                        |
| 36 | Hakim A, Gheitasi M, Soltani F (2016) Fuzzy Model on Selecting Processes in Business Process Reengineering. <i>Business Process Management Journal</i> 22:1118–1138                                                                                                                                                       |
| 37 | Harman J, Brown R, Johnson D, Rinderle-Ma S, Kannengiesser U (2016) Augmenting Process Elicitation with Visual Priming: An Empirical Exploration of User Behaviour and Modelling Outcomes. <i>Information Systems</i> 62:242–255                                                                                          |
| 38 | Heinrich B, Schön D (2015) Automated Planning of Context-aware Process Models. In: Becker J, vom Brocke J, Marco Md (eds) <i>Proceedings of the 23rd European Conference on Information Systems</i> , pp 1–22                                                                                                             |
| 39 | Heinrich B, Schön D (2016) Automated Planning of Process Models: The Construction of Simple Merges. In: <i>Proceedings of the 24th European Conference on Information Systems</i> , pp 1–28                                                                                                                               |
| 40 | Hotie F, Gordijn J (2017) Value-based Process Model Design. <i>Business &amp; Information Systems Engineering</i> 24:163–180                                                                                                                                                                                              |
| 41 | Imgrund F, Fischer M, Janiesch C, Winkelmann A (2017) Managing the Long Tail of Business Processes. In: Ramos I, Tuunainen V, Krcmar H (eds) <i>Proceedings of the 25th European Conference on Information Systems</i> , pp 595–610                                                                                       |
| 42 | Janiesch C, Diebold J (2016) Conceptual Modeling of Event Process Networks. In: <i>Proceedings of the 24th European Conference on Information Systems</i> , pp 1–15                                                                                                                                                       |
| 43 | Johannsen F, Fill H-G (2014) Codification of Knowledge in Business Process Improvement Projects. In: Avital M, Leimeister JM, Schultze U (eds) <i>Proceedings of the 22nd European Conference on Information Systems</i> , pp 1–16                                                                                        |
| 44 | Jouck T, Depaire B (2018) Generating Artificial Data for Empirical Analysis of Control-Flow Discovery Algorithms. <i>Business &amp; Information Systems Engineering</i> 60:1–18                                                                                                                                           |
| 45 | Khelif W, Ben-Abdallah H, Ayed NEB (2017) A Methodology for the Semantic and Structural Restructuring of BPMN Models. <i>Business Process Management Journal</i> 23:16–46                                                                                                                                                 |
| 46 | Khosravi A (2016) Business Process Rearrangement and Renaming. <i>Business Process Management Journal</i> 22:116–139                                                                                                                                                                                                      |
| 47 | Knuplesch D, Reichert M, Kumar A (2015) Visually Monitoring Multiple Perspectives of Business Process Compliance. In: Motahari-Nezhad HR, Recker J, Weidlich M (eds) <i>Proceedings of the 13th International Conference on Business Process Management</i> , pp 263–279                                                  |
| 48 | Knuplesch D, Reichert M, Kumar A (2017) A Framework for Visually Monitoring Business Process Compliance. <i>Information Systems</i> 64:381–409                                                                                                                                                                            |
| 49 | Krumeich J, Werth D, Loos P (2014) Conceiving a Method for Viewpoint-Based Modeling Using Recommender Systems in a Multiple-User Environment: Conceptual Approach and Proof-of-Concept. In: Avital M, Leimeister JM, Schultze U (eds) <i>Proceedings of the 22nd European Conference on Information Systems</i> , pp 1–16 |
| 50 | La Rosa M, Dumas M, Ekanayake CC, García-Bañuelos L, Recker J, ter Hofstede AHM (2015) Detecting Approximate Clones in Business Process Model Repositories. <i>Information Systems</i> 49:102–125                                                                                                                         |
| 51 | Lanz A, Reichert M (2014) Dealing with Changes of Time-Aware Processes. In: Sadiq S, Soffer P, Völzer H (eds) <i>Proceedings of the 12th International Conference on Business Process Management</i> , pp 217–233                                                                                                         |
| 52 | Lavikka R, Smeds R, Jaatinen M (2015) A Process for Building Inter-Organizational Contextual Ambidexterity. <i>Business Process Management Journal</i> 21:1140–1161                                                                                                                                                       |
| 53 | Lehnert M, Linhart A, Röglinger M (2014) Chopping Down Trees vs. Sharpening the Axe – Balancing the Development of BPM Capabilities with Process Improvement. In: Sadiq S, Soffer P, Völzer H (eds) <i>Proceedings of the 12th International Conference on Business Process Management</i> , pp 151–167                   |
| 54 | Lehnert M, Röglinger M, Seyfried J (2018) Prioritization of Interconnected Processes. <i>Business &amp; Information Systems Engineering</i> 60:95–114                                                                                                                                                                     |
| 55 | Leopold H, Mendling J, Reijers HA, La Rosa M (2014) Simplifying Process Model Abstraction: Techniques for Generating Model Names. <i>Information Systems</i> 39:134–151                                                                                                                                                   |
| 56 | Liesaputra V, Yongchareon S, Chaisiri S (2015) Efficient Process Model Discovery Using Maximal Pattern Mining. In: Motahari-Nezhad HR, Recker J, Weidlich M (eds) <i>Proceedings of the 13th International Conference on Business Process Management</i> , pp 441–456                                                     |
| 57 | Lindman M, Pennanen K, Rothenstein J, Scozzi B, Vincze Z (2016) The Value Space: How Firms Facilitate Value Creation. <i>Business Process Management Journal</i> 22:736–762                                                                                                                                               |
| 58 | Linhart A, Manderscheid J, Röglinger M, Schlott H (2015a) Process Improvement Roadmapping: How to Max Out Your Process. In: Carte T, Weidlich M (eds) <i>Proceedings of the 36th International Conference on Information Systems</i> . Association for Information Systems, pp 1–21                                       |
| 59 | Linhart A, Manderscheid J, Röglinger M (2015b) Roadmap to Flexible Service Processes: A Project Portfolio Selection and Scheduling Approach. In: Becker J, vom Brocke J, Marco Md (eds) <i>Proceedings of the 23rd European Conference on Information Systems</i> , pp 1–16                                               |
| 60 | Liptchinsky V, Khazankin R, Schulte S, Satzger B, Truong H-L, Dustdar S (2014) On Modeling Context-aware Social Collaboration Processes. <i>Information Systems</i> 43:66–82                                                                                                                                              |
| 61 | Low WZ, van der Aalst WMP, ter Hofstede AHM, Wynn MT, de Weerd J (2017) Change Visualisation: Analysing the Resource and Timing Differences between Two Event Logs. <i>Information Systems</i> 65:106–123                                                                                                                 |
| 62 | Maamar Z, Fati N, Sakr S, Boukhebouze M, Barnawi A (2016) Network-based Social Coordination of Business Processes. <i>Information Systems</i> 58:56–74                                                                                                                                                                    |
| 63 | Maaradji A, Dumas M, La Rosa M, Ostovar A (2015) Fast and Accurate Business Process Drift Detection. In: Motahari-Nezhad HR, Recker J, Weidlich M (eds) <i>Proceedings of the 13th International Conference on Business Process Management</i> , pp 406–422                                                               |
| 64 | Maggi FM, Slaats T, Reijers HA (2014) The Automated Discovery of Hybrid Processes. In: Sadiq S, Soffer P, Völzer H (eds) <i>Proceedings of the 12th International Conference on Business Process Management</i> , pp 392–399                                                                                              |
| 65 | Manderscheid J, Reißner D, Röglinger M (2015) Inspection Coming Due! How to Determine the Service Interval of Your Processes! In: Motahari-Nezhad HR, Recker J, Weidlich M (eds) <i>Proceedings of the 13th International Conference on Business Process Management</i> , pp 19–34                                        |

|    |                                                                                                                                                                                                                                                                                                                                          |
|----|------------------------------------------------------------------------------------------------------------------------------------------------------------------------------------------------------------------------------------------------------------------------------------------------------------------------------------------|
| 66 | Mannhard F, de Leoni M, Reijers HA, van der Aalst WMP, Toussaint PJ (2016) From Low-Level Events to Activities - A Pattern-Based Approach. In: La Rosa M, Loos P, Pastor Ó (eds) Proceedings of the 14th International Conference on Business Process Management, pp 125–141                                                             |
| 67 | Marjanovic O (2016) Improvement of Knowledge-Intensive Business Processes through Analytics and Knowledge Sharing. In: Ågerfalk PJ, Levina N, Kien SS (eds) Proceedings of the 37th International Conference on Information Systems, pp 1–19                                                                                             |
| 68 | Mehdiyev N, Evermann J, Fettek P (2018) A Novel Business Process Prediction Model Using a Deep Learning Method. <i>Business &amp; Information Systems Engineering</i> 13:1–15                                                                                                                                                            |
| 69 | Meroni G, Baresi L, Montali M, Plebani P (2018) Multi-Party Business Process Compliance Monitoring through IoT-enabled Artifacts. <i>Information Systems</i> 73:61–78                                                                                                                                                                    |
| 70 | Montani S, Leonardi G (2014) Retrieval and Clustering for Supporting Business Process Adjustment and Analysis. <i>Information Systems</i> 40:128–141                                                                                                                                                                                     |
| 71 | Morana S, Schacht S, Scherp A, Maedche A (2014) Designing a Process Guidance System to Support User's Business Process Guidance. In: Myers MD, Straub DW (eds) Proceedings of the 35th International Conference on Information Systems, pp 1–19                                                                                          |
| 72 | Mrasek R, Mülle J, Böhm K (2015) A New Verification Technique for Large Processes Based on Identification of Relevant Tasks. <i>Information Systems</i> 47:82–97                                                                                                                                                                         |
| 73 | Patiniotakis I, Apostolou D, Verginadis Y, Papageorgiou N, Mentzas G (2017) Assessing Flexibility in Event-driven Process Adaptation. <i>Information Systems</i> 81:201–219                                                                                                                                                              |
| 74 | Pentland B, Haerem T, Khaledi H (2014) Using Action Networks to Detect Change in Repetitive Patterns of Action. In: Myers MD, Straub DW (eds) Proceedings of the 35th International Conference on Information Systems, pp 1–9                                                                                                            |
| 75 | Pereira Librelato T, Pacheco Lacerda D, Rodrigues LH, Veit DR (2014) A Process Improvement Approach Based on the Value Stream Mapping and the Theory of Constraints Thinking Process. <i>Business Process Management Journal</i> 20:922–949                                                                                              |
| 76 | Pittl B, Fill H-G, Honegger G (2017) Enabling Risk-Aware Enterprise Modeling Using Semantic Annotations and Visual Rules. In: Ramos I, Tuunainen V, Krcmar H (eds) Proceedings of the 25th European Conference on Information Systems, pp 326–351                                                                                        |
| 77 | Polpinij J, Ghose A, Dam HK (2015) Mining Business Rules from Business Process Model Repositories. <i>Business Process Management Journal</i> 21:820–836                                                                                                                                                                                 |
| 78 | Ponce-de-León H, Carmona J, vanden Broucke, Seppe K. L. M. (2015) Incorporating Negative Information in Process Discovery. In: Motahari-Nezhad HR, Recker J, Weidlich M (eds) Proceedings of the 13th International Conference on Business Process Management, pp 126–143                                                                |
| 79 | Rangihā ME, Comuzzi M, Karakostas B (2016) A Framework to Capture and Reuse Process Knowledge in Business Process Design and Execution Using Social Tagging. <i>Business Process Management Journal</i> 22:835–859                                                                                                                       |
| 80 | Redlich D, Molka T, Gilani W, Blair G, Rashid A (2014) Constructs Competition Miner: Process Control-Flow Discovery of BP-Domain Constructs. In: Sadiq S, Soffer P, Völzer H (eds) Proceedings of the 12th International Conference on Business Process Management, pp 134–150                                                           |
| 81 | Rehse J-R, Fettek P, Loos P (2016) An Execution-Semantic Approach to Inductive Reference Model Development. In: Proceedings of the 24th European Conference on Information Systems, pp 1–16                                                                                                                                              |
| 82 | Rocha R, Fantinato M, Thom LH, Eler MM (2015) Dynamic Product Line for Business Process Management. <i>Business Process Management Journal</i> 21:1224–1256                                                                                                                                                                              |
| 83 | Rogge-Solti A, Weske M (2015) Prediction of Business Process Durations Using Non-Markovian Stochastic Petri Nets. <i>Information Systems</i> 54:1–14                                                                                                                                                                                     |
| 84 | Ruiz M, Costal D, España S, Franch X, Pastor Ó (2015) GoBIS: An Integrated Framework to Analyse the Goal and Business Process Perspectives in Information Systems. <i>Information Systems</i> 53:330–345                                                                                                                                 |
| 85 | Saldívar J, Vairetti C, Rodríguez C, Daniel F, Casati F, Alarcón R (2016) Analysis and Improvement of Business Process Models Using Spreadsheets. <i>Information Systems</i> 57:1–19                                                                                                                                                     |
| 86 | Satyāl S, Weber I, Paik H-y, di Ciccio C, Mendling J (2018) Business Process Improvement with the AB-BPM Methodology. <i>Information Systems</i>                                                                                                                                                                                         |
| 87 | Seeliger A, Nolle T, Schmidt B, Mühlhäuser M (2016) Process Compliance Checking Using Taint Flow Analysis. In: Ågerfalk PJ, Levina N, Kien SS (eds) Proceedings of the 37th International Conference on Information Systems, pp 1–18                                                                                                     |
| 88 | Senderovich A, Weidlich M, Gal A, Mandelbaum A (2014) Mining Resource Scheduling Protocols. In: Sadiq S, Soffer P, Völzer H (eds) Proceedings of the 12th International Conference on Business Process Management, pp 200–216                                                                                                            |
| 89 | Senderovich A, di Francescomarino C, Ghidini C, Jorbina K, Maggi FM (2017) Intra and Inter-case Features in Predictive Process Monitoring: A Tale of Two Dimensions. In: Carmona J., Engels G., Kumar A., Carmona J, Engels G, Kumar A (eds) Proceedings of the 15th International Conference on Business Process Management, pp 306–323 |
| 90 | Senderovich A, Shleyfman A, Weidlich M, Gal A, Mandelbaum A (2018) To Aggregate or to Eliminate? Optimal Model Simplification for Improved Process Performance Prediction. <i>Information Systems</i> 78:96–111                                                                                                                          |
| 91 | Simões D, Antunes P, Carriço L (2018) Eliciting and Modeling Business Process Stories. <i>Business &amp; Information Systems Engineering</i> 60:115–132                                                                                                                                                                                  |
| 92 | Stark J, Esswein W (2017) Using Secondary Notation to Improve the Cognitive Effectiveness of BPMN Models. In: Ramos I, Tuunainen V, Krcmar H (eds) Proceedings of the 25th European Conference on Information Systems, pp 537–551                                                                                                        |
| 93 | Tax N, Dalmas B, Sidorova N, van der Aalst WMP, Norre S (2018) Interest-Driven Discovery of Local Process Models. <i>Information Systems</i> 77:105–117                                                                                                                                                                                  |
| 94 | Teinemaa I, Dumas M, Maggi FM, di Francescomarino C (2016) Predictive Business Process Monitoring with Structured and Unstructured Data. In: La Rosa M, Loos P, Pastor Ó (eds) Proceedings of the 14th International Conference on Business Process Management, pp 401–417                                                               |
| 95 | Trkman P, Mertens W, Viaene S, Gemmel P (2015) From Business Process Management to Customer Process Management. <i>Business Process Management Journal</i> 21:250–266                                                                                                                                                                    |
| 96 | van Beest NRTP, Dumas M, García-Bañuelos L, La Rosa M (2015) Log Delta Analysis: Interpretable Differencing of Business Process Event Logs. In: Motahari-Nezhad HR, Recker J, Weidlich M (eds) Proceedings of the 13th International Conference on Business Process Management, pp 386–405                                               |
| 97 | van der Aa H, Leopold H, Reijers HA (2017) Comparing Textual Descriptions to Process Models – The Automatic Detection of Inconsistencies. <i>Information Systems</i> 64:447–460                                                                                                                                                          |

---

|     |                                                                                                                                                                                                                |
|-----|----------------------------------------------------------------------------------------------------------------------------------------------------------------------------------------------------------------|
| 98  | van der Aa H, Leopold H, Reijers HA (2018) Checking Process Compliance against Natural Language Specifications Using Behavioral Spaces. <i>Information Systems</i> 78:83–95                                    |
| 99  | Wang N, Sun S, OuYang D (2018) Business Process Modeling Abstraction based on Semi-Supervised Clustering Analysis. <i>Business &amp; Information Systems Engineering</i> 60:525–542                            |
| 100 | Yongchareon S, liu C, Yu J, Zhao X (2015) A View Framework for Modeling and Change Validation of Artifact-Centric Inter-Organizational Business Processes. <i>Information Systems</i> 47:51–81                 |
| 101 | Zahoransky R, Holderer J, Lange A, Brenig C (2016) Process Analysis as First Step Towards Automated Business Security. In: <i>Proceedings of the 24th European Conference on Information Systems</i> , pp 1–15 |
| 102 | Zhu X, Recker J, Zhu G, Santoro FM (2014) Exploring Location-Dependency in Process Modeling. <i>Business Process Management Journal</i> 20:794–815                                                             |

---

**Table A-3: List of all identified BPM methods**

| <b>ID</b> | <b>Key idea (the BPM method helps organizations to...)</b>                                                                                  |
|-----------|---------------------------------------------------------------------------------------------------------------------------------------------|
| 1         | Extract process instances and derive appropriate metrics to improve business performance.                                                   |
| 2         | Verify information flow control for business process models.                                                                                |
| 3         | Identify contextual factors which impact processes and their process goals to adapt these.                                                  |
| 4         | Assess the social sustainability of processes to diagnose participants resist following modeled process.                                    |
| 5         | Encapsulate event stream processing as business functions.                                                                                  |
| 6         | Support for implementing language extensions in modeling tools.                                                                             |
| 7         | Generate compliance processes models that visualize the work history as GANTT charts.                                                       |
| 8         | Mine processes in software development projects to identify dependencies between artifacts.                                                 |
| 9         | Automatically detect potential process weaknesses in semantic process models.                                                               |
| 10        | Use modeling and simulation standards to measure process key performance indicators and test improvements.                                  |
| 11        | Derive concrete recommendations for process improvement in a goal-oriented manner.                                                          |
| 12        | Model process behavior and detect differences of variants of the same process.                                                              |
| 13        | Detect and respond to unforeseen process events.                                                                                            |
| 14        | Facilitate the modeling, simulation, analysis and semantic validation of complex event-based systems.                                       |
| 15        | Predict the behavior of future processes based on past behavior.                                                                            |
| 16        | Control the safe execution of tasks and signals possible misbehaviors at runtime.                                                           |
| 17        | Automatically analyze gaps concerning human resource management in business processes.                                                      |
| 18        | Predict performance requirement violation of process instances.                                                                             |
| 19        | Assess the maturity of BPM governance practices to identify activities for improvement.                                                     |
| 20        | Facilitate incremental refinement, adaptation of processes, and dynamic creation of sub-processes.                                          |
| 21        | Provide sophisticated diagnostics by aligning event logs and predefined declarative process models.                                         |
| 22        | Facilitate organizational change through BPM.                                                                                               |
| 23        | Graphically represent process performance indicators together with process models.                                                          |
| 24        | Exploit digitalization potential of business processes.                                                                                     |
| 25        | Design business capability-aware configurable process models.                                                                               |
| 26        | Include a-priori knowledge of processes to predict the sequence of future activities of ongoing processes.                                  |
| 27        | Generate linguistic summaries of event logs that are concise enough to be used in practical settings.                                       |
| 28        | Provide transparency concerning process ownership.                                                                                          |
| 29        | Define dead-path-elimination for cyclic workflows.                                                                                          |
| 30        | Propagate private process changes and preserves consistency and compatibility of the process choreography.                                  |
| 31        | Systematically and automatically analyze and match conceptual legacy process models in different languages.                                 |
| 32        | Create value and improve efficiency based on analyzing strategic operations.                                                                |
| 33        | Facilitate model integration and make conceptual models interoperable.                                                                      |
| 34        | Write and validate business data constraints in run-time from a business expert perspective.                                                |
| 35        | Identify promising investments in visibility-creating technologies in a process environment.                                                |
| 36        | Select suitable processes according to organizational objectives for a Business Process Reengineering project.                              |
| 37        | Role play actual process stakeholders and specifications in a virtual world.                                                                |
| 38        | Automatically plan context-aware process models which consider static and non-static context information.                                   |
| 39        | Automatically construct a control flow structure.                                                                                           |
| 40        | Design process models for networked value constellations.                                                                                   |
| 41        | Optimize low-value processes to facilitate a holistic management of the organization's entire business processes.                           |
| 42        | Design event processing networks prior deciding for a complex event processing product.                                                     |
| 43        | Coordinate business process improvement techniques in a business process improvement project.                                               |
| 44        | Generate artificial event data and receive full control over the generated data characteristics.                                            |
| 45        | Reduce complexity of an initial BPMN model.                                                                                                 |
| 46        | Achieve a process-oriented structure without destroying existing department structures.                                                     |
| 47        | Detect process compliance violations.                                                                                                       |
| 48        | Monitor business process compliance and highlight corresponding causes.                                                                     |
| 49        | Use stakeholder-specific viewpoints on collaborative process modeling.                                                                      |
| 50        | Retrieve process clones and enhance process standardization.                                                                                |
| 51        | Guarantee temporal consistency of changed process instances.                                                                                |
| 52        | Build ambidexterity into inter-organizational IT-enabled service processes to meet the needs of their customers.                            |
| 53        | Evaluate and select proper BPM roadmaps for business process improvements.                                                                  |
| 54        | Prioritize processes for improvement based on the process' individual need for improvement and the interconnectedness with other processes. |
| 55        | Automatically name business process models and fragments.                                                                                   |
| 56        | Discover sound process models from event logs.                                                                                              |
| 57        | Understand its role in the value creation process.                                                                                          |
| 58        | Decide which process improvement roadmap is in line with the principles of project portfolio selection and value-based management.          |
| 59        | Determine an optimal process flexibility roadmap.                                                                                           |



|     |                                                                                                                                 |
|-----|---------------------------------------------------------------------------------------------------------------------------------|
| 60  | Visualize social collaboration processes.                                                                                       |
| 61  | Compare and visualize the differences between two process logs.                                                                 |
| 62  | Coordinate conflicts over resources during process execution.                                                                   |
| 63  | Automatically detect process drift.                                                                                             |
| 64  | Generate hybrid process model as a mix of declarative and procedural model elements—from event logs.                            |
| 65  | Predict after which number of executed instances a process should undergo an in-depth analysis.                                 |
| 66  | Capture domain knowledge on the relation between activities and events.                                                         |
| 67  | Improve business intelligence and analytic supporting knowledge-intensive business processes on an ongoing base.                |
| 68  | Predict an upcoming process event from previous completed activities.                                                           |
| 69  | Monitor the compliance of the execution of multi-party business processes.                                                      |
| 70  | Support run-time adjustment and a posteriori analysis of business processes.                                                    |
| 71  | Guide users through process compliance.                                                                                         |
| 72  | Support the verification of process compliance by identifying relevant tasks for verification.                                  |
| 73  | Foster the ability to deal with both foreseen and unforeseen changes in business processes.                                     |
| 74  | Identify the date on which a process change occurred as well as the relative magnitude of the change.                           |
| 75  | Provide an overview of process losses and corresponding prioritization steps for its elimination.                               |
| 76  | Support the identification and documentation of risks in an organization and the definition of measures for their mitigation.   |
| 77  | Extract business rules from existing process models.                                                                            |
| 78  | Derive process models which are not only simple, fitting and precise, but also good on generalizing the right behavior.         |
| 79  | Capture process knowledge to improve user collaboration and manage ad hoc and semi-structured processes.                        |
| 80  | Mine process models which consist of common business process domain constructs and represents the main behavior of the process. |
| 81  | Derive inductive reference models including the behavior of input models rather than their design.                              |
| 82  | Systematize operational processes for managing and improving processes.                                                         |
| 83  | Detect undesired deviations to react accordingly.                                                                               |
| 84  | Facilitate the traceability between goal and business process models.                                                           |
| 85  | Provide necessary instruments to analyze processes.                                                                             |
| 86  | Facilitate process improvement validation.                                                                                      |
| 87  | Check whether the actual 'as-is' process graph violates against compliance constraints.                                         |
| 88  | Automatically learn about resource decisions from process events.                                                               |
| 89  | Enhance predictive process monitoring accounting for intra-case and inter-case dependencies.                                    |
| 90  | Enhance discovery algorithms by including design choices in terms of performance measures.                                      |
| 91  | Elicit process stories by means of textual and visual elements.                                                                 |
| 92  | Improve the cognitive effectiveness of BPMN-models.                                                                             |
| 93  | Discover goal-driven local-process models based on utility functions and constraints.                                           |
| 94  | Handle structured and unstructured event payloads for process monitoring.                                                       |
| 95  | Understand the customer needs and integrate the organizations' products and services into customer processes.                   |
| 96  | Identify and explain behavioral differences between two business process event logs.                                            |
| 97  | Discover inconsistencies between a process model and its textual description.                                                   |
| 98  | Check for possible interpretations of process descriptions.                                                                     |
| 99  | Enhance cluster analysis for process model abstraction.                                                                         |
| 100 | Model and validate changes of inter-organizational business processes.                                                          |
| 101 | Automatically check whether a process contradicts with compliance or not.                                                       |
| 102 | Extend context-aware process modeling towards location-awareness to increase organizational objectives.                         |

## Appendix 2 - Calculation of Cohen's Kappa, DCS, and DA

To better understand how the indicators *Cohen's Kappa*, *degree of context specificity* (DCS, Section 4.3 and 5.1), and *degree of applicability* (DA, Section 4.4 and 5.2) are calculated, we provide equations, required input values, and exemplary calculations below.

### (1) Cohen's Kappa (Cohen 1960)

Cohen's Kappa measures the agreement between two raters where each rater classifies  $N$  items into mutually exclusive categories.  $\kappa$  is defined as:

$$\kappa = \frac{p_o - p_e}{1 - p_e} = 1 - \frac{1 - p_o}{1 - p_e}$$

with  $p_o$  = proportion of units in which the raters agreed

$p_e$  = proportion of units for which agreement is expected by chance

Expressed in frequencies to facilitate computation:

$$\kappa = \frac{f_o - f_e}{N - f_e}$$

with  $f_o$  = amount of units in which the raters agreed

$f_e$  = amount of units for which agreement is expected by chance

$N$  = amount of units to be assessed

We calculated Cohen's Kappa for each BPM method as shown in the following example. When classifying the BPM method proposed by Antunes et al. (2014), two co-authors assessed that method as shown in Figure A-1.

Accordingly, the Cohen's Kappa is calculated as follows:

$$\kappa = \frac{(26-20)}{(29-20)} = 0.67 \quad \text{with } f_o = 26, f_e = 20, \text{ and } N = 29$$

| Antunes et al. 2014    |                     |                                  | Author 1          | Author 2 | Agreement     |
|------------------------|---------------------|----------------------------------|-------------------|----------|---------------|
| Process dimension      | Value contribution  | Core process                     | -                 | -        | TRUE          |
|                        |                     | Management process               | -                 | -        | TRUE          |
|                        |                     | Support process                  | -                 | -        | TRUE          |
|                        | Repetitiveness      | Repetitive                       | a                 | -        | FALSE         |
|                        |                     | Non-repetitive                   | -                 | -        | TRUE          |
|                        | Knowledge intensity | Low knowledge-intensity          | -                 | -        | TRUE          |
|                        |                     | High knowledge-intensity         | -                 | -        | TRUE          |
|                        | Creativity          | Low creativity                   | -                 | -        | TRUE          |
|                        |                     | High creativity                  | -                 | -        | TRUE          |
|                        | Interdependence     | Low interdependence              | -                 | -        | TRUE          |
|                        |                     | High interdependence             | a                 | a        | TRUE          |
|                        | Variability         | Low variability                  | -                 | -        | TRUE          |
| High Variability       |                     | -                                | a                 | FALSE    |               |
| Organization dimension | Scope               | Intra-organizational processes   | a                 | a        | TRUE          |
|                        |                     | Inter-organizational processes   | -                 | -        | TRUE          |
|                        | Industry            | Product industry                 | -                 | -        | TRUE          |
|                        |                     | Service Industry                 | -                 | -        | TRUE          |
|                        |                     | Product & Service Industry       | -                 | -        | TRUE          |
|                        | Size                | Start-up                         | -                 | -        | TRUE          |
|                        |                     | Small and medium enterprise      | -                 | -        | TRUE          |
|                        |                     | Large Organization               | -                 | -        | TRUE          |
|                        | Culture             | Culture highly supportive of BPM | a                 | a        | TRUE          |
|                        |                     | Culture non-supportive of BPM    | na                | -        | FALSE         |
|                        | Resources           | Low organizational resources     | -                 | -        | TRUE          |
|                        |                     | High organizational resources    | a                 | a        | TRUE          |
| Environment dimension  | Competitiveness     | Low competitive environment      | -                 | -        | TRUE          |
|                        |                     | High competitive environment     | -                 | -        | TRUE          |
|                        | Uncertainty         | Low environmental uncertainty    | -                 | -        | TRUE          |
|                        |                     | High environmental uncertainty   | -                 | -        | TRUE          |
|                        |                     |                                  | <b>Cohen Kap.</b> | 0.67     | (Reliability) |
|                        |                     | <b>Author 1</b>                  | <b>Author 2</b>   |          | <b>Sum</b>    |
|                        |                     |                                  | 1                 | 3        | 5             |
| 1                      |                     | 0                                | 1                 | 0        | 1             |
| 3                      |                     | 0                                | 22                | 1        | 23            |
| 5                      |                     | 0                                | 1                 | 4        | 5             |
| <b>Sum</b>             |                     | <b>0</b>                         | <b>24</b>         | <b>5</b> | <b>29</b>     |
| <b>Agreement</b>       |                     | 0                                | 22                | 4        | 26            |
| <b>By Chance</b>       |                     | 0.00000                          | 19.034            | 0.862    | 20            |

Figure A-1: Calculation results Cohen's Kappa (BPM method by Antunes et al. 2014)

## (2) Degree of context specificity (DCS) (BPM method by Antunes et al. 2014)

To assess the context specificity of a given BPM method and to classify whether this method follows a special or a general purpose, we defined the degree of context specificity (DCS). As for Cohen's Kappa, an exemplary calculation of the DCS according to Eq. (1) (Section 4.3) for the BPM method by Antunes et al. (2014) is shown in Figure A-2.

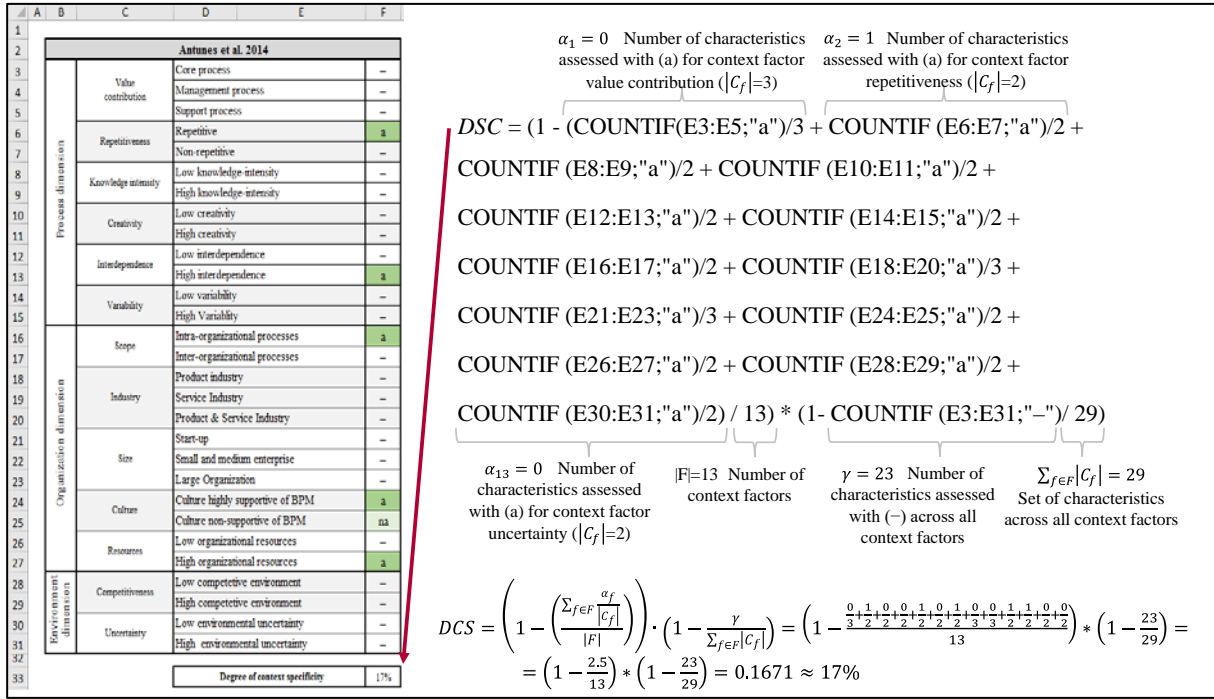

Figure A-2: Calculation results for DCS (BPM method by Antunes et al. 2014)

## (3) Degree of applicability (DA) (BPM method by Antunes et al. 2014 for process P6)

To assess the extent to which a given BPM method is applicable to a given context (i.e., how often the criteria (a) or (na) match the specified context), we defined the degree of applicability (DA). In case a BPM method has not been assessed by the original method engineer, we offer two calculation modes. In the risk-averse mode, all (-) are treated as (na), i.e., context characteristics which could not be assessed based on publicly available data are treated as if the method were not applicable. By contrast, all (-) are treated as (a) in the risk-taking mode. Subsequently, all (a) values are replaced by 1 and all (na) values by 0. Again, we provide an exemplary calculation for the DA according to Eq. (2) (Section 4.4) following the risk-averse calculation modus in Figure A-3, which assess whether the BPM method by Antunes et al. (2014) is applicable for the context of process P6 (Section 5.2).

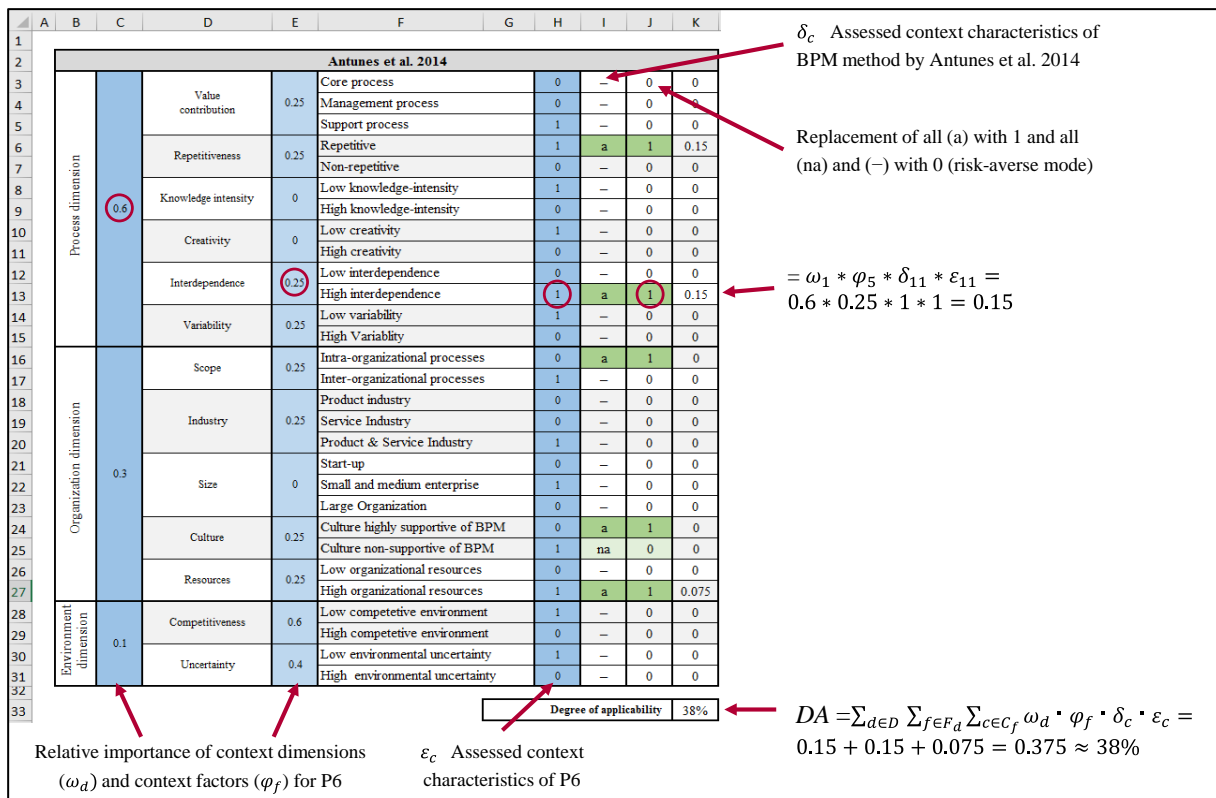

**Figure A-3:** Calculation results for DA following the risk-averse mode (BPM method by Antunes et al. 2014 for process P6)

## Appendix 3 – Results applying the Assessment Process to a sample of 103 BPM methods

| ID  | Author                     | Lifecycle dimension<br>(see Activity A2) | Goal dimension<br>(see Activity A3) | Context dimension<br>(see Activity A4) |                    |                 |                |                     |                         |                          |                  |                 |                     |                      |                        |                  |                                |                                |                  |                  |                            |          |                             |                    |                                  |                               |                              |                               |                             |                              | Indicator<br>Degree of context specificity (DCS) | Reliability<br>Cohen's Kappa |                               |                                |     |     |
|-----|----------------------------|------------------------------------------|-------------------------------------|----------------------------------------|--------------------|-----------------|----------------|---------------------|-------------------------|--------------------------|------------------|-----------------|---------------------|----------------------|------------------------|------------------|--------------------------------|--------------------------------|------------------|------------------|----------------------------|----------|-----------------------------|--------------------|----------------------------------|-------------------------------|------------------------------|-------------------------------|-----------------------------|------------------------------|--------------------------------------------------|------------------------------|-------------------------------|--------------------------------|-----|-----|
|     |                            |                                          |                                     | Process dimension                      |                    |                 |                |                     |                         |                          |                  |                 |                     |                      | Organization dimension |                  |                                |                                |                  |                  |                            |          |                             |                    | Environment dimension            |                               |                              |                               |                             |                              |                                                  |                              |                               |                                |     |     |
|     |                            |                                          |                                     | Value contribution                     |                    |                 | Repetitiveness | Knowledge intensity |                         | Creativity               | Inter-dependence | Variability     | Scope               | Industry             |                        | Size             |                                | Culture                        | Resources        | Competitiveness  | Uncertainty                |          |                             |                    |                                  |                               |                              |                               |                             |                              |                                                  |                              |                               |                                |     |     |
|     |                            |                                          |                                     | Core process                           | Management process | Support process | Repetitive     | Non-repetitive      | Low knowledge-intensity | High knowledge-intensity | Low creativity   | High creativity | Low interdependence | High interdependence | Low variability        | High variability | Intra-organizational processes | Inter-organizational processes | Product industry | Service industry | Product & service industry | Start-up | Small and medium enterprise | Large organization | Culture highly supportive of BPM | Culture non-supportive of BPM | Low organizational resources | High organizational resources | Low competitive environment | High competitive environment |                                                  |                              | Low environmental uncertainty | High environmental uncertainty |     |     |
|     |                            |                                          |                                     |                                        |                    |                 |                |                     |                         |                          |                  |                 |                     |                      |                        |                  |                                |                                |                  |                  |                            |          |                             |                    |                                  |                               |                              |                               |                             |                              |                                                  |                              |                               |                                |     |     |
|     |                            |                                          |                                     |                                        |                    |                 |                |                     |                         |                          |                  |                 |                     |                      |                        |                  |                                |                                |                  |                  |                            |          |                             |                    |                                  |                               |                              |                               |                             |                              |                                                  |                              |                               |                                |     |     |
| 3   | Anastassiou et al. 2016    | Design                                   | Exploitation                        | a                                      | -                  | -               | -              | -                   | -                       | -                        | -                | -               | -                   | -                    | -                      | -                | -                              | -                              | -                | -                | -                          | -        | -                           | -                  | -                                | -                             | -                            | -                             | -                           | -                            | -                                                | -                            | -                             | -                              | 21% | 67% |
| 5   | Appel et al. 2014          | Design                                   | Exploitation                        | -                                      | -                  | -               | a              | -                   | -                       | -                        | -                | -               | -                   | -                    | -                      | -                | -                              | -                              | -                | -                | -                          | -        | -                           | -                  | -                                | -                             | -                            | -                             | -                           | -                            | -                                                | -                            | -                             | 10%                            | 79% |     |
| 6   | Atkinson et al. 2015       | Design                                   | Exploitation                        | -                                      | -                  | -               | -              | -                   | -                       | -                        | -                | -               | -                   | -                    | -                      | -                | -                              | -                              | -                | -                | -                          | -        | -                           | -                  | -                                | -                             | -                            | -                             | -                           | -                            | -                                                | -                            | -                             | 7%                             | 65% |     |
| 14  | Boubeta-Puig et al. 2017   | Design                                   | Exploitation                        | -                                      | -                  | -               | -              | -                   | a                       | -                        | -                | a               | -                   | -                    | -                      | -                | -                              | -                              | -                | -                | -                          | -        | -                           | -                  | -                                | -                             | -                            | -                             | -                           | -                            | -                                                | -                            | 9%                            | 72%                            |     |     |
| 17  | Cabamillas et al. 2015     | Design                                   | Exploitation                        | -                                      | -                  | -               | -              | -                   | -                       | a                        | -                | -               | -                   | -                    | -                      | -                | -                              | -                              | -                | -                | -                          | -        | -                           | -                  | -                                | -                             | -                            | -                             | -                           | -                            | -                                                | -                            | 6%                            | 65%                            |     |     |
| 20  | de Leoni et al. 2015       | Design                                   | Exploitation                        | a                                      | -                  | -               | -              | -                   | -                       | -                        | -                | -               | -                   | -                    | -                      | -                | -                              | -                              | -                | -                | -                          | -        | -                           | -                  | -                                | -                             | -                            | -                             | -                           | -                            | -                                                | -                            | 3%                            | 100%                           |     |     |
| 22  | Debois et al. 2014         | Design                                   | Exploitation                        | -                                      | -                  | -               | a              | -                   | -                       | a                        | -                | -               | -                   | -                    | -                      | -                | -                              | -                              | -                | -                | -                          | -        | -                           | -                  | -                                | -                             | -                            | -                             | -                           | -                            | -                                                | -                            | 17%                           | 79%                            |     |     |
| 23  | del-Río-Ortega et al. 2017 | Design                                   | Exploitation                        | -                                      | -                  | -               | a              | -                   | -                       | -                        | -                | -               | -                   | -                    | -                      | -                | -                              | -                              | -                | -                | -                          | -        | -                           | -                  | -                                | -                             | -                            | -                             | -                           | -                            | -                                                | -                            | 18%                           | 63%                            |     |     |
| 25  | Derguech et al. 2017       | Design                                   | Exploitation                        | -                                      | -                  | -               | -              | -                   | -                       | -                        | -                | -               | -                   | -                    | -                      | -                | -                              | -                              | -                | -                | -                          | -        | -                           | -                  | -                                | -                             | -                            | -                             | -                           | -                            | -                                                | -                            | 6%                            | 65%                            |     |     |
| 28  | do Prado Leite et al. 2016 | Design                                   | Exploitation                        | -                                      | -                  | -               | a              | -                   | -                       | -                        | -                | -               | -                   | -                    | -                      | -                | -                              | -                              | -                | -                | -                          | -        | -                           | -                  | -                                | -                             | -                            | -                             | -                           | -                            | -                                                | -                            | 14%                           | 71%                            |     |     |
| 29  | Fahland and Völzer 2018    | Design                                   | Exploitation                        | -                                      | -                  | -               | -              | -                   | -                       | -                        | -                | -               | -                   | -                    | -                      | -                | -                              | -                              | -                | -                | -                          | -        | -                           | -                  | -                                | -                             | -                            | -                             | -                           | -                            | -                                                | -                            | 9%                            | 71%                            |     |     |
| 31  | Fengel 2014                | Design                                   | Exploitation                        | -                                      | -                  | -               | -              | -                   | -                       | -                        | -                | -               | -                   | -                    | -                      | -                | -                              | -                              | -                | -                | -                          | -        | -                           | -                  | -                                | -                             | -                            | -                             | -                           | -                            | -                                                | -                            | 19%                           | 91%                            |     |     |
| 33  | Gailly et al. 2017         | Design                                   | Exploitation                        | -                                      | -                  | -               | -              | -                   | -                       | -                        | -                | -               | -                   | -                    | -                      | -                | -                              | -                              | -                | -                | -                          | -        | -                           | -                  | -                                | -                             | -                            | -                             | -                           | -                            | -                                                | -                            | 7%                            | 79%                            |     |     |
| 37  | Harman et al. 2016         | Design                                   | Exploitation                        | -                                      | -                  | -               | -              | -                   | -                       | -                        | -                | -               | -                   | -                    | -                      | -                | -                              | -                              | -                | -                | -                          | -        | -                           | -                  | -                                | -                             | -                            | -                             | -                           | -                            | -                                                | -                            | 3%                            | 65%                            |     |     |
| 38  | Heinrich and Schön 2015    | Design                                   | Exploitation                        | -                                      | -                  | -               | -              | -                   | -                       | -                        | -                | -               | -                   | -                    | -                      | -                | -                              | -                              | -                | -                | -                          | -        | -                           | -                  | -                                | -                             | -                            | -                             | -                           | -                            | -                                                | -                            | 19%                           | 74%                            |     |     |
| 39  | Heinrich and Schön 2016    | Design                                   | Exploitation                        | -                                      | -                  | -               | -              | -                   | -                       | -                        | -                | -               | -                   | -                    | -                      | -                | -                              | -                              | -                | -                | -                          | -        | -                           | -                  | -                                | -                             | -                            | -                             | -                           | -                            | -                                                | -                            | 15%                           | 72%                            |     |     |
| 40  | Hotie and Gordijn 2017     | Design                                   | Exploitation                        | a                                      | -                  | -               | -              | -                   | -                       | -                        | -                | -               | -                   | -                    | -                      | -                | -                              | -                              | -                | -                | -                          | -        | -                           | -                  | -                                | -                             | -                            | -                             | -                           | -                            | -                                                | -                            | 15%                           | 80%                            |     |     |
| 42  | Janiesch and Diebold 2016  | Design                                   | Exploitation                        | -                                      | -                  | -               | -              | -                   | -                       | -                        | -                | -               | -                   | -                    | -                      | -                | -                              | -                              | -                | -                | -                          | -        | -                           | -                  | -                                | -                             | -                            | -                             | -                           | -                            | -                                                | -                            | 16%                           | 61%                            |     |     |
| 44  | Jouck and Depaire 2018     | Design                                   | Exploitation                        | -                                      | -                  | -               | -              | -                   | -                       | -                        | -                | -               | -                   | -                    | -                      | -                | -                              | -                              | -                | -                | -                          | -        | -                           | -                  | -                                | -                             | -                            | -                             | -                           | -                            | -                                                | -                            | 3%                            | 65%                            |     |     |
| 49  | Krumreich et al. 2014      | Design                                   | Exploitation                        | a                                      | a                  | -               | -              | -                   | -                       | -                        | -                | -               | -                   | -                    | -                      | -                | -                              | -                              | -                | -                | -                          | -        | -                           | -                  | -                                | -                             | -                            | -                             | -                           | -                            | -                                                | -                            | 17%                           | 89%                            |     |     |
| 50  | La Rosa et al. 2015        | Design                                   | Exploitation                        | -                                      | -                  | -               | -              | -                   | -                       | -                        | -                | -               | -                   | -                    | -                      | -                | -                              | -                              | -                | -                | -                          | -        | -                           | -                  | -                                | -                             | -                            | -                             | -                           | -                            | -                                                | -                            | 10%                           | 84%                            |     |     |
| 55  | Leopoldi et al. 2014       | Design                                   | Exploitation                        | -                                      | -                  | -               | -              | -                   | -                       | -                        | -                | -               | -                   | -                    | -                      | -                | -                              | -                              | -                | -                | -                          | -        | -                           | -                  | -                                | -                             | -                            | -                             | -                           | -                            | -                                                | -                            | 10%                           | 64%                            |     |     |
| 56  | Liesaputra et al. 2015     | Design                                   | Exploitation                        | -                                      | -                  | -               | -              | -                   | -                       | -                        | -                | -               | -                   | -                    | -                      | -                | -                              | -                              | -                | -                | -                          | -        | -                           | -                  | -                                | -                             | -                            | -                             | -                           | -                            | -                                                | -                            | 9%                            | 63%                            |     |     |
| 60  | Liptchinsky et al. 2014    | Design                                   | Exploitation                        | -                                      | -                  | -               | -              | -                   | -                       | -                        | -                | -               | -                   | -                    | -                      | -                | -                              | -                              | -                | -                | -                          | -        | -                           | -                  | -                                | -                             | -                            | -                             | -                           | -                            | -                                                | -                            | 3%                            | 65%                            |     |     |
| 64  | Maggi et al. 2014          | Design                                   | Exploitation                        | -                                      | -                  | -               | -              | -                   | -                       | -                        | -                | -               | -                   | -                    | -                      | -                | -                              | -                              | -                | -                | -                          | -        | -                           | -                  | -                                | -                             | -                            | -                             | -                           | -                            | -                                                | -                            | 3%                            | 100%                           |     |     |
| 72  | Mrasek et al. 2015         | Design                                   | Exploitation                        | a                                      | -                  | -               | -              | -                   | -                       | -                        | -                | -               | -                   | -                    | -                      | -                | -                              | -                              | -                | -                | -                          | -        | -                           | -                  | -                                | -                             | -                            | -                             | -                           | -                            | -                                                | -                            | 3%                            | 65%                            |     |     |
| 76  | Pátl et al. 2017           | Design                                   | Exploitation                        | -                                      | -                  | -               | -              | -                   | -                       | -                        | -                | -               | -                   | -                    | -                      | -                | -                              | -                              | -                | -                | -                          | -        | -                           | -                  | -                                | -                             | -                            | -                             | -                           | -                            | -                                                | -                            | 6%                            | 65%                            |     |     |
| 78  | Ponce-de-León et al. 2015  | Design                                   | Exploitation                        | -                                      | -                  | -               | -              | -                   | -                       | -                        | -                | -               | -                   | -                    | -                      | -                | -                              | -                              | -                | -                | -                          | -        | -                           | -                  | -                                | -                             | -                            | -                             | -                           | -                            | -                                                | -                            | 3%                            | 65%                            |     |     |
| 80  | Redlich et al. 2014        | Design                                   | Exploitation                        | a                                      | -                  | -               | -              | -                   | -                       | -                        | -                | -               | -                   | -                    | -                      | -                | -                              | -                              | -                | -                | -                          | -        | -                           | -                  | -                                | -                             | -                            | -                             | -                           | -                            | -                                                | -                            | 12%                           | 64%                            |     |     |
| 81  | Rehse et al. 2016          | Design                                   | Exploitation                        | -                                      | -                  | -               | -              | -                   | -                       | -                        | -                | -               | -                   | -                    | -                      | -                | -                              | -                              | -                | -                | -                          | -        | -                           | -                  | -                                | -                             | -                            | -                             | -                           | -                            | -                                                | -                            | 30%                           | 83%                            |     |     |
| 84  | Ruiz et al. 2015           | Design                                   | Exploitation                        | -                                      | -                  | -               | -              | -                   | -                       | -                        | -                | -               | -                   | -                    | -                      | -                | -                              | -                              | -                | -                | -                          | -        | -                           | -                  | -                                | -                             | -                            | -                             | -                           | -                            | -                                                | -                            | 9%                            | 100%                           |     |     |
| 91  | Simões et al. 2018         | Design                                   | Exploitation                        | -                                      | -                  | -               | -              | -                   | -                       | -                        | -                | -               | -                   | -                    | -                      | -                | -                              | -                              | -                | -                | -                          | -        | -                           | -                  | -                                | -                             | -                            | -                             | -                           | -                            | -                                                | -                            | 10%                           | 79%                            |     |     |
| 92  | Stark and Esswein 2017     | Design                                   | Exploitation                        | -                                      | -                  | -               | -              | -                   | -                       | -                        | -                | -               | -                   | -                    | -                      | -                | -                              | -                              | -                | -                | -                          | -        | -                           | -                  | -                                | -                             | -                            | -                             | -                           | -                            | -                                                | -                            | 6%                            | 65%                            |     |     |
| 97  | van der Aa et al. 2017     | Design                                   | Exploitation                        | -                                      | -                  | -               | -              | -                   | -                       | -                        | -                | -               | -                   | -                    | -                      | -                | -                              | -                              | -                | -                | -                          | -        | -                           | -                  | -                                | -                             | -                            | -                             | -                           | -                            | -                                                | -                            | 12%                           | 61%                            |     |     |
| 99  | Wang et al. 2018           | Design                                   | Exploitation                        | -                                      | -                  | -               | -              | -                   | -                       | -                        | -                | -               | -                   | -                    | -                      | -                | -                              | -                              | -                | -                | -                          | -        | -                           | -                  | -                                | -                             | -                            | -                             | -                           | -                            | -                                                | -                            | 3%                            | 100%                           |     |     |
| 100 | Yongchareon et al. 2015    | Design                                   | Exploitation                        | a                                      | -                  | -               | -              | -                   | -                       | -                        | -                | -               | -                   | -                    | -                      | -                | -                              | -                              | -                | -                | -                          | -        | -                           | -                  | -                                | -                             | -                            | -                             | -                           | -                            | -                                                | -                            | 18%                           | 77%                            |     |     |
| 102 | Zhu et al. 2014            | Design                                   | Exploitation                        | -                                      | -                  | -               | a              | -                   | -                       | -                        | -                | -               | -                   | -                    | -                      | -                | -                              | -                              | -                | -                | -                          | -        | -                           | -                  | -                                | -                             | -                            | -                             | -                           | -                            | -                                                | -                            | 12%                           | 77%                            |     |     |

a applicable to a specific context characteristic    na not applicable to a specific context characteristic    - applicability is not assessable

Figure A-4: Exploitative BPM methods related to the design stage of the BPM lifecycle

| ID | Author                  | Lifecycle dimension<br>(see Activity A2) | Goal dimension<br>(see Activity A3) | Process dimension  |                    |                 |                 |                     |                         |                          |                  |                 |                     | Organization dimension |                 |                  |                                |                                |                  |                  |                            | Environment dimension |                             | Indicator | Reliability |                    |                                  |                               |                              |                               |                             |                              |                               |
|----|-------------------------|------------------------------------------|-------------------------------------|--------------------|--------------------|-----------------|-----------------|---------------------|-------------------------|--------------------------|------------------|-----------------|---------------------|------------------------|-----------------|------------------|--------------------------------|--------------------------------|------------------|------------------|----------------------------|-----------------------|-----------------------------|-----------|-------------|--------------------|----------------------------------|-------------------------------|------------------------------|-------------------------------|-----------------------------|------------------------------|-------------------------------|
|    |                         |                                          |                                     | Value contribution |                    |                 | Repetitive-ness | Knowledge intensity |                         | Creativity               | Inter-dependence |                 | Variability         |                        | Scope           | Industry         |                                | Size                           |                  | Culture          | Resources                  | Competitive-ness      | Uncertainty                 |           |             |                    |                                  |                               |                              |                               |                             |                              |                               |
|    |                         |                                          |                                     | Core process       | Management process | Support process | Repetitive      | Non-repetitive      | Low knowledge-intensity | High knowledge-intensity | Low creativity   | High creativity | Low interdependence | High interdependence   | Low variability | High variability | Intra-organizational processes | Inter-organizational processes | Product industry | Service industry | Product & service industry | Start-up              | Small and medium enterprise |           |             | Large organization | Culture highly supportive of BPM | Culture non-supportive of BPM | Low organizational resources | High organizational resources | Low competitive environment | High competitive environment | Low environmental uncertainty |
| 30 | Fdhila et al. 2015      | Implementation                           | Exploitation                        | a                  | -                  | a               | -               | -                   | -                       | -                        | -                | -               | -                   | -                      | na              | a                | -                              | -                              | -                | a                | -                          | -                     | -                           | -         | -           | -                  | -                                | -                             | -                            | -                             | -                           | 15%                          | 77%                           |
| 43 | Johannsen and Fill 2014 | Implementation                           | Exploitation                        | -                  | -                  | -               | -               | -                   | -                       | na                       | a                | na              | a                   | na                     | a               | -                | -                              | -                              | -                | -                | -                          | -                     | -                           | -         | a           | -                  | -                                | -                             | -                            | -                             | -                           | 27%                          | 76%                           |
| 51 | Lanz and Reichert 2014  | Implementation                           | Exploitation                        | a                  | -                  | -               | -               | -                   | -                       | -                        | -                | -               | -                   | -                      | a               | na               | -                              | -                              | -                | -                | -                          | -                     | -                           | -         | -           | -                  | -                                | -                             | na                           | a                             | -                           | 15%                          | 62%                           |
| 57 | Lindman et al. 2016     | Implementation                           | Exploitation                        | a                  | na                 | na              | -               | -                   | -                       | -                        | -                | -               | -                   | -                      | -               | -                | a                              | -                              | -                | -                | -                          | -                     | -                           | -         | -           | -                  | na                               | a                             | na                           | a                             | 24%                         | 76%                          |                               |
| 62 | Maamar et al. 2016      | Implementation                           | Exploitation                        | -                  | -                  | -               | -               | -                   | -                       | -                        | a                | -               | -                   | -                      | -               | -                | -                              | a                              | -                | -                | -                          | -                     | -                           | -         | -           | -                  | -                                | -                             | -                            | -                             | a                           | 12%                          | 76%                           |
| 71 | Morana et al. 2014      | Implementation                           | Exploitation                        | -                  | -                  | -               | -               | -                   | -                       | -                        | -                | -               | -                   | -                      | a               | a                | a                              | -                              | -                | -                | -                          | -                     | -                           | -         | -           | a                  | -                                | -                             | -                            | -                             | -                           | 9%                           | 78%                           |
| 79 | Ranghla et al. 2016     | Implementation                           | Exploitation                        | -                  | -                  | -               | na              | -                   | -                       | a                        | -                | a               | -                   | -                      | na              | a                | a                              | -                              | -                | -                | -                          | -                     | -                           | -         | -           | a                  | -                                | -                             | -                            | -                             | -                           | 23%                          | 74%                           |
| 95 | Trkman et al. 2015      | Implementation                           | Exploitation                        | a                  | na                 | na              | -               | -                   | -                       | -                        | -                | -               | -                   | -                      | -               | na               | a                              | -                              | -                | a                | -                          | -                     | -                           | -         | -           | -                  | -                                | -                             | a                            | -                             | -                           | 23%                          | 85%                           |

a applicable to a specific context characteristic

na not applicable to a specific context characteristic

- applicability is not assessable

Figure A-5: Exploitative BPM methods related to the implementation stage of the BPM lifecycle

|     |                                |                                          |                                     | Context dimension<br>(see Activity A4) |                    |                 |            |                     |                         |                          |                |                  |                     |                        |                 |                  |                                |                                |                  |                  |                            |          |                             |                       |                                  |                               |                              |                               |                             |                                     |               |
|-----|--------------------------------|------------------------------------------|-------------------------------------|----------------------------------------|--------------------|-----------------|------------|---------------------|-------------------------|--------------------------|----------------|------------------|---------------------|------------------------|-----------------|------------------|--------------------------------|--------------------------------|------------------|------------------|----------------------------|----------|-----------------------------|-----------------------|----------------------------------|-------------------------------|------------------------------|-------------------------------|-----------------------------|-------------------------------------|---------------|
|     |                                |                                          |                                     | Process dimension                      |                    |                 |            |                     |                         |                          |                |                  |                     | Organization dimension |                 |                  |                                |                                |                  |                  |                            |          |                             | Environment dimension |                                  |                               |                              | Indicator                     | Reliability                 |                                     |               |
| ID  | Author                         | Lifecycle dimension<br>(see Activity A2) | Goal dimension<br>(see Activity A3) | Value contribution                     |                    | Repetitive-ness |            | Knowledge intensity |                         | Creativity               |                | Inter-dependence |                     | Variability            |                 | Scope            |                                | Industry                       |                  | Size             |                            | Culture  |                             | Resources             |                                  | Competitive-ness              |                              | Uncertainty                   |                             | Degree of context specificity (DCS) | Cohen's Kappa |
|     |                                |                                          |                                     | Core process                           | Management process | Support process | Repetitive | Non-repetitive      | Low knowledge-intensity | High knowledge-intensity | Low creativity | High creativity  | Low interdependence | High interdependence   | Low variability | High variability | Intra-organizational processes | Inter-organizational processes | Product industry | Service industry | Product & service industry | Start-up | Small and medium enterprise | Large organization    | Culture highly supportive of BPM | Culture non-supportive of BPM | Low organizational resources | High organizational resources | Low competitive environment |                                     |               |
| 1   | Abe and Kudo 2014              | Monitoring                               | Exploitation                        | -                                      | -                  | -               | -          | -                   | -                       | -                        | -              | -                | -                   | -                      | -               | -                | -                              | -                              | -                | -                | -                          | -        | -                           | -                     | -                                | -                             | -                            | -                             | -                           | 6%                                  | 78%           |
| 2   | Accorsi et al. 2015            | Monitoring                               | Exploitation                        | -                                      | -                  | -               | -          | -                   | -                       | -                        | -              | -                | -                   | -                      | -               | -                | -                              | -                              | -                | -                | -                          | -        | -                           | -                     | -                                | -                             | -                            | -                             | -                           | 3%                                  | 65%           |
| 7   | Bala et al. 2015               | Monitoring                               | Exploitation                        | a                                      | -                  | -               | a          | -                   | -                       | -                        | -              | -                | -                   | -                      | -               | -                | -                              | a                              | na               | a                | -                          | -        | -                           | -                     | -                                | -                             | -                            | -                             | -                           | 15%                                 | 68%           |
| 8   | Bala et al. 2017               | Monitoring                               | Exploitation                        | -                                      | -                  | -               | -          | -                   | -                       | -                        | -              | -                | -                   | -                      | -               | -                | -                              | -                              | -                | -                | -                          | -        | -                           | -                     | -                                | -                             | -                            | -                             | -                           | 12%                                 | 63%           |
| 11  | Bolsinger et al. 2015          | Monitoring                               | Exploitation                        | -                                      | -                  | -               | a          | na                  | -                       | -                        | -              | -                | -                   | -                      | -               | -                | -                              | -                              | -                | -                | -                          | -        | -                           | -                     | -                                | -                             | -                            | -                             | 20%                         | 69%                                 |               |
| 12  | Bolt et al. 2018               | Monitoring                               | Exploitation                        | -                                      | -                  | -               | -          | -                   | -                       | -                        | -              | -                | -                   | -                      | -               | -                | -                              | -                              | -                | -                | -                          | -        | -                           | -                     | -                                | -                             | -                            | -                             | -                           | 10%                                 | 79%           |
| 13  | Borkowski et al. 2017          | Monitoring                               | Exploitation                        | a                                      | -                  | -               | a          | -                   | -                       | -                        | -              | -                | -                   | -                      | -               | -                | -                              | -                              | -                | -                | -                          | -        | -                           | -                     | -                                | -                             | -                            | -                             | -                           | 15%                                 | 62%           |
| 15  | Breuker et al. 2016            | Monitoring                               | Exploitation                        | a                                      | na                 | -               | a          | na                  | -                       | -                        | -              | -                | -                   | -                      | -               | -                | -                              | -                              | -                | -                | -                          | -        | -                           | -                     | -                                | -                             | -                            | -                             | -                           | 35%                                 | 89%           |
| 16  | Cabanillas et al. 2014         | Monitoring                               | Exploitation                        | -                                      | -                  | -               | a          | -                   | -                       | -                        | -              | -                | -                   | -                      | -               | -                | -                              | -                              | -                | -                | -                          | -        | -                           | -                     | -                                | -                             | -                            | -                             | -                           | 7%                                  | 79%           |
| 18  | Cuzzocrea et al. 2018          | Monitoring                               | Exploitation                        | -                                      | -                  | -               | a          | -                   | -                       | -                        | -              | -                | -                   | -                      | -               | -                | -                              | -                              | -                | -                | -                          | -        | -                           | -                     | -                                | -                             | -                            | -                             | -                           | 14%                                 | 71%           |
| 26  | di Francescomarino et al. 2017 | Monitoring                               | Exploitation                        | -                                      | -                  | -               | a          | -                   | -                       | -                        | -              | -                | -                   | -                      | -               | -                | -                              | -                              | -                | -                | -                          | -        | -                           | -                     | -                                | -                             | -                            | -                             | -                           | 10%                                 | 79%           |
| 27  | Dijkman and Wibik 2017         | Monitoring                               | Exploitation                        | -                                      | -                  | -               | a          | -                   | -                       | -                        | -              | -                | -                   | -                      | -               | -                | -                              | -                              | -                | -                | -                          | -        | -                           | -                     | -                                | -                             | -                            | -                             | -                           | 12%                                 | 64%           |
| 34  | Gómez-López et al. 2015        | Monitoring                               | Exploitation                        | -                                      | -                  | -               | -          | -                   | -                       | -                        | -              | -                | -                   | -                      | -               | -                | -                              | -                              | -                | -                | -                          | -        | -                           | -                     | -                                | -                             | -                            | -                             | -                           | 6%                                  | 65%           |
| 35  | Graupner et al. 2015           | Monitoring                               | Exploitation                        | -                                      | -                  | -               | -          | -                   | -                       | -                        | -              | -                | -                   | -                      | -               | -                | -                              | -                              | -                | -                | -                          | -        | -                           | -                     | -                                | -                             | -                            | -                             | -                           | 20%                                 | 61%           |
| 47  | Knuplesch et al. 2015          | Monitoring                               | Exploitation                        | -                                      | -                  | -               | -          | -                   | -                       | -                        | -              | -                | -                   | -                      | -               | -                | -                              | -                              | -                | -                | -                          | -        | -                           | -                     | -                                | -                             | -                            | -                             | -                           | 7%                                  | 79%           |
| 48  | Knuplesch et al. 2017          | Monitoring                               | Exploitation                        | -                                      | -                  | -               | -          | -                   | -                       | -                        | -              | -                | -                   | -                      | -               | -                | -                              | -                              | -                | -                | -                          | -        | -                           | -                     | -                                | -                             | -                            | -                             | -                           | 7%                                  | 64%           |
| 63  | Maaradji et al. 2015           | Monitoring                               | Exploitation                        | -                                      | -                  | -               | a          | -                   | -                       | -                        | -              | -                | -                   | -                      | -               | -                | -                              | -                              | -                | -                | -                          | -        | -                           | -                     | -                                | -                             | -                            | -                             | -                           | 19%                                 | 91%           |
| 66  | Mannhard et al. 2016           | Monitoring                               | Exploitation                        | -                                      | -                  | -               | -          | -                   | -                       | -                        | -              | -                | -                   | -                      | -               | -                | -                              | -                              | -                | -                | -                          | -        | -                           | -                     | -                                | -                             | -                            | -                             | -                           | 3%                                  | 65%           |
| 67  | Marjanovic 2016                | Monitoring                               | Exploitation                        | a                                      | -                  | -               | -          | -                   | -                       | -                        | -              | -                | -                   | -                      | -               | -                | -                              | -                              | -                | -                | -                          | -        | -                           | -                     | -                                | -                             | -                            | -                             | -                           | 20%                                 | 80%           |
| 68  | Mehdiyev et al. 2018           | Monitoring                               | Exploitation                        | -                                      | -                  | -               | a          | -                   | -                       | -                        | -              | -                | -                   | -                      | -               | -                | -                              | -                              | -                | -                | -                          | -        | -                           | -                     | -                                | -                             | -                            | -                             | -                           | 10%                                 | 72%           |
| 69  | Meroni et al. 2018             | Monitoring                               | Exploitation                        | a                                      | na                 | na              | -          | -                   | -                       | -                        | -              | -                | -                   | -                      | -               | -                | -                              | -                              | -                | -                | -                          | -        | -                           | -                     | -                                | -                             | -                            | -                             | -                           | 19%                                 | 91%           |
| 70  | Montani and Leonardi 2014      | Monitoring                               | Exploitation                        | -                                      | -                  | -               | -          | -                   | -                       | -                        | -              | -                | -                   | -                      | -               | -                | -                              | -                              | -                | -                | -                          | -        | -                           | -                     | -                                | -                             | -                            | -                             | -                           | 3%                                  | 65%           |
| 73  | Patiniotakis et al. 2017       | Monitoring                               | Exploitation                        | -                                      | -                  | -               | -          | -                   | -                       | -                        | -              | -                | -                   | -                      | -               | -                | -                              | -                              | -                | -                | -                          | -        | -                           | -                     | -                                | -                             | -                            | -                             | -                           | 10%                                 | 100%          |
| 74  | Pentland et al. 2014           | Monitoring                               | Exploitation                        | -                                      | -                  | -               | a          | -                   | -                       | -                        | -              | -                | -                   | -                      | -               | -                | -                              | -                              | -                | -                | -                          | -        | -                           | -                     | -                                | -                             | -                            | -                             | -                           | 24%                                 | 79%           |
| 83  | Rogge-Solti and Weske 2015     | Monitoring                               | Exploitation                        | a                                      | na                 | na              | -          | -                   | -                       | -                        | -              | -                | -                   | -                      | -               | -                | -                              | -                              | -                | -                | -                          | -        | -                           | -                     | -                                | -                             | -                            | -                             | -                           | 19%                                 | 91%           |
| 85  | Salkivar et al. 2016           | Monitoring                               | Exploitation                        | -                                      | -                  | -               | -          | -                   | -                       | -                        | -              | -                | -                   | -                      | -               | -                | -                              | -                              | -                | -                | -                          | -        | -                           | -                     | -                                | -                             | -                            | -                             | -                           | 7%                                  | 100%          |
| 86  | Satyal et al. 2018             | Monitoring                               | Exploitation                        | -                                      | -                  | -               | -          | -                   | -                       | -                        | -              | -                | -                   | -                      | -               | -                | -                              | -                              | -                | -                | -                          | -        | -                           | -                     | -                                | -                             | -                            | -                             | -                           | 13%                                 | 87%           |
| 87  | Seeliger et al. 2016           | Monitoring                               | Exploitation                        | -                                      | -                  | -               | -          | -                   | -                       | -                        | -              | -                | -                   | -                      | -               | -                | -                              | -                              | -                | -                | -                          | -        | -                           | -                     | -                                | -                             | -                            | -                             | -                           | 3%                                  | 100%          |
| 88  | Senderovich et al. 2014        | Monitoring                               | Exploitation                        | -                                      | -                  | -               | -          | -                   | -                       | -                        | -              | -                | -                   | -                      | -               | -                | -                              | -                              | -                | -                | -                          | -        | -                           | -                     | -                                | -                             | -                            | -                             | -                           | 10%                                 | 64%           |
| 89  | Senderovich et al. 2017        | Monitoring                               | Exploitation                        | a                                      | -                  | -               | -          | -                   | -                       | -                        | -              | -                | -                   | -                      | -               | -                | -                              | -                              | -                | -                | -                          | -        | -                           | -                     | -                                | -                             | -                            | -                             | -                           | 18%                                 | 68%           |
| 90  | Senderovich et al. 2018        | Monitoring                               | Exploitation                        | -                                      | -                  | -               | -          | -                   | -                       | -                        | -              | -                | -                   | -                      | -               | -                | -                              | -                              | -                | -                | -                          | -        | -                           | -                     | -                                | -                             | -                            | -                             | -                           | 9%                                  | 100%          |
| 94  | Teinema et al. 2016            | Monitoring                               | Exploration                         | -                                      | -                  | -               | na         | -                   | -                       | -                        | -              | -                | -                   | -                      | -               | -                | -                              | -                              | -                | -                | -                          | -        | -                           | -                     | -                                | -                             | -                            | -                             | -                           | 10%                                 | 63%           |
| 96  | van Beest et al. 2015          | Monitoring                               | Exploitation                        | -                                      | -                  | -               | -          | -                   | -                       | -                        | -              | -                | -                   | -                      | -               | -                | -                              | -                              | -                | -                | -                          | -        | -                           | -                     | -                                | -                             | -                            | -                             | -                           | 6%                                  | 65%           |
| 98  | van der Aa et al. 2018         | Monitoring                               | Exploitation                        | -                                      | -                  | -               | a          | -                   | -                       | -                        | -              | -                | -                   | -                      | -               | -                | -                              | -                              | -                | -                | -                          | -        | -                           | -                     | -                                | -                             | -                            | -                             | -                           | 14%                                 | 71%           |
| 101 | Zahoransky et al. 2016         | Monitoring                               | Exploitation                        | -                                      | -                  | -               | -          | -                   | -                       | -                        | -              | -                | -                   | -                      | -               | -                | -                              | -                              | -                | -                | -                          | -        | -                           | -                     | -                                | -                             | -                            | -                             | -                           | 15%                                 | 71%           |

a applicable to a specific context characteristic

na not applicable to a specific context characteristic

- applicability is not assessable

Figure A-6: Exploitative BPM methods related to the monitoring stage of the BPM lifecycle



| ID | Author                        | Lifecycle dimension<br>(see Activity A2) | Goal dimension<br>(see Activity A3) | Context dimension<br>(see Activity A4) |                    |                 |                 |                     |                         |                          |                |                  |                     |                      |                 |                        |                                |                                |                  |                  |                             |          |                             |                       |                                  |                               |                              | Indicator | Reliability |                               |                             |                              |                               |                                |   |     |      |      |
|----|-------------------------------|------------------------------------------|-------------------------------------|----------------------------------------|--------------------|-----------------|-----------------|---------------------|-------------------------|--------------------------|----------------|------------------|---------------------|----------------------|-----------------|------------------------|--------------------------------|--------------------------------|------------------|------------------|-----------------------------|----------|-----------------------------|-----------------------|----------------------------------|-------------------------------|------------------------------|-----------|-------------|-------------------------------|-----------------------------|------------------------------|-------------------------------|--------------------------------|---|-----|------|------|
|    |                               |                                          |                                     | Process dimension                      |                    |                 |                 |                     |                         |                          |                |                  |                     |                      |                 | Organization dimension |                                |                                |                  |                  |                             |          |                             | Environment dimension |                                  |                               |                              |           |             |                               |                             |                              |                               |                                |   |     |      |      |
|    |                               |                                          |                                     | Value contribution                     |                    |                 | Repetitive-ness | Knowledge intensity |                         | Creativity               |                | Inter-dependence |                     | Variability          |                 | Scope                  |                                | Industry                       |                  | Size             |                             | Culture  |                             | Resources             | Competitive-ness                 |                               | Uncertainty                  |           |             |                               |                             |                              |                               |                                |   |     |      |      |
|    |                               |                                          |                                     | Core process                           | Management process | Support process | Repetitive      | Non-repetitive      | Low knowledge-intensity | High knowledge-intensity | Low creativity | High creativity  | Low interdependence | High interdependence | Low variability | High variability       | Intra-organizational processes | Inter-organizational processes | Product industry | Service industry | Producer & service industry | Start-up | Small and medium enterprise | Large organization    | Culture highly supportive of BPM | Culture non-supportive of BPM | Low organizational resources |           |             | High organizational resources | Low competitive environment | High competitive environment | Low environmental uncertainty | High environmental uncertainty |   |     |      |      |
| 4  | Antunes et al. 2014           | Improvement and innovation               | Exploitation                        | -                                      | -                  | -               | a               | -                   | -                       | -                        | -              | -                | -                   | a                    | -               | -                      | a                              | -                              | -                | -                | -                           | -        | -                           | -                     | -                                | -                             | -                            | -         | -           | -                             | -                           | -                            | -                             | -                              | - | 17% | 67%  |      |
| 9  | Bergener et al. 2015          | Improvement and innovation               | Exploitation                        | -                                      | -                  | -               | a               | na                  | -                       | -                        | -              | -                | -                   | -                    | a               | na                     | a                              | na                             | -                | -                | -                           | na       | -                           | -                     | a                                | a                             | na                           | na        | a           | -                             | a                           | -                            | -                             | -                              | - | 34% | 82%  |      |
| 10 | Bisogno et al. 2016           | Improvement and innovation               | Exploitation                        | a                                      | -                  | -               | a               | -                   | -                       | -                        | -              | -                | a                   | -                    | -               | a                      | na                             | -                              | -                | -                | -                           | -        | -                           | a                     | a                                | na                            | -                            | -         | -           | -                             | -                           | -                            | -                             | -                              | - | 26% | 65%  |      |
| 21 | de Pádua et al. 2014          | Improvement and innovation               | Exploitation                        | -                                      | -                  | -               | a               | -                   | -                       | -                        | -              | -                | -                   | -                    | a               | -                      | a                              | a                              | na               | -                | -                           | -        | -                           | -                     | -                                | -                             | -                            | -         | -           | -                             | -                           | -                            | -                             | -                              | - | 19% | 71%  |      |
| 24 | Denner et al. 2018            | Improvement and innovation               | Exploitation                        | a                                      | na                 | a               | a               | -                   | -                       | -                        | -              | -                | -                   | -                    | -               | na                     | a                              | na                             | a                | a                | a                           | na       | a                           | a                     | a                                | -                             | na                           | a         | na          | a                             | na                          | a                            | na                            | a                              | - | -   | 41%  | 94%  |
| 41 | Imgrund et al. 2017           | Improvement and innovation               | Exploitation                        | -                                      | -                  | -               | -               | -                   | -                       | -                        | -              | -                | -                   | -                    | -               | -                      | -                              | -                              | -                | -                | -                           | -        | -                           | -                     | -                                | -                             | -                            | -         | -           | -                             | -                           | -                            | -                             | -                              | - | -   | 3%   | 100% |
| 45 | Khelif et al. 2017            | Improvement and innovation               | Exploitation                        | -                                      | -                  | -               | a               | -                   | -                       | -                        | -              | -                | -                   | -                    | a               | -                      | -                              | a                              | -                | -                | -                           | -        | -                           | -                     | a                                | a                             | a                            | -         | -           | a                             | -                           | -                            | -                             | -                              | - | 18% | 84%  |      |
| 46 | Khosravi 2016                 | Improvement and innovation               | Exploitation                        | -                                      | -                  | -               | -               | -                   | -                       | -                        | -              | -                | -                   | -                    | -               | -                      | -                              | a                              | a                | -                | -                           | -        | na                          | -                     | a                                | a                             | na                           | na        | a           | na                            | a                           | -                            | -                             | -                              | - | 27% | 100% |      |
| 61 | Low et al. 2017               | Improvement and innovation               | Exploitation                        | -                                      | -                  | -               | -               | -                   | -                       | -                        | -              | -                | -                   | -                    | -               | a                      | -                              | -                              | -                | -                | -                           | -        | -                           | -                     | -                                | -                             | -                            | -         | -           | -                             | -                           | -                            | -                             | -                              | - | -   | 3%   | 65%  |
| 75 | Pereira Librelato et al. 2014 | Improvement and innovation               | Exploitation                        | a                                      | na                 | na              | a               | -                   | -                       | -                        | -              | -                | -                   | -                    | -               | na                     | a                              | na                             | a                | na               | a                           | -        | -                           | -                     | -                                | -                             | -                            | -         | -           | -                             | -                           | -                            | -                             | -                              | - | -   | 31%  | 62%  |
| 77 | Polpinij et al. 2015          | Improvement and innovation               | Exploitation                        | a                                      | na                 | -               | a               | -                   | -                       | -                        | -              | -                | -                   | -                    | a               | a                      | -                              | a                              | na               | -                | -                           | -        | na                          | -                     | a                                | a                             | na                           | na        | a           | -                             | a                           | -                            | -                             | -                              | - | -   | 35%  | 83%  |
| 93 | Tax et al. 2018               | Improvement and innovation               | Exploitation                        | -                                      | -                  | -               | -               | -                   | -                       | -                        | -              | -                | -                   | -                    | a               | -                      | a                              | -                              | -                | -                | -                           | -        | -                           | -                     | -                                | -                             | -                            | -         | -           | -                             | -                           | -                            | -                             | -                              | - | -   | 14%  | 89%  |

a applicable to a specific context characteristic

na not applicable to a specific context characteristic

- applicability is not assessable

Figure A-7: Exploitative BPM methods related to the improvement and innovation stage of the BPM lifecycle

| ID  | Author                   | Lifecycle dimension<br>(see Activity A2) | Goal dimension<br>(see Activity A3) | Context dimension<br>(see Activity A4) |                    |                 |                 |                     |                         |                          |                |                  |                     |                      |                 |                        |                                |                                |                  |                  |                            |          |                             |                    |                                  |                               |                              |                               |                             |                              |                               |                                |      | Indicator | Reliability |
|-----|--------------------------|------------------------------------------|-------------------------------------|----------------------------------------|--------------------|-----------------|-----------------|---------------------|-------------------------|--------------------------|----------------|------------------|---------------------|----------------------|-----------------|------------------------|--------------------------------|--------------------------------|------------------|------------------|----------------------------|----------|-----------------------------|--------------------|----------------------------------|-------------------------------|------------------------------|-------------------------------|-----------------------------|------------------------------|-------------------------------|--------------------------------|------|-----------|-------------|
|     |                          |                                          |                                     | Process dimension                      |                    |                 |                 |                     |                         |                          |                |                  |                     |                      |                 | Organization dimension |                                |                                |                  |                  |                            |          |                             |                    |                                  |                               |                              | Environment dimension         |                             |                              |                               |                                |      |           |             |
|     |                          |                                          |                                     | Value contribution                     |                    |                 | Repetitive-ness | Knowledge intensity |                         | Creativity               |                | Inter-dependence |                     | Variability          |                 | Scope                  |                                | Industry                       |                  | Size             |                            | Culture  | Resources                   | Competitiveness    |                                  | Uncertainty                   |                              |                               |                             |                              |                               |                                |      |           |             |
|     |                          |                                          |                                     | Core process                           | Management process | Support process | Repetitive      | Non-repetitive      | Low knowledge-intensity | High knowledge-intensity | Low creativity | High creativity  | Low interdependence | High interdependence | Low variability | High variability       | Intra-organizational processes | Inter-organizational processes | Product industry | Service industry | Product & service industry | Start-up | Small and medium enterprise | Large organization | Culture highly supportive of BPM | Culture non-supportive of BPM | Low organizational resources | High organizational resources | Low competitive environment | High competitive environment | Low environmental uncertainty | High environmental uncertainty |      |           |             |
| 103 | CAMAS Method             | Project management                       | Exploitation                        | a                                      | a                  | a               | a               | a                   | a                       | a                        | a              | a                | a                   | a                    | a               | a                      | a                              | a                              | a                | a                | a                          | a        | a                           | a                  | a                                | a                             | a                            | a                             | a                           | a                            | a                             | a                              | 0%   | 100%      |             |
| 19  | de Boer et al. 2015      | Project management                       | Exploitation                        | -                                      | a                  | -               | -               | -                   | -                       | -                        | -              | -                | -                   | -                    | -               | a                      | na                             | -                              | -                | -                | na                         | -        | a                           | a                  | na                               | -                             | -                            | -                             | -                           | -                            | -                             | 21%                            | 71%  |           |             |
| 32  | Fiorentino 2016          | Project management                       | Exploitation                        | -                                      | a                  | -               | -               | -                   | -                       | -                        | -              | -                | -                   | -                    | -               | a                      | a                              | -                              | -                | -                | -                          | -        | -                           | -                  | -                                | -                             | -                            | a                             | -                           | -                            | -                             | 12%                            | 67%  |           |             |
| 36  | Hakim et al. 2016        | Project management                       | Exploitation                        | -                                      | -                  | -               | -               | -                   | -                       | -                        | -              | -                | -                   | -                    | -               | a                      | na                             | -                              | -                | -                | -                          | -        | a                           | -                  | -                                | a                             | -                            | a                             | -                           | -                            | -                             | 15%                            | 68%  |           |             |
| 52  | Lavikka et al. 2015      | Project management                       | Exploitation                        | -                                      | -                  | -               | -               | -                   | -                       | -                        | -              | -                | -                   | -                    | -               | na                     | a                              | na                             | a                | na               | -                          | -        | a                           | na                 | -                                | -                             | -                            | a                             | -                           | -                            | a                             | 25%                            | 81%  |           |             |
| 53  | Lehnert et al. 2014      | Project management                       | Exploitation                        | -                                      | -                  | -               | a               | -                   | -                       | -                        | -              | -                | -                   | -                    | -               | a                      | na                             | -                              | -                | -                | -                          | -        | a                           | -                  | -                                | a                             | -                            | -                             | -                           | -                            | -                             | 15%                            | 67%  |           |             |
| 54  | Lehnert et al. 2018      | Project management                       | Exploitation                        | a                                      | -                  | a               | -               | -                   | -                       | -                        | -              | -                | na                  | a                    | na              | a                      | a                              | -                              | -                | -                | -                          | -        | -                           | -                  | -                                | -                             | -                            | -                             | -                           | -                            | -                             | 20%                            | 92%  |           |             |
| 58  | Linhart et al. 2015a     | Project management                       | Exploitation                        | -                                      | -                  | -               | -               | -                   | -                       | -                        | -              | -                | -                   | -                    | -               | -                      | -                              | -                              | -                | -                | -                          | -        | a                           | -                  | -                                | -                             | -                            | -                             | -                           | -                            | -                             | 3%                             | 100% |           |             |
| 59  | Linhart et al. 2015b     | Project management                       | Exploitation                        | a                                      | na                 | na              | na              | -                   | -                       | -                        | -              | -                | -                   | na                   | a               | -                      | -                              | na                             | a                | a                | -                          | -        | -                           | -                  | -                                | -                             | -                            | -                             | -                           | na                           | a                             | 33%                            | 77%  |           |             |
| 65  | Manderscheid et al. 2015 | Project management                       | Exploitation                        | -                                      | -                  | -               | a               | -                   | -                       | -                        | -              | -                | -                   | -                    | a               | -                      | -                              | -                              | -                | -                | -                          | -        | -                           | -                  | -                                | -                             | -                            | -                             | -                           | -                            | -                             | 6%                             | 65%  |           |             |
| 82  | Rocha et al. 2015        | Project management                       | Exploitation                        | na                                     | a                  | na              | a               | -                   | -                       | -                        | -              | -                | -                   | a                    | na              | a                      | na                             | -                              | -                | -                | -                          | -        | -                           | -                  | na                               | a                             | -                            | a                             | -                           | -                            | 32%                           | 94%                            |      |           |             |

a applicable to a specific context characteristic

na not applicable to a specific context characteristic

- applicability is not assessable

**Figure A-8:** Exploitative BPM methods related to the project management stage of the BPM lifecycle

| ID | Author              | Lifecycle dimension<br>(see Activity A2) | Goal dimension<br>(see Activity A3) | Context dimension<br>(see Activity A4) |                    |                 |                 |                     |                         |                          |                |                  |                     |                      |                 |                        |                                |                                |                  |                  |                            |          |                             |                       |                                  |                               |                              | Indicator | Reliability |                               |                             |                              |                               |                                |     |      |
|----|---------------------|------------------------------------------|-------------------------------------|----------------------------------------|--------------------|-----------------|-----------------|---------------------|-------------------------|--------------------------|----------------|------------------|---------------------|----------------------|-----------------|------------------------|--------------------------------|--------------------------------|------------------|------------------|----------------------------|----------|-----------------------------|-----------------------|----------------------------------|-------------------------------|------------------------------|-----------|-------------|-------------------------------|-----------------------------|------------------------------|-------------------------------|--------------------------------|-----|------|
|    |                     |                                          |                                     | Process dimension                      |                    |                 |                 |                     |                         |                          |                |                  |                     |                      |                 | Organization dimension |                                |                                |                  |                  |                            |          |                             | Environment dimension |                                  |                               |                              |           |             |                               |                             |                              |                               |                                |     |      |
|    |                     |                                          |                                     | Value contribution                     |                    |                 | Repetitive-ness | Knowledge intensity |                         | Creativity               |                | Inter-dependence |                     | Variability          |                 | Scope                  |                                | Industry                       |                  | Size             |                            | Culture  |                             | Resources             |                                  | Competitive-ness              |                              |           |             | Uncertainty                   |                             |                              |                               |                                |     |      |
|    |                     |                                          |                                     | Core process                           | Management process | Support process | Repetitive      | Non-repetitive      | Low knowledge-intensity | High knowledge-intensity | Low creativity | High creativity  | Low interdependence | High interdependence | Low variability | High variability       | Intra-organizational processes | Inter-organizational processes | Product industry | Service industry | Product & service industry | Start-up | Small and medium enterprise | Large organization    | Culture highly supportive of BPM | Culture non-supportive of BPM | Low organizational resources |           |             | High organizational resources | Low competitive environment | High competitive environment | Low environmental uncertainty | High environmental uncertainty |     |      |
| 5  | Appel et al. 2014   | Design                                   | Exploration                         | -                                      | -                  | -               | a               | -                   | -                       | -                        | -              | -                | -                   | -                    | a               | na                     | -                              | -                              | -                | -                | -                          | -        | -                           | -                     | -                                | -                             | -                            | -         | -           | -                             | -                           | -                            | -                             | -                              | 10% | 79%  |
| 84 | Ruiz et al. 2015    | Design                                   | Exploration                         | -                                      | -                  | -               | -               | -                   | -                       | -                        | -              | -                | -                   | -                    | -               | -                      | -                              | -                              | -                | -                | -                          | -        | -                           | -                     | -                                | -                             | -                            | -         | -           | -                             | -                           | -                            | -                             | -                              | 9%  | 100% |
| 57 | Lindman et al. 2016 | Implementation                           | Exploration                         | a                                      | na                 | na              | -               | -                   | -                       | -                        | -              | -                | -                   | -                    | -               | -                      | a                              | -                              | -                | -                | -                          | -        | -                           | -                     | -                                | -                             | na                           | a         | na          | a                             | -                           | -                            | -                             | -                              | 24% | 76%  |
| 95 | Trkman et al. 2015  | Implementation                           | Exploration                         | a                                      | na                 | na              | -               | -                   | -                       | -                        | -              | -                | -                   | -                    | -               | -                      | na                             | a                              | -                | -                | -                          | -        | -                           | -                     | -                                | -                             | -                            | -         | -           | -                             | -                           | -                            | -                             | -                              | 23% | 85%  |

a applicable to a specific context characteristic     
na not applicable to a specific context characteristic     
- applicability is not assessable

**Figure A-9:** Explorative BPM methods related to all stages of the BPM lifecycle

## Appendix 4 – Questionnaire for applying the Assessment Process

### *Lifecycle dimension*

For which BPM lifecycle stage is your BPM method applicable (multiple answers possible)?

| BPM lifecycle stage          | Definition                                                                                                                                       | Assess your method (please insert “x”) |
|------------------------------|--------------------------------------------------------------------------------------------------------------------------------------------------|----------------------------------------|
| Design & modelling           | <ul style="list-style-type: none"> <li>Conceptualize as-is and to-be processes</li> </ul>                                                        |                                        |
| Implementation & execution   | <ul style="list-style-type: none"> <li>Create executable specifications</li> </ul>                                                               |                                        |
| Monitoring & control         | <ul style="list-style-type: none"> <li>Collect and consolidate process data</li> <li>Monitor the execution of processes</li> </ul>               |                                        |
| Improvement & innovation     | <ul style="list-style-type: none"> <li>Develop improved business processes</li> <li>Radically change existing or create new processes</li> </ul> |                                        |
| Project & program management | <ul style="list-style-type: none"> <li>Evaluate the methods that are used for enterprise-wide BPM and specific BPM projects</li> </ul>           |                                        |

### *Goal dimension*

For which BPM goal is your BPM method applicable (multiple answers possible)?

| BPM goal     | Definition                                                                                                                                        | Assess your method (please insert “x”) |
|--------------|---------------------------------------------------------------------------------------------------------------------------------------------------|----------------------------------------|
| Exploitation | Exploitative BPM is inward-looking and problem-driven, striving for efficiency through the continuous improvement of existing business processes. |                                        |
| Exploration  | Explorative BPM is outward-looking and opportunity-driven, striving for increased future revenue through the business process innovation.         |                                        |

### *Context dimension*

For which BPM context is your BPM method applicable? Please determine for each context characteristic whether your BPM method is applicable or is not applicable (*Note: For each context factor, e.g., value contribution, at least one characteristic must be assessed with “a”; all other characteristics can then be assessed with “a” or “na”*):

- (a): the BPM method **applies** to a specific context characteristic.
- (na): the BPM method is **not applicable** to a specific context characteristic.

| Context factor    | Definition                                                                       | Context characteristics | Assess your method (please insert “a” or “na”) |
|-------------------|----------------------------------------------------------------------------------|-------------------------|------------------------------------------------|
| Process dimension | Value contribution<br>Value a process creates for internal or external customers | Core process            |                                                |
|                   |                                                                                  | Management process      |                                                |
|                   |                                                                                  | Support process         |                                                |
|                   | Repetitiveness<br>Execution frequency of a process                               | Repetitive              |                                                |
|                   |                                                                                  | Non-repetitive          |                                                |

|                        |                     |                                                                 |                                  |  |
|------------------------|---------------------|-----------------------------------------------------------------|----------------------------------|--|
|                        | Knowledge intensity | Knowledge a process requires from process participants          | Low knowledge-intensity          |  |
|                        |                     |                                                                 | High knowledge-intensity         |  |
|                        | Creativity          | Creativity a process requires from process participants         | Low creativity                   |  |
|                        |                     |                                                                 | High creativity                  |  |
|                        | Interdependence     | Relationships among processes                                   | Low interdependence              |  |
|                        |                     |                                                                 | High interdependence             |  |
|                        | Variability         | Amount of variants of a process                                 | Low variability                  |  |
|                        |                     |                                                                 | High variability                 |  |
| Organization dimension | Scope               | Scope in which BPM is applied                                   | Intra-organizational processes   |  |
|                        |                     |                                                                 | Inter-organizational processes   |  |
|                        | Industry            | Industry in which BPM is applied                                | Product industry                 |  |
|                        |                     |                                                                 | Service Industry                 |  |
|                        |                     |                                                                 | Product & Service Industry       |  |
|                        | Size                | Size of the organization in which BPM is applied                | Start-up                         |  |
|                        |                     |                                                                 | Small and medium enterprise      |  |
|                        |                     |                                                                 | Large organization               |  |
|                        | Culture             | Degree to which an organization's culture is supportive of BPM  | Culture highly supportive of BPM |  |
|                        |                     |                                                                 | Culture non-supportive of BPM    |  |
|                        | Resources           | Available resources for BPM (e.g., personnel or IT investments) | Low organizational resources     |  |
|                        |                     |                                                                 | High organizational resources    |  |
| Environment dimension  | Competitiveness     | Degree of competitive pressure                                  | Low competitive environment      |  |
|                        |                     |                                                                 | High competitive environment     |  |
|                        | Uncertainty         | Degree of environmental uncertainty                             | Low environmental uncertainty    |  |
|                        |                     |                                                                 | High environmental uncertainty   |  |

### ***Evaluation Assessment Process***

Do you think the Assessment Process included in the CAMAS Method is *easy to use* to assess BPM methods in a context-aware manner? Please assess the ease of use at a 7-point scale (1 – very difficult to use; 7 – very easy to use):

1    2    3    4    5    6    7

Do you have any further comments? Please comment in 1-2 sentences:

## Appendix 5 – Comparison assessment results co-authors and BPM method engineers

To get insights into the validity of the assessment performed by the co-authors, we compared their classification with the original BPM method engineers and calculated hit ratios (Moore and Benbasat 1991). Hit ratios measure the frequency of correctly assigned objects (Nahm et al. 2002).  $H$  is defined as:

$$H = \frac{h}{N}$$

with  $h$  = amount of correct “hits”

$N$  = amount of units to be assessed

We calculated hit ratios for each BPM method assessed by BPM method engineers and co-authors, as shown in Figure A-X. For example, the hit ratio for the BPM method proposed Bala et al. (2017), is calculated as follows:

$$H = \frac{29}{31} = 0.94 \quad \text{with } h = 29 \text{ and } N = 31$$

|     |                           |                                         | Context dimension (see Activity 4) |              |                    |                 |            |                     |                         |                          |                |                  |                     |                      |                        |                  |                                |                                |                  |                  |                            |          |                             |                    |                                  |                               | Validity |                              |                               |                             |                              |                               |
|-----|---------------------------|-----------------------------------------|------------------------------------|--------------|--------------------|-----------------|------------|---------------------|-------------------------|--------------------------|----------------|------------------|---------------------|----------------------|------------------------|------------------|--------------------------------|--------------------------------|------------------|------------------|----------------------------|----------|-----------------------------|--------------------|----------------------------------|-------------------------------|----------|------------------------------|-------------------------------|-----------------------------|------------------------------|-------------------------------|
|     |                           |                                         | Process dimension                  |              |                    |                 |            |                     |                         |                          |                |                  |                     |                      | Organization dimension |                  |                                |                                |                  |                  |                            |          | Environment dimension       |                    |                                  |                               |          |                              |                               |                             |                              |                               |
|     |                           |                                         | Value contribution                 |              |                    | Repetitive-ness |            | Knowledge intensity |                         | Creativity               |                | Inter-dependence |                     | Variability          |                        | Scope            |                                | Industry                       |                  | Size             |                            | Culture  |                             | Resources          |                                  | Competitiveness               |          | Uncertainty                  |                               |                             |                              |                               |
| ID  | Author                    | Lifecycle dimension (see Activity A2)   | Goal dimension (see Activity A3)   | Core process | Management process | Support process | Repetitive | Non-repetitive      | Low knowledge-intensity | High knowledge-intensity | Low creativity | High creativity  | Low interdependence | High interdependence | Low variability        | High variability | Intra-organizational processes | Inter-organizational processes | Product industry | Service industry | Product & service industry | Start-up | Small and medium enterprise | Large organization | Culture highly supportive of BPM | Culture non-supportive of BPM |          | Low organizational resources | High organizational resources | Low competitive environment | High competitive environment | Low environmental uncertainty |
| 7   | Bala et al. 2015*         | Monitoring / Project Management         | Exploitation                       | a            | na                 | na              | na         | a                   | na                      | a                        | na             | a                | na                  | a                    | na                     | a                | na                             | na                             | na               | na               | a                          | a        | a                           | a                  | a                                | na                            | na       | a                            | a                             | a                           | a                            | na                            |
|     | Bala et al. 2015          | Monitoring                              | Exploitation                       | a            | -                  | -               | a          | -                   | -                       | -                        | -              | -                | -                   | -                    | -                      | -                | -                              | -                              | a                | na               | a                          | -        | -                           | -                  | -                                | -                             | -        | -                            | -                             | -                           | -                            | -                             |
| 8   | Bala et al. 2017*         | Monitoring                              | Exploitation                       | a            | a                  | a               | na         | a                   | na                      | a                        | na             | a                | a                   | a                    | a                      | a                | a                              | na                             | a                | a                | a                          | a        | a                           | a                  | a                                | a                             | a        | a                            | a                             | a                           | a                            | a                             |
|     | Bala et al. 2017          | Monitoring                              | Exploitation                       | -            | -                  | -               | -          | -                   | -                       | a                        | -              | a                | -                   | a                    | -                      | a                | -                              | -                              | -                | -                | -                          | -        | -                           | -                  | -                                | -                             | -        | -                            | -                             | -                           | -                            | -                             |
| 9   | Bergener et al. 2015*     | Design / Improvement and innovation     | Exploitation                       | a            | na                 | a               | a          | na                  | a                       | na                       | a              | na               | a                   | a                    | a                      | a                | a                              | a                              | a                | a                | a                          | a        | na                          | a                  | a                                | a                             | na       | a                            | a                             | a                           | a                            | na                            |
|     | Bergener et al. 2015      | Improvement and innovation              | Exploitation                       | -            | -                  | -               | a          | na                  | -                       | -                        | -              | -                | -                   | -                    | -                      | a                | a                              | na                             | -                | -                | -                          | na       | -                           | a                  | a                                | na                            | na       | a                            | -                             | -                           | -                            | a                             |
| 11  | Bolsinger et al. 2015*    | Monitoring                              | Exploitation                       | a            | na                 | a               | a          | na                  | a                       | a                        | na             | a                | na                  | a                    | na                     | a                | na                             | a                              | na               | a                | a                          | a        | na                          | a                  | a                                | a                             | a        | a                            | a                             | a                           | a                            | na                            |
|     | Bolsinger et al. 2015     | Monitoring                              | Exploitation                       | -            | -                  | -               | a          | na                  | -                       | -                        | -              | -                | -                   | na                   | -                      | a                | a                              | -                              | -                | -                | -                          | na       | -                           | -                  | -                                | -                             | -        | -                            | a                             | -                           | -                            | -                             |
| 15  | Breuker et al. 2016*      | Monitoring / Improvement and innovation | Exploitation                       | a            | na                 | a               | a          | na                  | a                       | na                       | a              | na               | a                   | a                    | a                      | a                | a                              | a                              | a                | a                | a                          | a        | na                          | a                  | a                                | a                             | na       | a                            | a                             | a                           | a                            | na                            |
|     | Breuker et al. 2016       | Monitoring                              | Exploitation                       | a            | na                 | -               | a          | na                  | -                       | -                        | -              | -                | a                   | -                    | a                      | -                | a                              | na                             | -                | -                | -                          | na       | -                           | a                  | a                                | na                            | na       | a                            | -                             | -                           | -                            | a                             |
| 16  | Cabanillas et al. 2014*   | Monitoring                              | Exploitation                       | a            | a                  | a               | a          | na                  | a                       | a                        | na             | a                | a                   | na                   | a                      | a                | a                              | na                             | a                | a                | a                          | a        | a                           | a                  | a                                | na                            | na       | a                            | a                             | a                           | a                            | na                            |
|     | Cabanillas et al. 2014    | Monitoring                              | Exploitation                       | -            | -                  | -               | a          | -                   | -                       | -                        | -              | -                | -                   | -                    | -                      | na               | -                              | -                              | -                | -                | -                          | -        | -                           | -                  | -                                | -                             | -        | -                            | -                             | -                           | -                            | -                             |
| 24  | Denner et al. 2018        | Improvement and innovation              | Exploitation                       | a            | na                 | a               | a          | a                   | a                       | a                        | na             | a                | na                  | a                    | na                     | a                | na                             | a                              | na               | a                | a                          | a        | na                          | a                  | a                                | a                             | na       | na                           | a                             | a                           | a                            | a                             |
|     | Denner et al. 2018        | Improvement and innovation              | Exploitation                       | a            | na                 | a               | a          | a                   | a                       | a                        | na             | a                | na                  | a                    | na                     | a                | na                             | a                              | na               | a                | a                          | a        | na                          | a                  | a                                | a                             | na       | na                           | a                             | a                           | a                            | a                             |
| 38  | Heinrich and Schön 2015*  | Design / Improvement and innovation     | Exploitation / Exploration         | a            | a                  | a               | a          | a                   | na                      | a                        | na             | a                | a                   | a                    | a                      | a                | a                              | a                              | a                | a                | a                          | a        | a                           | a                  | a                                | na                            | a        | a                            | a                             | a                           | a                            | a                             |
|     | Heinrich and Schön 2015   | Design                                  | Exploitation                       | -            | -                  | -               | -          | -                   | a                       | -                        | a              | -                | -                   | a                    | -                      | na               | -                              | a                              | -                | -                | -                          | -        | -                           | -                  | -                                | -                             | -        | -                            | -                             | -                           | -                            | a                             |
| 41  | Imgrund et al. 2017*      | Design / Improvement and innovation     | Exploitation                       | na           | a                  | a               | a          | na                  | a                       | na                       | a              | a                | a                   | na                   | a                      | a                | a                              | na                             | a                | a                | a                          | na       | a                           | a                  | a                                | a                             | a        | a                            | a                             | a                           | a                            | a                             |
|     | Imgrund et al. 2017       | Improvement and innovation              | Exploitation                       | -            | -                  | -               | -          | -                   | -                       | -                        | -              | -                | -                   | -                    | -                      | -                | -                              | -                              | -                | -                | -                          | -        | -                           | -                  | -                                | -                             | -        | -                            | -                             | -                           | -                            | -                             |
| 45  | Khelif et al. 2017*       | Design / Improvement and innovation     | Exploitation                       | a            | na                 | a               | a          | na                  | a                       | a                        | na             | a                | na                  | a                    | na                     | a                | na                             | a                              | na               | a                | a                          | a        | na                          | a                  | na                               | a                             | a        | a                            | a                             | a                           | na                           | na                            |
|     | Khelif et al. 2017        | Improvement and innovation              | Exploitation                       | -            | -                  | -               | a          | -                   | -                       | -                        | -              | -                | -                   | a                    | -                      | -                | a                              | -                              | -                | -                | -                          | -        | a                           | a                  | a                                | -                             | -        | a                            | -                             | -                           | -                            | -                             |
| 50  | La Rosa et al. 2015*      | Design                                  | Exploitation / Exploration         | a            | na                 | a               | a          | na                  | a                       | na                       | a              | na               | a                   | a                    | a                      | a                | na                             | a                              | a                | a                | a                          | na       | na                          | a                  | a                                | na                            | na       | a                            | a                             | a                           | a                            | na                            |
|     | La Rosa et al. 2015       | Design                                  | Exploitation                       | -            | -                  | -               | -          | -                   | -                       | -                        | -              | -                | -                   | -                    | -                      | a                | a                              | na                             | -                | -                | -                          | -        | -                           | -                  | -                                | -                             | -        | -                            | -                             | -                           | -                            | -                             |
| 53  | Lehnert et al. 2014*      | Project management                      | Exploitation                       | a            | na                 | a               | a          | a                   | a                       | a                        | a              | a                | na                  | a                    | a                      | a                | na                             | a                              | a                | a                | a                          | na       | a                           | a                  | a                                | na                            | a        | a                            | a                             | a                           | a                            | na                            |
|     | Lehnert et al. 2014       | Project management                      | Exploitation                       | -            | -                  | -               | a          | -                   | -                       | -                        | -              | -                | -                   | -                    | -                      | -                | a                              | na                             | -                | -                | -                          | -        | -                           | -                  | -                                | -                             | -        | -                            | a                             | -                           | -                            | -                             |
| 54  | Lehnert et al. 2018*      | Project management                      | Exploitation                       | a            | na                 | a               | a          | na                  | a                       | a                        | a              | a                | a                   | a                    | a                      | a                | a                              | na                             | a                | a                | a                          | na       | na                          | a                  | a                                | a                             | na       | a                            | a                             | a                           | a                            | na                            |
|     | Lehnert et al. 2018       | Project management                      | Exploitation                       | a            | -                  | -               | -          | -                   | -                       | -                        | -              | na               | a                   | na                   | a                      | a                | -                              | -                              | -                | -                | -                          | -        | -                           | -                  | -                                | -                             | -        | -                            | -                             | -                           | -                            | -                             |
| 58  | Linhart et al. 2015a*     | Project management                      | Exploitation                       | a            | na                 | na              | a          | na                  | a                       | a                        | a              | a                | a                   | na                   | a                      | a                | a                              | na                             | na               | a                | na                         | na       | a                           | a                  | a                                | a                             | na       | a                            | a                             | a                           | a                            | na                            |
|     | Linhart et al. 2015a      | Project management                      | Exploitation                       | -            | -                  | -               | -          | -                   | -                       | -                        | -              | -                | -                   | -                    | -                      | -                | -                              | -                              | -                | -                | -                          | -        | -                           | -                  | -                                | -                             | -        | -                            | -                             | -                           | -                            | -                             |
| 61  | Low et al. 2017*          | Improvement and innovation              | Exploitation                       | a            | a                  | a               | a          | na                  | a                       | a                        | a              | a                | na                  | a                    | a                      | a                | a                              | a                              | a                | a                | a                          | a        | a                           | a                  | a                                | a                             | a        | a                            | a                             | a                           | a                            | na                            |
|     | Low et al. 2017           | Improvement and innovation              | Exploitation                       | -            | -                  | -               | -          | -                   | -                       | -                        | -              | -                | -                   | -                    | -                      | a                | -                              | -                              | -                | -                | -                          | -        | -                           | -                  | -                                | -                             | -        | -                            | -                             | -                           | -                            | -                             |
| 65  | Manderscheid et al. 2015* | Project management                      | Exploitation                       | a            | na                 | na              | a          | a                   | a                       | a                        | a              | a                | na                  | a                    | a                      | a                | na                             | a                              | a                | a                | a                          | na       | a                           | a                  | a                                | a                             | na       | a                            | a                             | a                           | a                            | na                            |
|     | Manderscheid et al. 2015  | Project management                      | Exploitation                       | -            | -                  | -               | a          | -                   | -                       | -                        | -              | -                | -                   | -                    | -                      | -                | a                              | -                              | -                | -                | -                          | -        | -                           | -                  | -                                | -                             | -        | -                            | -                             | -                           | -                            | -                             |
| 94  | Teinema et al. 2016*      | Monitoring / Improvement and innovation | Exploitation                       | a            | na                 | a               | a          | na                  | a                       | a                        | a              | a                | a                   | a                    | a                      | a                | a                              | a                              | na               | a                | a                          | a        | na                          | a                  | a                                | a                             | na       | a                            | a                             | a                           | a                            | a                             |
|     | Teinema et al. 2016       | Monitoring                              | Exploitation                       | -            | -                  | -               | -          | na                  | -                       | -                        | -              | -                | -                   | -                    | -                      | -                | -                              | -                              | -                | -                | -                          | -        | -                           | -                  | -                                | -                             | -        | -                            | -                             | -                           | -                            | -                             |
| 97  | van der Aa et al. 2017*   | Design                                  | Exploitation                       | a            | a                  | a               | a          | a                   | a                       | a                        | a              | a                | a                   | a                    | a                      | a                | a                              | na                             | a                | a                | a                          | na       | a                           | a                  | a                                | a                             | a        | a                            | a                             | a                           | a                            | a                             |
|     | van der Aa et al. 2017    | Design                                  | Exploitation                       | -            | -                  | -               | -          | -                   | a                       | -                        | a              | -                | -                   | -                    | -                      | -                | -                              | -                              | -                | -                | -                          | -        | -                           | -                  | -                                | -                             | -        | -                            | -                             | -                           | -                            | -                             |
| 98  | van der Aa et al. 2018*   | Monitoring                              | Exploitation                       | a            | a                  | a               | a          | a                   | a                       | a                        | a              | a                | a                   | a                    | a                      | a                | a                              | na                             | a                | a                | a                          | na       | a                           | a                  | a                                | a                             | a        | a                            | a                             | a                           | a                            | a                             |
|     | van der Aa et al. 2018    | Monitoring                              | Exploitation                       | -            | -                  | -               | a          | -                   | -                       | -                        | a              | -                | a                   | -                    | a                      | -                | a                              | -                              | -                | -                | -                          | -        | -                           | -                  | -                                | -                             | -        | -                            | -                             | -                           | -                            | -                             |
| 102 | Zhu et al. 2014*          | Design                                  | Exploitation                       | a            | a                  | a               | a          | na                  | a                       | na                       | a              | na               | a                   | a                    | a                      | a                | a                              | na                             | a                | a                | a                          | a        | a                           | a                  | a                                | na                            | na       | a                            | a                             | a                           | a                            | na                            |
|     | Zhu et al. 2014           | Design                                  | Exploitation                       | -            | -                  | -               | a          | -                   | -                       | -                        | -              | -                | -                   | -                    | -                      | -                | a                              | -                              | -                | -                | -                          | -        | -                           | -                  | -                                | -                             | -        | -                            | -                             | -                           | -                            | -                             |

\* BPM method assessed by original BPM method engineer

a applicable to a specific context characteristic

na not applicable to a specific context characteristic

- applicability is not assessable

**Figure A-10:** Comparison assessment results co-authors and BPM method engineers (20 BPM methods)

## Appendix 6 – Results of applying the Selection Process with two organizations

To evaluate the Selection Process, we applied the Selection Process with two BPM method users from two different organizations, a SERVICE and PRODUCT organization, to gain preliminary insights into its ease of use, real-world fidelity, effectiveness, and efficiency. Therefore, we conducted semi-structured interviews along the activities of the Selection Process. Table A-4 summarizes the highlights from the expert interviews, Figures A-11 to A-15 show the results of applying the Selection Process.

**Table A-4:** Highlights from the expert interviews

| Topic                           | Comment                                                                                                                                                                                                                                                                                                                                                                                                                                                                                                                                                                                                                                                                                                                                                                                                                                                                                          | Implications                                                                                                                                                                                                                                                                                                                                                                                                   |
|---------------------------------|--------------------------------------------------------------------------------------------------------------------------------------------------------------------------------------------------------------------------------------------------------------------------------------------------------------------------------------------------------------------------------------------------------------------------------------------------------------------------------------------------------------------------------------------------------------------------------------------------------------------------------------------------------------------------------------------------------------------------------------------------------------------------------------------------------------------------------------------------------------------------------------------------|----------------------------------------------------------------------------------------------------------------------------------------------------------------------------------------------------------------------------------------------------------------------------------------------------------------------------------------------------------------------------------------------------------------|
| <b>Overview</b>                 | <ul style="list-style-type: none"> <li>“In my option, it is crucial that organizations ensure that the applied BPM methods fit their context to ensure efficient use of resources and address internal and external customer needs” (PRODUCTION)</li> <li>“Defining context along multiple dimensions seems promising as it allows for a comprehensive analysis. Therefore, it is important that process-related stakeholder (e.g., process manager) are involved in each activity.” (PRODUCTION)</li> <li>“The Selection Process is a well-founded, yet pragmatic, way to reason about how to select BPM methods. I also liked the details provided for each activity (e.g., techniques, tools, definitions) as they helped to apply the Selection Process properly. Hence, the Selection Process helps to reduce time and uncertainty in selecting suitable BPM methods.” (SERVICE)</li> </ul> | <ul style="list-style-type: none"> <li>Section 5.2: Included in summary of evaluation results.</li> <li>Section 4.4: Hint added that different BPM experts and process managers should be involved when applying the Selection Process.</li> <li>Section 5.2: Included in summary of evaluation results.</li> </ul>                                                                                            |
| <b>Lifecycle dimension</b>      | <ul style="list-style-type: none"> <li>“Defining the lifecycle stage for the process in focus is intuitive and easy for someone who knows the process and is typically involved in BPM.” (PRODUCTION)</li> </ul>                                                                                                                                                                                                                                                                                                                                                                                                                                                                                                                                                                                                                                                                                 | <ul style="list-style-type: none"> <li>Section 5.2: Included in summary of evaluation results.</li> </ul>                                                                                                                                                                                                                                                                                                      |
| <b>Goal dimension</b>           | <ul style="list-style-type: none"> <li>“So far, we only focused on process improvement when applying BPM methods. However, applying BPM methods to create new processes is gaining importance in a digital age.” (SERVICE)</li> </ul>                                                                                                                                                                                                                                                                                                                                                                                                                                                                                                                                                                                                                                                            | <ul style="list-style-type: none"> <li>Section 5.2: Included in summary of evaluation results.</li> </ul>                                                                                                                                                                                                                                                                                                      |
| <b>Context dimension</b>        | <ul style="list-style-type: none"> <li>“Even though it is important, it is difficult to set weights for the different dimensions and characteristics.” (SERVICE)</li> <li>“To analyze <i>DA</i> and <i>DCS</i> effectively, a deeper understanding of what is measured is required.” (PRODUCTION)</li> <li>“Choosing the right process characteristics, is not always easy and needs a lot of knowledge of the process.” (SERVICE)</li> </ul>                                                                                                                                                                                                                                                                                                                                                                                                                                                    | <ul style="list-style-type: none"> <li>Section 4.4: Hint added that the Excel prototype proposes an initial configuration, i.e., all characteristics are equally important. The configuration can be changed as required.</li> <li>Section 4.4 and 5.2: Information added on to interpret <i>DA</i> and <i>DCS</i>.</li> <li>Section 4.4: Hint added that different BPM experts should be involved.</li> </ul> |
| <b>Selection of BPM methods</b> | <ul style="list-style-type: none"> <li>“The Method Base offers a good overview of existing BPM methods as it includes not only well-known BPM methods, but also unknown BPM methods that inspire to consider context from various perspectives.” (PRODUCTION)</li> <li>“The Excel prototype helped to structure the activities that have to be done to select suitable BPM methods. However, it is still a rudimentary prototype. I would appreciate a short summary of the selected BPM method and a direct link that provide more information about the method (e.g., provide respective research article as a PDF file). Moreover, I would like to see a list of the next steps that guide me through the process after I have selected a BPM method.” (SERVICE)</li> </ul>                                                                                                                   | <ul style="list-style-type: none"> <li>Section 5.2: Included in summary of evaluation results.</li> <li>Section 5.2 and 6.3: Included in summary of evaluation results and limitation added to be addressed in further research.</li> </ul>                                                                                                                                                                    |



|    |                          | Context dimension<br>(see Activity S3)   |  |                    |  |                                     |  |                        |  |                  |   |                         |   |                          |   |                |   |                 |   |                       |   |                      |     |                  |   | Indicator<br>(see Activity S4) |   |                                |   |                                |   |                  |   |                  |   |                            |   |          |   |                             |   |                    |   |                                  |   |                               |   |                              |   |                               |   |                             |   |                              |  |                               |  |                                |  |  |  |  |
|----|--------------------------|------------------------------------------|--|--------------------|--|-------------------------------------|--|------------------------|--|------------------|---|-------------------------|---|--------------------------|---|----------------|---|-----------------|---|-----------------------|---|----------------------|-----|------------------|---|--------------------------------|---|--------------------------------|---|--------------------------------|---|------------------|---|------------------|---|----------------------------|---|----------|---|-----------------------------|---|--------------------|---|----------------------------------|---|-------------------------------|---|------------------------------|---|-------------------------------|---|-----------------------------|---|------------------------------|--|-------------------------------|--|--------------------------------|--|--|--|--|
|    |                          | 0,6                                      |  |                    |  |                                     |  |                        |  |                  |   |                         |   | 0,2                      |   |                |   |                 |   |                       |   |                      | 0,2 |                  |   |                                |   |                                |   |                                |   |                  |   |                  |   |                            |   |          |   |                             |   |                    |   |                                  |   |                               |   |                              |   |                               |   |                             |   |                              |  |                               |  |                                |  |  |  |  |
|    |                          | Process dimension                        |  |                    |  |                                     |  | Organization dimension |  |                  |   |                         |   |                          |   |                |   |                 |   | Environment dimension |   |                      |     |                  |   |                                |   |                                |   |                                |   |                  |   |                  |   |                            |   |          |   |                             |   |                    |   |                                  |   |                               |   |                              |   |                               |   |                             |   |                              |  |                               |  |                                |  |  |  |  |
|    |                          | 0,2                                      |  | 0,2                |  | 0,2                                 |  | 0,2                    |  | 0,1              |   | 0,1                     |   | 0,2                      |   | 0,1            |   | 0,1             |   | 0,3                   |   | 0,3                  |     | 0,7              |   | 0,3                            |   |                                |   |                                |   |                  |   |                  |   |                            |   |          |   |                             |   |                    |   |                                  |   |                               |   |                              |   |                               |   |                             |   |                              |  |                               |  |                                |  |  |  |  |
|    |                          | Value contribution                       |  | Repetitive-ness    |  | Knowledge-intensity                 |  | Creativity             |  | Inter-dependence |   | Variability             |   | Scope                    |   | Industry       |   | Size            |   | Culture               |   | Resources            |     | Competitive-ness |   | Uncertainty                    |   |                                |   |                                |   |                  |   |                  |   |                            |   |          |   |                             |   |                    |   |                                  |   |                               |   |                              |   |                               |   |                             |   |                              |  |                               |  |                                |  |  |  |  |
|    |                          | Core process                             |  | Management process |  | Support process                     |  | Repetitive             |  | Non-repetitive   |   | Low knowledge-intensity |   | High knowledge-intensity |   | Low creativity |   | High creativity |   | Low interdependence   |   | High interdependence |     | Low variability  |   | High variability               |   | Intra-organizational processes |   | Inter-organizational processes |   | Product industry |   | Service industry |   | Product & service industry |   | Start-up |   | Small and medium enterprise |   | Large organization |   | Culture highly supportive of BPM |   | Culture non-supportive of BPM |   | Low organizational resources |   | High organizational resources |   | Low competitive environment |   | High competitive environment |  | Low environmental uncertainty |  | High environmental uncertainty |  |  |  |  |
| ID | Author                   | Lifecycle dimension<br>(see Activity S1) |  |                    |  | Goal dimension<br>(see Activity S2) |  |                        |  | 1                |   | 0                       |   | 1                        |   | 0              |   | 1               |   | 0                     |   | 1                    |     | 0                |   | 1                              |   | 0                              |   | 1                              |   | 0                |   | 1                |   | 0                          |   | 1        |   | 0                           |   | 1                  |   | 0                                |   | 1                             |   | 0                            |   | 1                             |   | 0                           |   | 1                            |  |                               |  |                                |  |  |  |  |
| 94 | Teinemaa et al. 2016*    | Improvement and innovation               |  |                    |  | Exploration                         |  |                        |  | 1                | 0 | 1                       | 1 | 0                        | 1 | 1              | 1 | 1               | 1 | 1                     | 1 | 1                    | 1   | 1                | 1 | 1                              | 0 | 1                              | 1 | 1                              | 1 | 1                | 1 | 1                | 1 | 1                          | 1 | 1        | 1 | 1                           | 1 | 1                  | 1 | 1                                | 1 | 1                             | 1 | 1                            | 1 | 1                             | 1 | 78%                         | 1 | 17%                          |  |                               |  |                                |  |  |  |  |
| 38 | Heinrich and Schön 2015* | Improvement and innovation               |  |                    |  | Exploration                         |  |                        |  | 1                | 1 | 1                       | 1 | 1                        | 1 | 0              | 1 | 0               | 1 | 1                     | 1 | 1                    | 1   | 1                | 1 | 1                              | 1 | 1                              | 1 | 1                              | 1 | 1                | 1 | 1                | 1 | 1                          | 1 | 1        | 1 | 1                           | 1 | 1                  | 1 | 1                                | 1 | 1                             | 1 | 1                            | 1 | 1                             | 1 | 76%                         | 2 | 19%                          |  |                               |  |                                |  |  |  |  |

\* BPM method assessed by original BPM method engineer

**Figure A-11:** Results of applying the Selection Process to the process (P1) define and document architecture of SERVICE (risk-averse mode)

|     |                           | Context dimension<br>(see Activity S3)   |              |                                     |   |                    |   |                        |   |                     |   |            |   |                 |   |             |   |       |   |          |   |                       |   |         |   | Indicator<br>(see Activity S4) |   |                 |   |             |   |                              |           |                                     |      |     |     |
|-----|---------------------------|------------------------------------------|--------------|-------------------------------------|---|--------------------|---|------------------------|---|---------------------|---|------------|---|-----------------|---|-------------|---|-------|---|----------|---|-----------------------|---|---------|---|--------------------------------|---|-----------------|---|-------------|---|------------------------------|-----------|-------------------------------------|------|-----|-----|
|     |                           | 0,1                                      |              |                                     |   |                    |   |                        |   |                     |   |            |   | 0,5             |   |             |   |       |   |          |   |                       |   | 0,4     |   |                                |   |                 |   |             |   |                              |           |                                     |      |     |     |
|     |                           | Process dimension                        |              |                                     |   |                    |   | Organization dimension |   |                     |   |            |   |                 |   |             |   |       |   |          |   | Environment dimension |   |         |   |                                |   |                 |   |             |   |                              |           |                                     |      |     |     |
|     |                           | 0,3                                      |              | 0                                   |   | 0,4                |   | 0                      |   | 0,3                 |   | 0          |   | 0,5             |   | 0           |   | 0     |   | 0,3      |   | 0,2                   |   | 0,5     |   | 0,5                            |   |                 |   |             |   |                              |           |                                     |      |     |     |
| ID  | Author                    | Lifecycle dimension<br>(see Activity S1) |              | Goal dimension<br>(see Activity S2) |   | Value contribution |   | Repetitiveness         |   | Knowledge intensity |   | Creativity |   | Interdependence |   | Variability |   | Scope |   | Industry |   | Size                  |   | Culture |   | Resources                      |   | Competitiveness |   | Uncertainty |   | Degree of applicability (DA) | Rank (DA) | Degree of context specificity (DCS) |      |     |     |
|     |                           | 0                                        | 1            | 0                                   | 1 | 0                  | 1 | 0                      | 1 | 0                   | 1 | 0          | 1 | 0               | 1 | 0           | 1 | 0     | 1 | 0        | 1 | 0                     | 1 | 0       | 1 | 0                              | 1 | 0               | 1 | 0           | 1 |                              |           |                                     |      |     |     |
| 97  | van der Aa et al. 2017*   | Design                                   | Exploitation | 1                                   | 1 | 1                  | 1 | 1                      | 1 | 1                   | 1 | 1          | 1 | 1               | 1 | 1           | 1 | 1     | 0 | 1        | 1 | 1                     | 1 | 1       | 1 | 1                              | 1 | 1               | 1 | 1           | 1 | 1                            | 1         | 1                                   | 100% | 1   | 6%  |
| 38  | Heinrich and Schön 2015*  | Design                                   | Exploitation | 1                                   | 1 | 1                  | 1 | 1                      | 1 | 1                   | 0 | 1          | 0 | 1               | 1 | 1           | 1 | 1     | 1 | 1        | 1 | 1                     | 1 | 1       | 0 | 1                              | 1 | 1               | 1 | 1           | 1 | 1                            | 1         | 1                                   | 96%  | 2   | 19% |
| 9   | Bergener et al. 2015*     | Design                                   | Exploitation | 1                                   | 0 | 1                  | 1 | 0                      | 1 | 0                   | 1 | 0          | 1 | 1               | 1 | 1           | 1 | 1     | 1 | 1        | 1 | 1                     | 1 | 0       | 1 | 1                              | 1 | 1               | 1 | 1           | 1 | 0                            | 73%       | 3                                   | 24%  |     |     |
| 102 | Zhu et al. 2014*          | Design                                   | Exploitation | 1                                   | 1 | 1                  | 1 | 0                      | 1 | 0                   | 1 | 0          | 1 | 1               | 1 | 1           | 1 | 1     | 0 | 1        | 1 | 1                     | 1 | 1       | 0 | 0                              | 1 | 1               | 1 | 1           | 0 | 66%                          | 4         | 27%                                 |      |     |     |
| 3   | Anastasiu et al. 2016     | Design                                   | Exploitation | 1                                   | 0 | 0                  | 1 | 0                      | 0 | 0                   | 0 | 0          | 0 | 0               | 1 | 0           | 1 | 0     | 0 | 0        | 0 | 0                     | 0 | 0       | 1 | 0                              | 0 | 0               | 0 | 0           | 0 | 1                            | 63%       | 5,5                                 | 21%  |     |     |
| 50  | La Rosa et al. 2015*      | Design                                   | Exploitation | 1                                   | 0 | 1                  | 1 | 0                      | 1 | 0                   | 1 | 0          | 1 | 1               | 1 | 1           | 1 | 0     | 1 | 1        | 1 | 1                     | 0 | 0       | 1 | 1                              | 0 | 0               | 1 | 1           | 1 | 1                            | 0         | 63%                                 | 5,5  | 35% |     |
| 84  | Ruiz et al. 2015          | Design                                   | Exploitation | 0                                   | 0 | 0                  | 0 | 0                      | 0 | 0                   | 0 | 0          | 0 | 0               | 0 | 0           | 0 | 0     | 0 | 0        | 0 | 0                     | 0 | 0       | 0 | 0                              | 0 | 0               | 0 | 1           | 0 | 1                            | 0         | 1                                   | 55%  | 7   | 9%  |
| 45  | Khelif et al. 2017*       | Design                                   | Exploitation | 1                                   | 0 | 1                  | 1 | 0                      | 1 | 1                   | 1 | 0          | 1 | 0               | 1 | 0           | 1 | 0     | 1 | 0        | 1 | 1                     | 1 | 0       | 1 | 0                              | 1 | 1               | 1 | 1           | 1 | 0                            | 1         | 0                                   | 54%  | 8   |     |
| 39  | Heinrich and Schön 2016   | Design                                   | Exploitation | 0                                   | 0 | 0                  | 0 | 0                      | 0 | 1                   | 0 | 1          | 0 | 1               | 0 | 0           | 0 | 0     | 1 | 0        | 0 | 0                     | 0 | 0       | 0 | 0                              | 0 | 0               | 0 | 0           | 1 | 0                            | 1         | 47%                                 | 9,5  | 15% |     |
| 42  | Janiesch and Diebold 2016 | Design                                   | Exploitation | 0                                   | 0 | 0                  | 0 | 0                      | 0 | 0                   | 1 | 0          | 1 | 0               | 1 | 0           | 1 | 0     | 0 | 0        | 0 | 0                     | 0 | 0       | 0 | 0                              | 0 | 0               | 0 | 0           | 1 | 0                            | 1         | 47%                                 | 9,5  | 16% |     |

\* BPM method assessed by original BPM method engineer

**Figure A-12:** Results of applying the Selection Process to the process (P2) establish product group advisory of SERVICE (risk-averse mode)

|     |                         | Context dimension (see Activity S3)   |              |   |                                  |   |                    |                 |                     |            |                  |             |                        |          |      |         |           |                  |             |   |     |   |                       |   |     |   | Indicator (see Activity S4) |   |   |     |   |                              |   |           |                                     |   |     |     |     |     |     |
|-----|-------------------------|---------------------------------------|--------------|---|----------------------------------|---|--------------------|-----------------|---------------------|------------|------------------|-------------|------------------------|----------|------|---------|-----------|------------------|-------------|---|-----|---|-----------------------|---|-----|---|-----------------------------|---|---|-----|---|------------------------------|---|-----------|-------------------------------------|---|-----|-----|-----|-----|-----|
|     |                         | 0,6                                   |              |   |                                  |   |                    |                 |                     |            |                  |             | 0,2                    |          |      |         |           |                  |             |   |     |   | 0,2                   |   |     |   |                             |   |   |     |   |                              |   |           |                                     |   |     |     |     |     |     |
|     |                         | Process dimension                     |              |   |                                  |   |                    |                 |                     |            |                  |             | Organization dimension |          |      |         |           |                  |             |   |     |   | Environment dimension |   |     |   |                             |   |   |     |   |                              |   |           |                                     |   |     |     |     |     |     |
|     |                         | 0,3                                   |              |   | 0,1                              |   | 0,3                |                 | 0,1                 |            | 0,1              |             | 0,1                    |          | 0,5  |         | 0         |                  | 0           |   | 0,2 |   | 0,3                   |   | 0,1 |   |                             |   |   | 0,9 |   |                              |   |           |                                     |   |     |     |     |     |     |
| ID  | Author                  | Lifecycle dimension (see Activity S1) |              |   | Goal dimension (see Activity S2) |   | Value contribution | Repetitive-ness | Knowledge-intensity | Creativity | Inter-dependence | Variability | Scope                  | Industry | Size | Culture | Resources | Competitive-ness | Uncertainty |   |     |   |                       |   |     |   |                             |   |   |     |   | Degree of applicability (DA) |   | Rank (DA) | Degree of context specificity (DCS) |   |     |     |     |     |     |
|     |                         |                                       |              |   |                                  |   |                    |                 |                     |            |                  |             |                        |          |      |         |           |                  |             |   |     |   |                       |   |     |   |                             |   |   |     |   |                              |   |           |                                     |   |     |     |     |     |     |
| 47  | Johannsen and Fill 2014 | Implementation                        | Exploitation | 0 | 0                                | 0 | 0                  | 0               | 0                   | 1          | 0                | 0           | 1                      | 0        | 0    | 0       | 1         | 0                | 0           | 0 | 0   | 0 | 0                     | 1 | 0   | 0 | 0                           | 0 | 0 | 0   | 0 | 1                            | 0 | 0         | 0                                   | 0 | 32% | 1   | 27% |     |     |
| 33  | Fdhila et al. 2015      | Implementation                        | Exploitation | 1 | 0                                | 1 | 0                  | 0               | 0                   | 0          | 0                | 0           | 0                      | 0        | 0    | 0       | 0         | 0                | 0           | 1 | 0   | 0 | 0                     | 0 | 0   | 0 | 0                           | 1 | 0 | 0   | 0 | 0                            | 0 | 0         | 0                                   | 0 | 0   | 28% | 2   | 15% |     |
| 71  | Maamar et al. 2016      | Implementation                        | Exploitation | 0 | 0                                | 0 | 0                  | 0               | 0                   | 1          | 0                | 0           | 0                      | 0        | 0    | 0       | 1         | 0                | 0           | 0 | 0   | 0 | 0                     | 0 | 1   | 0 | 0                           | 0 | 0 | 0   | 0 | 0                            | 0 | 0         | 1                                   | 0 | 0   | 0   | 22% | 3,5 | 12% |
| 90  | Rangha et al. 2016      | Implementation                        | Exploitation | 0 | 0                                | 0 | 0                  | 1               | 0                   | 1          | 0                | 1           | 0                      | 0        | 0    | 1       | 1         | 0                | 0           | 0 | 0   | 0 | 0                     | 0 | 0   | 0 | 1                           | 0 | 0 | 1   | 0 | 0                            | 0 | 0         | 0                                   | 0 | 0   | 22% | 3,5 | 23% |     |
| 107 | Trkman et al. 2015      | Implementation                        | Exploitation | 1 | 0                                | 0 | 0                  | 0               | 0                   | 0          | 0                | 0           | 0                      | 0        | 0    | 0       | 1         | 0                | 0           | 1 | 0   | 0 | 0                     | 0 | 0   | 1 | 0                           | 0 | 0 | 0   | 0 | 0                            | 1 | 0         | 0                                   | 0 | 14% | 5   | 23% |     |     |
| 59  | Lanz and Reichert 2014  | Implementation                        | Exploitation | 1 | 0                                | 0 | 0                  | 0               | 0                   | 0          | 0                | 0           | 0                      | 0        | 0    | 1       | 0         | 0                | 0           | 0 | 0   | 0 | 0                     | 0 | 0   | 0 | 0                           | 0 | 0 | 0   | 0 | 0                            | 0 | 0         | 0                                   | 0 | 0   | 0   | 6%  | 6   | 15% |

\* BPM method assessed by original BPM method engineer

**Figure A-13:** Results of applying the Selection Process to the process (P3) export control classification of SERVICE (risk-averse mode)

|     |                           |                                          | Context dimension<br>(see Activity S3) |                    |     |                |     |                     |                        |            |     |                  |     |             |     |       |     |          |     |      |                       |         |     |           |     |                 |     |             | Indicator<br>(see Activity S4) |                              |           |                                     |      |     |      |     |     |   |     |
|-----|---------------------------|------------------------------------------|----------------------------------------|--------------------|-----|----------------|-----|---------------------|------------------------|------------|-----|------------------|-----|-------------|-----|-------|-----|----------|-----|------|-----------------------|---------|-----|-----------|-----|-----------------|-----|-------------|--------------------------------|------------------------------|-----------|-------------------------------------|------|-----|------|-----|-----|---|-----|
|     |                           |                                          | 0,8                                    |                    |     |                |     |                     |                        |            |     |                  |     |             |     | 0,2   |     |          |     |      |                       |         |     |           |     | 0,0             |     |             |                                |                              |           |                                     |      |     |      |     |     |   |     |
|     |                           |                                          | Process dimension                      |                    |     |                |     |                     | Organization dimension |            |     |                  |     |             |     |       |     |          |     |      | Environment dimension |         |     |           |     |                 |     |             |                                |                              |           |                                     |      |     |      |     |     |   |     |
|     |                           |                                          | 0,2                                    |                    | 0,2 |                | 0,2 |                     | 0,2                    |            | 0,1 |                  | 0,1 |             | 0,3 |       | 0,1 |          | 0,1 |      | 0,1                   |         | 0,4 |           | 0,7 |                 | 0,3 |             |                                |                              |           |                                     |      |     |      |     |     |   |     |
| ID  | Author                    | Lifecycle dimension<br>(see Activity S1) | Goal dimension<br>(see Activity S2)    | Value contribution |     | Repetitiveness |     | Knowledge intensity |                        | Creativity |     | Inter-dependence |     | Variability |     | Scope |     | Industry |     | Size |                       | Culture |     | Resources |     | Competitiveness |     | Uncertainty |                                | Degree of applicability (DA) | Rank (DA) | Degree of context specificity (DCS) |      |     |      |     |     |   |     |
|     |                           |                                          | 0                                      | 0                  | 1   | 1              | 0   | 0                   | 1                      | 1          | 0   | 1                | 0   | 1           | 0   | 1     | 0   | 0        | 0   | 1    | 0                     | 1       | 0   | 1         | 0   | 1               | 0   | 1           | 0                              | 1                            | 0         | 1                                   | 0    |     |      |     |     |   |     |
| 53  | Lehnert et al. 2014*      | Project management                       | Exploitation                           | 1                  | 0   | 1              | 1   | 1                   | 1                      | 1          | 1   | 1                | 0   | 1           | 1   | 1     | 1   | 0        | 1   | 1    | 1                     | 1       | 1   | 1         | 0   | 1               | 1   | 1           | 1                              | 1                            | 1         | 1                                   | 100% | 1,5 | 21%  |     |     |   |     |
| 103 | CAMAS Method*             | Project management                       | Exploitation                           | 1                  | 1   | 1              | 1   | 1                   | 1                      | 1          | 1   | 1                | 1   | 1           | 1   | 1     | 1   | 1        | 1   | 1    | 1                     | 1       | 1   | 1         | 1   | 1               | 1   | 1           | 1                              | 1                            | 1         | 1                                   | 1    | 1   | 100% | 1,5 | 0%  |   |     |
| 54  | Lehnert et al. 2018*      | Project management                       | Exploitation                           | 1                  | 0   | 1              | 1   | 0                   | 1                      | 1          | 1   | 1                | 1   | 1           | 1   | 1     | 1   | 0        | 1   | 1    | 1                     | 1       | 0   | 0         | 1   | 1               | 0   | 1           | 1                              | 1                            | 1         | 1                                   | 1    | 1   | 98%  | 3   | 23% |   |     |
| 65  | Manderscheid et al. 2015* | Project management                       | Exploitation                           | 1                  | 0   | 0              | 1   | 1                   | 1                      | 1          | 1   | 1                | 1   | 1           | 1   | 1     | 1   | 0        | 1   | 1    | 1                     | 1       | 1   | 1         | 0   | 1               | 1   | 1           | 1                              | 1                            | 1         | 1                                   | 1    | 1   | 84%  | 4   | 23% |   |     |
| 58  | Linhart et al. 2015a*     | Project management                       | Exploitation                           | 1                  | 0   | 0              | 1   | 0                   | 1                      | 1          | 1   | 1                | 1   | 1           | 1   | 1     | 0   | 1        | 1   | 1    | 0                     | 0       | 1   | 0         | 0   | 1               | 0   | 1           | 1                              | 1                            | 1         | 1                                   | 1    | 1   | 82%  | 5   | 32% |   |     |
| 7   | Bala et al. 2015*         | Project management                       | Exploitation                           | 1                  | 0   | 0              | 0   | 1                   | 1                      | 0          | 1   | 0                | 0   | 1           | 0   | 1     | 0   | 0        | 0   | 0    | 1                     | 1       | 1   | 1         | 0   | 0               | 0   | 1           | 1                              | 1                            | 1         | 1                                   | 1    | 1   | 50%  | 6   | 43% |   |     |
| 82  | Rocha et al. 2015         | Project management                       | Exploitation                           | 0                  | 1   | 0              | 1   | 0                   | 0                      | 0          | 0   | 0                | 0   | 1           | 0   | 0     | 1   | 0        | 0   | 0    | 0                     | 0       | 0   | 0         | 0   | 0               | 0   | 0           | 0                              | 0                            | 0         | 1                                   | 0    | 1   | 0    | 0   | 38% | 7 | 32% |

\* BPM method assessed by original BPM method engineer

Figure A-14: Results of applying the Selection Process to the process (P5) control performance indicators of PRODUCT (risk-averse mode)

|    |                          |                                          | Context dimension<br>(see Activity S3) |                    |                    |                 |                 |                |                         |                          |                |                 |                     |                      |                        |                  |                                |                                |                  |                  |                            |          |                             |                       |                                  |                               | Indicator<br>(see Activity S4) |                               |                             |                              |                               |                                |     |                              |           |                                     |     |     |
|----|--------------------------|------------------------------------------|----------------------------------------|--------------------|--------------------|-----------------|-----------------|----------------|-------------------------|--------------------------|----------------|-----------------|---------------------|----------------------|------------------------|------------------|--------------------------------|--------------------------------|------------------|------------------|----------------------------|----------|-----------------------------|-----------------------|----------------------------------|-------------------------------|--------------------------------|-------------------------------|-----------------------------|------------------------------|-------------------------------|--------------------------------|-----|------------------------------|-----------|-------------------------------------|-----|-----|
|    |                          |                                          | 0,6                                    |                    |                    |                 |                 |                |                         |                          |                |                 |                     |                      | 0,3                    |                  |                                |                                |                  |                  |                            |          |                             | 0,1                   |                                  |                               |                                |                               |                             |                              |                               |                                |     |                              |           |                                     |     |     |
|    |                          |                                          | Process dimension                      |                    |                    |                 |                 |                |                         |                          |                |                 |                     |                      | Organization dimension |                  |                                |                                |                  |                  |                            |          |                             | Environment dimension |                                  |                               |                                |                               |                             |                              |                               |                                |     |                              |           |                                     |     |     |
|    |                          |                                          | 0,25                                   |                    |                    | 0,25            |                 | 0              |                         | 0                        |                | 0,25            |                     | 0,25                 |                        | 0,25             |                                |                                | 0,25             |                  |                            | 0        |                             | 0,25                  |                                  | 0,25                          |                                | 0,6                           |                             | 0,4                          |                               |                                |     |                              |           |                                     |     |     |
| ID | Author                   | Lifecycle dimension<br>(see Activity S1) | Goal dimension<br>(see Activity S2)    | Value contribution |                    |                 | Repetitive-ness |                | Knowledge-intensity     |                          | Creativity     |                 | Inter-dependence    |                      | Variability            |                  | Scope                          |                                |                  | Industry         |                            |          | Size                        |                       |                                  | Culture                       |                                | Resources                     |                             | Competitive-ness             |                               | Uncertainty                    |     | Degree of applicability (DA) | Rank (DA) | Degree of context specificity (DCS) |     |     |
|    |                          |                                          |                                        | Core process       | Management process | Support process | Repetitive      | Non-repetitive | Low knowledge-intensity | High knowledge-intensity | Low creativity | High creativity | Low interdependence | High interdependence | Low variability        | High variability | Intra-organizational processes | Inter-organizational processes | Product industry | Service industry | Product & service industry | Start-up | Small and medium enterprise | Large organization    | Culture highly supportive of BPM | Culture non-supportive of BPM | Low organizational resources   | High organizational resources | Low competitive environment | High competitive environment | Low environmental uncertainty | High environmental uncertainty |     |                              |           |                                     |     |     |
| 9  | Bergener et al. 2015*    | Improvement and innovation               | Exploitation                           | 1                  | 0                  | 1               | 1               | 0              | 1                       | 0                        | 1              | 0               | 1                   | 1                    | 1                      | 1                | 1                              | 1                              | 1                | 1                | 1                          | 1        | 0                           | 1                     | 1                                | 1                             | 1                              | 1                             | 1                           | 1                            | 1                             | 0                              | 93% | 2                            | 24%       |                                     |     |     |
| 15 | Breuker et al. 2016*     | Improvement and innovation               | Exploitation                           | 1                  | 0                  | 1               | 1               | 0              | 1                       | 0                        | 1              | 0               | 1                   | 1                    | 1                      | 1                | 1                              | 1                              | 1                | 1                | 1                          | 1        | 0                           | 1                     | 1                                | 1                             | 1                              | 1                             | 1                           | 1                            | 1                             | 1                              | 0   | 93%                          | 2         | 24%                                 |     |     |
| 38 | Heinrich and Schön 2015* | Improvement and innovation               | Exploitation                           | 1                  | 1                  | 1               | 1               | 1              | 1                       | 0                        | 1              | 0               | 1                   | 1                    | 1                      | 1                | 1                              | 1                              | 1                | 1                | 1                          | 1        | 1                           | 1                     | 1                                | 0                             | 1                              | 1                             | 1                           | 1                            | 1                             | 1                              | 1   | 1                            | 1         | 93%                                 | 2   | 19% |
| 61 | Low et al. 2017*         | Improvement and innovation               | Exploitation                           | 1                  | 1                  | 1               | 1               | 0              | 1                       | 1                        | 1              | 1               | 1                   | 0                    | 1                      | 1                | 1                              | 1                              | 1                | 1                | 1                          | 1        | 1                           | 1                     | 1                                | 1                             | 1                              | 1                             | 1                           | 1                            | 1                             | 1                              | 1   | 1                            | 0         | 85%                                 | 4   | 3%  |
| 41 | Imgrund et al. 2017*     | Improvement and innovation               | Exploitation                           | 0                  | 1                  | 1               | 1               | 0              | 1                       | 0                        | 1              | 1               | 1                   | 1                    | 0                      | 1                | 1                              | 1                              | 0                | 1                | 1                          | 1        | 1                           | 0                     | 1                                | 1                             | 1                              | 1                             | 1                           | 1                            | 1                             | 1                              | 1   | 1                            | 1         | 78%                                 | 5,5 | 21% |
| 45 | Khlif et al. 2017*       | Improvement and innovation               | Exploitation                           | 1                  | 0                  | 1               | 1               | 0              | 1                       | 1                        | 1              | 0               | 1                   | 0                    | 1                      | 0                | 1                              | 0                              | 1                | 1                | 1                          | 1        | 0                           | 1                     | 0                                | 1                             | 1                              | 1                             | 1                           | 1                            | 1                             | 1                              | 0   | 1                            | 0         | 78%                                 | 5,5 | 35% |
| 24 | Denner et al. 2018*      | Improvement and innovation               | Exploitation                           | 1                  | 0                  | 1               | 1               | 1              | 1                       | 1                        | 1              | 1               | 0                   | 1                    | 0                      | 1                | 0                              | 1                              | 0                | 1                | 1                          | 1        | 0                           | 1                     | 1                                | 1                             | 1                              | 0                             | 0                           | 1                            | 1                             | 1                              | 1   | 1                            | 70%       | 7                                   | 28% |     |
| 77 | Polpinij et al. 2015     | Improvement and innovation               | Exploitation                           | 1                  | 0                  | 0               | 1               | 0              | 0                       | 0                        | 0              | 0               | 0                   | 0                    | 1                      | 1                | 0                              | 1                              | 0                | 0                | 0                          | 0        | 0                           | 0                     | 0                                | 0                             | 1                              | 1                             | 0                           | 0                            | 1                             | 0                              | 1   | 0                            | 0         | 53%                                 | 8   | 35% |

\* BPM method assessed by original BPM method engineer

**Figure A-15:** Results of applying the Selection Process to the process (P6) purchase row materials of PRODUCT (risk-averse mode)

## References

- Antunes AS, Rupino da Cunha P, Barata J (2014) MUVE IT: reduce the friction in business processes. *Bus Process Manag J* 20:571–597
- Cohen J (1960) A coefficient of agreement for nominal scales. *Educ Psychol Meas* 20:37–46
- Dumas M, La Rosa M, Mendling J, Reijers HA (2018) *Fundamentals of business process management*, 2nd edn. Springer, Heidelberg
- Kohlborn T, Mueller O, Poeppelbuss J, Röglinger M (2014) Interview with Michael Rosemann on ambidextrous business process management. *Bus Process Manag J* 20:634–638
- Lanz A, Reichert M, Weber B (2016) Process time patterns: a formal foundation. *Inf Syst* 57:38–68
- Moore GC, Benbasat I (1991) Development of an instrument to measure the perceptions of adopting an information technology innovation. *Inf Syst Res* 2:192–222
- Nahm AY, Rao SS, Solis-Galvan LE, Ragu-Nathan TS (2002) The Q-Sort method: assessing reliability and construct validity of questionnaire items at a pre-testing stage. *J Mod Appl Stat Meth* 1:114–125
- Turetken O, Rompen T, Vanderfeesten I, Dikici A, van Moll J (2016) The effect of modularity representation and presentation medium on the understandability of business process models in BPMN. In: La Rosa M, Loos P, Pastor Ó (eds) *Proceedings of the 14th International Conference on Business Process Management*, pp 289–307
- Vanwersch RJB, Shahzad K, Vanderfeesten I, Vanhaecht K, Grefen P, Pintelon L, Mendling J, van Merode GG, Reijers HA (2016) A critical evaluation and framework of business process improvement methods. *Bus Inf Syst Eng* 58:43–53
- Verbrugge B (2018) Best practice, model, framework, method, guidance, standard: towards a consistent use of terminology. <https://www.vanharen.net/blog/general/best-practice-model-framework-method-guidance-standard-towards-consistent-use-terminology>. Accessed 15 June 2019
- vom Brocke J, Mendling J (2018) Framework for business process management: a taxonomy for business process management cases. In: vom Brocke J, Mendling J (eds) *Business Process Management Cases: Digital Innovation and Business Transformation in Practice*. Springer, Cham, pp 1–26
- vom Brocke J, Simons A, Niehaves B, Riemer, Kai, Plattfaut R, Cleven A (2009) Reconstructing the giant: on the importance of rigour in documenting the literature search process. In: Newell S, Whitley EA, Pouloudi N, Wareham J, Mathiassen L (eds) *Proceedings of the 17th European Conference on Information Systems*, pp 2206–2217
- vom Brocke J, Zelt S, Schmiedel T (2016) On the role of context in business process management. *Int J Inf Manag* 36:486–495
- Webster J, Watson RT (2002) Analyzing the past to prepare for the future: writing a literature review. *MIS Q* 26:xiii–xxiii
