# Supplementary material for: Context-Aware Business Process Management
Source: Springer Nature journal article supplement (doi:10.1007/s12599-021-00685-0), 2021-03-02
Supplement: MOESM2 [file 18922520]

## Sheet: Assessment Process
	For details on the application of the Excel prototype see Section 4.3
					Context dimension (see Activity A4)
					Process dimension													Organization dimension												Environment dimension					Indicator		Inter-coder reliability
					Value contribution			Repetitive-ness		Knowledge intensity		Creativity		Inter-dependence		Variability		Scope		Industry			Size			Culture		Resources		Competitive-ness		Uncertainty
					Core process	Management process	Support process	Repetitive	Non-repetitive	Low knowledge-intensity	High knowledge-intensity	Low creativity	High creativity	Low interdependence	High interdependence	Low variability	High variablity	Intra-organizational processes	Inter-organizational processes	Product industry	Service industry	Product & service industry	Start-up	Small and medium enterprise	Large organization	Culture highly supportive of BPM	Culture non-supportive of BPM	Low organizational resources	High organizational resources	Low competetive environment	High competetive environment	Low environmental uncertainty	High environmental uncertainty		Degree of context specificity (DCS)		Hit Ratio	Cohen`s Kappa
	ID	Author	Lifecycle dimension (see Activity A2)	Goal dimension (see Activity A3)
	1	BPM Method 1	Design	Exploitation	a	–	–	a	–	-	–	–	–	–	a	–	a	a	–	–	–	–	–	–	–	a	–	–	–	–	–	–	a		0.205128
	2	BPM Method 2	Design	Exploitation	–	–	–	a	–	–	–	–	–	–	–	a	na	–	–	–	–	–	–	–	–	–	–	–	–	–	–	–	–		0.0954907
	…	…	Design	Exploitation
	n	BPM Method n	Design	Exploitation
			Implementation	Exploitation
			Implementation	Exploitation
			Implementation	Exploitation
			Monitoring	Exploitation
			Monitoring	Exploitation
			Monitoring	Exploitation
			Improvement and innovation	Exploitation
			Improvement and innovation	Exploitation
			Improvement and innovation	Exploitation
			Project management	Exploitation
			Project management	Exploitation
			Project management	Exploitation
			Design	Exploration
			Design	Exploration
			Design	Exploration
			Implementation	Exploration
			Implementation	Exploration
			Implementation	Exploration
			Improvement and innovation	Exploration
			Improvement and innovation	Exploration
			Improvement and innovation	Exploration
			Project management	Exploration
			Project management	Exploration
			Project management	Exploration
					a	applicable to a specific context characteristic									na	not applicable to a specific context characteristic										–	applicability is not assessable

## Sheet: Selection Method_risk-averse
	For details on the application of the Excel prototype see Section 4.4
											Context dimension (see Activity S3)
											0.4													0.3												0.3
											Process dimension													Organization dimension												Environment dimension				Process dimension
					Further evaluation critria						0.2			0.2		0.15		0.15		0.15		0.15		0.2		0.2			0.2			0.2		0.2		0.5		0.5
					Criteria "ease-of-use"		Criteria "training effort"		Overall results		Value contribution			Repetitive-ness		Knowledge intensity		Creativity		Inter-dependence		Variability		Scope		Industry			Size			Culture		Resources		Competitive-ness		Uncertainty		Value contribution			Repetitive-ness		Knowledge intensity		Creativity		Inter-dependence
					Assessment "ease-of-use" (Scale: 3 - easy, 2 - medium, 1 - difficult)	Rank "ease-of-use"	Assessment "training effort" (Scale: 3 - high, 2 - medium, 1 - low)	Rank "training effort"	Sum of all ranks (context awareness, ease-of-use, training effort)	Overall rank (context awareness, ease-of-use, training effort)	Core process	Management process	Support process	Repetitive	Non-repetitive	Low knowledge-intensity	High knowledge-intensity	Low creativity	High creativity	Low interdependence	High interdependence	Low variability	High variablity	Intra-organizational processes	Inter-organizational processes	Product industry	Service industry	Product & service industry	Start-up	Small and medium enterprise	Large organization	Culture highly supportive of BPM	Culture non-supportive of BPM	Low organizational resources	High organizational resources	Low competetive environment	High competetive environment	Low environmental uncertainty	High environmental uncertainty	Core process	Management process	Support process	Repetitive	Non-repetitive	Low knowledge-intensity	High knowledge-intensity	Low creativity	High creativity	Low interdependence
	ID	Author	Lifecycle dimension (see Activity S1)	Goal dimension (see Activity S2)							1	0	0	1	0	1	0	1	0	1	0	1	0	1	0	0	0	1	0	1	0	0	1	0	1	1	0	1	0
	3	Anastassiu et al. 2016	Design	Exploitation		#N/A		#N/A	#REF!	#REF!	1	0	0	1	0	0	0	0	0	0	1	0	1	1	0	0	0	0	0	0	0	1	0	0	0	0	0	0	1	0.08	0	0	0.08	0	0	0	0	0	0
	5	Appel et al. 2014	Design	Exploitation		#N/A		#N/A	#REF!	#REF!	0	0	0	1	0	0	0	0	0	0	0	1	0	0	0	0	0	0	0	0	0	0	0	0	0	0	0	0	0	0	0	0	0.08	0	0	0	0	0	0
	6	Atkinson et al. 2015	Design	Exploitation		#N/A		#N/A	#REF!	#REF!	0	0	0	0	0	0	0	0	0	0	0	0	0	0	0	0	0	0	0	0	0	1	0	0	0	0	0	0	0	0	0	0	0	0	0	0	0	0	0
	9	Bergener et al. 2015*	Design	Exploitation		#N/A		#N/A	#REF!	#REF!	1	0	1	1	0	1	0	1	0	1	1	1	1	1	1	1	1	1	0	1	1	1	0	1	1	1	1	1	0	0.08	0	0	0.08	0	0.06	0	0.06	0	0.06
	14	Boubeta-Puig et al. 2017	Design	Exploitation		#N/A		#N/A	#REF!	#REF!	0	0	0	0	0	0	1	0	1	0	1	0	0	0	0	0	0	0	0	0	0	0	0	0	0	0	0	0	0	0	0	0	0	0	0	0	0	0	0
	17	Cabanillas et al. 2015	Design	Exploitation		#N/A		#N/A	#REF!	#REF!	0	0	0	0	0	0	1	0	1	0	0	0	0	0	0	0	0	0	0	0	0	0	0	0	0	0	0	0	0	0	0	0	0	0	0	0	0	0	0
	20	de Leoni et al. 2015	Design	Exploitation		#N/A		#N/A	#REF!	#REF!	1	0	0	0	0	0	0	0	0	0	0	0	0	0	0	0	0	0	0	0	0	0	0	0	0	0	0	0	0	0.08	0	0	0	0	0	0	0	0	0
	22	Debois et al. 2014	Design	Exploitation		#N/A		#N/A	#REF!	#REF!	0	0	0	1	0	1	0	1	0	1	0	1	0	0	0	0	0	0	0	0	0	0	0	0	0	0	0	0	0	0	0	0	0.08	0	0.06	0	0.06	0	0.06
	23	del-Río-Ortega et al. 2017	Design	Exploitation		#N/A		#N/A	#REF!	#REF!	0	0	0	1	0	0	0	0	0	0	0	0	0	0	0	0	1	1	0	0	0	1	0	0	0	0	0	0	0	0	0	0	0.08	0	0	0	0	0	0
	25	Derguech et al. 2017	Design	Exploitation		#N/A		#N/A	#REF!	#REF!	0	0	0	1	0	0	0	0	0	0	0	1	0	0	0	0	0	0	0	0	0	0	0	0	0	0	0	0	0	0	0	0	0.08	0	0	0	0	0	0
	28	do Prado Leite et al. 2016	Design	Exploitation		#N/A		#N/A	#REF!	#REF!	0	0	0	1	0	0	1	0	1	0	1	0	0	1	0	0	0	0	0	0	0	0	0	0	0	0	0	0	0	0	0	0	0.08	0	0	0	0	0	0
	29	Fahland and Völzer 2018	Design	Exploitation		#N/A		#N/A	#REF!	#REF!	0	0	0	0	0	0	0	0	0	0	1	0	1	0	0	0	0	0	0	0	0	1	0	0	0	0	0	0	0	0	0	0	0	0	0	0	0	0	0
	31	Fengel 2014	Design	Exploitation		#N/A		#N/A	#REF!	#REF!	0	0	0	0	0	0	0	0	0	0	0	0	0	1	0	0	0	0	0	0	1	1	0	0	0	0	0	0	0	0	0	0	0	0	0	0	0	0	0
	33	Gailly et al. 2017	Design	Exploitation		#N/A		#N/A	#REF!	#REF!	0	0	0	0	0	0	0	0	0	0	0	0	0	0	0	0	0	0	0	0	0	1	0	0	0	0	0	0	0	0	0	0	0	0	0	0	0	0	0
	37	Harman et al. 2016	Design	Exploitation		#N/A		#N/A	#REF!	#REF!	0	0	0	0	0	0	0	0	0	0	0	0	0	0	0	0	0	0	0	0	0	0	1	0	0	0	0	0	0	0	0	0	0	0	0	0	0	0	0
	38	Heinrich and Schön 2015*	Design	Exploitation		#N/A		#N/A	#REF!	#REF!	1	1	1	1	1	1	0	1	0	1	1	1	1	1	1	1	1	1	1	1	1	1	0	1	1	1	1	1	1	0.08	0	0	0.08	0	0.06	0	0.06	0	0.06
	39	Heinrich and Schön 2016	Design	Exploitation		#N/A		#N/A	#REF!	#REF!	0	0	0	0	0	0	1	0	1	0	1	0	0	0	1	0	0	0	0	0	0	0	0	0	0	0	1	0	1	0	0	0	0	0	0	0	0	0	0
	40	Hotie and Gordijn 2017	Design	Exploitation		#N/A		#N/A	#REF!	#REF!	1	0	0	0	0	0	0	0	0	0	0	0	0	0	0	0	1	1	0	0	0	0	1	0	0	0	0	0	0	0.08	0	0	0	0	0	0	0	0	0
	41	Imgrund et al. 2017*	Design	Exploitation		#N/A		#N/A	#REF!	#REF!	0	0	0	0	0	0	0	0	0	0	0	0	0	0	0	0	0	0	0	0	0	0	0	1	0	0	0	0	0	0	0	0	0	0	0	0	0	0	0
	42	Janiesch and Diebold 2016	Design	Exploitation		#N/A		#N/A	#REF!	#REF!	0	0	0	0	0	0	1	0	1	0	1	0	1	0	0	0	0	0	0	0	0	0	0	0	0	0	1	0	1	0	0	0	0	0	0	0	0	0	0
	44	Jouck and Depaire 2018	Design	Exploitation		#N/A		#N/A	#REF!	#REF!	0	0	0	0	0	0	0	0	0	0	0	0	0	0	0	0	0	0	0	0	0	0	0	0	0	0	0	0	0	0	0	0	0	0	0	0	0	0	0
	45	Khlif et al. 2017*	Design	Exploitation							1	0	1	1	0	1	1	1	0	1	0	1	0	1	0	1	1	1	0	1	0	1	1	1	1	1	0	1	0	0.08	0	0	0.08	0	0.06	0	0.06	0	0.06
	49	Krumeich et al. 2014	Design	Exploitation		#N/A		#N/A	#REF!	#REF!	1	1	0	0	0	0	1	0	1	0	0	0	0	0	0	0	0	0	0	0	1	1	0	0	0	0	0	0	0	0.08	0	0	0	0	0	0	0	0	0
	50	La Rosa et al. 2015*	Design	Exploitation		#N/A		#N/A	#REF!	#REF!	1	0	1	1	0	1	0	1	0	1	1	1	1	1	0	1	1	1	0	0	1	1	0	0	1	1	1	1	0	0.08	0	0	0.08	0	0.06	0	0.06	0	0.06
	55	Leopold et al. 2014	Design	Exploitation		#N/A		#N/A	#REF!	#REF!	0	0	0	0	0	0	0	0	0	0	0	0	0	0	1	0	0	0	0	0	1	0	0	0	0	0	0	0	0	0	0	0	0	0	0	0	0	0	0
	56	Liesaputra et al. 2015	Design	Exploitation		#N/A		#N/A	#REF!	#REF!	0	0	0	0	1	0	0	0	0	0	0	1	0	0	0	0	0	0	0	0	0	1	0	0	0	0	0	0	0	0	0	0	0	0	0	0	0	0	0
	60	Liptchinsky et al. 2014	Design	Exploitation		#N/A		#N/A	#REF!	#REF!	0	0	0	0	0	0	1	0	0	0	0	0	0	0	0	0	0	0	0	0	0	0	0	0	0	0	0	0	0	0	0	0	0	0	0	0	0	0	0
	64	Maggi et al. 2014	Design	Exploitation		#N/A		#N/A	#REF!	#REF!	0	0	0	0	0	0	0	0	0	0	0	0	1	0	0	0	0	0	0	0	0	0	0	0	0	0	0	0	0	0	0	0	0	0	0	0	0	0	0
	72	Mrasek et al. 2015	Design	Exploitation		#N/A		#N/A	#REF!	#REF!	1	0	0	0	0	0	0	0	0	0	0	0	0	0	0	0	0	0	0	0	0	0	0	0	0	0	0	0	0	0.08	0	0	0	0	0	0	0	0	0
	76	Pittl et al. 2017	Design	Exploitation		#N/A		#N/A	#REF!	#REF!	0	0	0	0	0	0	0	0	0	0	0	0	0	0	0	0	0	0	0	0	0	0	0	0	0	0	1	0	1	0	0	0	0	0	0	0	0	0	0
	78	Ponce-de-León et al. 2015	Design	Exploitation		#N/A		#N/A	#REF!	#REF!	0	0	0	0	0	0	0	0	0	0	0	0	1	0	0	0	0	0	0	0	0	0	0	0	0	0	0	0	0	0	0	0	0	0	0	0	0	0	0
	80	Redlich et al. 2014	Design	Exploitation		#N/A		#N/A	#REF!	#REF!	1	0	0	0	0	0	0	0	0	0	0	0	0	1	0	0	0	0	0	0	0	0	1	0	0	0	0	0	0	0.08	0	0	0	0	0	0	0	0	0
	81	Rehse et al. 2016	Design	Exploitation		#N/A		#N/A	#REF!	#REF!	0	0	0	0	0	0	0	0	0	0	0	0	0	1	0	0	0	0	0	0	0	0	0	0	0	0	0	0	0	0	0	0	0	0	0	0	0	0	0
	84	Ruiz et al. 2015	Design	Exploitation		#N/A		#N/A	#REF!	#REF!	0	0	0	0	0	0	0	0	0	0	0	0	0	0	0	0	0	0	0	0	0	1	0	0	0	0	1	0	1	0	0	0	0	0	0	0	0	0	0
	91	Simões et al. 2018	Design	Exploitation		#N/A		#N/A	#REF!	#REF!	0	0	0	0	0	0	0	0	0	0	0	0	0	1	0	0	0	0	0	0	0	0	1	0	0	0	0	0	0	0	0	0	0	0	0	0	0	0	0
	92	Stark and Esswein 2017	Design	Exploitation		#N/A		#N/A	#REF!	#REF!	0	0	0	0	1	0	0	0	0	0	0	0	1	0	0	0	0	0	0	0	0	0	0	0	0	0	0	0	0	0	0	0	0	0	0	0	0	0	0
	97	van der Aa et al. 2017*	Design	Exploitation		#N/A		#N/A	#REF!	#REF!	1	1	1	1	1	1	1	1	1	1	1	1	1	1	0	1	1	1	0	1	1	1	1	1	1	1	1	1	1	0.08	0	0	0.08	0	0.06	0	0.06	0	0.06
	99	Wang et al. 2018	Design	Exploitation		#N/A		#N/A	#REF!	#REF!	0	0	0	0	0	0	1	0	0	0	0	0	0	0	0	0	0	0	0	0	0	0	0	0	0	0	0	0	0	0	0	0	0	0	0	0	0	0	0
	100	Yongchareon et al. 2015	Design	Exploitation		#N/A		#N/A	#REF!	#REF!	1	0	1	0	0	0	0	0	0	0	0	0	0	0	1	0	0	0	0	0	0	1	0	0	0	0	0	0	0	0.08	0	0	0	0	0	0	0	0	0
	102	Zhu et al. 2014*	Design	Exploitation		#N/A		#N/A	#REF!	#REF!	1	1	1	1	0	1	0	1	0	1	1	1	1	1	0	1	1	1	1	1	1	1	0	0	1	1	1	1	0	0.08	0	0	0.08	0	0.06	0	0.06	0	0.06
	30	Fdhila et al. 2015	Implementation	Exploitation		#N/A		#N/A	#REF!	#REF!	1	0	1	0	0	0	0	0	0	0	0	0	0	0	1	0	0	0	1	0	0	0	0	0	0	0	0	0	0	0.08	0	0	0	0	0	0	0	0	0
	43	Johannsen and Fill 2014	Implementation	Exploitation		#N/A		#N/A	#REF!	#REF!	0	0	0	0	0	0	1	0	1	0	0	0	1	0	1	0	0	0	0	0	0	1	0	0	1	0	0	0	0	0	0	0	0	0	0	0	0	0	0
	51	Lanz and Reichert 2014	Implementation	Exploitation		#N/A		#N/A	#REF!	#REF!	1	0	0	0	0	0	0	0	0	0	0	1	0	0	0	0	0	0	0	0	0	0	0	0	0	0	0	0	1	0.08	0	0	0	0	0	0	0	0	0
	57	Lindman et al. 2016	Implementation	Exploitation		#N/A		#N/A	#REF!	#REF!	1	0	0	0	0	0	0	0	0	0	0	0	0	1	0	0	0	0	0	0	0	0	0	0	0	0	1	0	1	0.08	0	0	0	0	0	0	0	0	0
	62	Maamar et al. 2016	Implementation	Exploitation		#N/A		#N/A	#REF!	#REF!	0	0	0	0	0	0	1	0	0	0	0	0	0	1	0	0	0	0	0	0	0	1	0	0	0	0	0	0	1	0	0	0	0	0	0	0	0	0	0
	71	Morana et al. 2014	Implementation	Exploitation		#N/A		#N/A	#REF!	#REF!	0	0	0	0	0	0	0	0	0	0	0	0	1	1	0	0	0	0	0	0	0	0	1	0	0	0	0	0	0	0	0	0	0	0	0	0	0	0	0
	79	Rangiha et al. 2016	Implementation	Exploitation		#N/A		#N/A	#REF!	#REF!	0	0	0	0	1	0	1	0	1	0	0	0	1	1	0	0	0	0	0	0	0	1	0	0	1	0	0	0	0	0	0	0	0	0	0	0	0	0	0
	95	Trkman et al. 2015	Implementation	Exploitation		#N/A		#N/A	#REF!	#REF!	1	0	0	0	0	0	0	0	0	0	0	0	0	0	1	0	0	1	0	0	0	1	0	0	0	0	1	0	0	0.08	0	0	0	0	0	0	0	0	0
	1	Abe and Kudo 2014	Monitoring	Exploitation		#N/A		#N/A	#REF!	#REF!	0	0	0	0	0	0	0	0	0	0	0	0	0	0	0	0	0	0	0	0	0	1	0	0	1	0	0	0	0	0	0	0	0	0	0	0	0	0	0
	2	Accorsi et al. 2015	Monitoring	Exploitation		#N/A		#N/A	#REF!	#REF!	0	0	0	0	0	0	1	0	0	0	0	0	0	0	0	0	0	0	0	0	0	0	0	0	0	0	0	0	0	0	0	0	0	0	0	0	0	0	0
	7	Bala et al. 2015*	Monitoring	Exploitation		#N/A		#N/A	#REF!	#REF!	1	0	0	0	1	1	0	1	0	1	0	1	0	1	0	0	0	1	1	1	1	1	0	0	1	1	1	1	0	0.08	0	0	0	0	0.06	0	0.06	0	0.06
	8	Bala et al. 2017*	Monitoring	Exploitation		#N/A		#N/A	#REF!	#REF!	1	1	1	0	1	0	1	0	1	1	1	1	1	1	0	1	1	1	1	1	1	1	1	1	1	1	1	1	1	0.08	0	0	0	0	0	0	0	0	0.06
	11	Bolsinger et al. 2015*	Monitoring	Exploitation		#N/A		#N/A	#REF!	#REF!	1	0	1	1	0	1	1	1	0	1	0	1	0	1	0	1	1	1	0	1	1	1	1	1	1	1	1	1	0	0.08	0	0	0.08	0	0.06	0	0.06	0	0.06
	12	Bolt et al. 2018	Monitoring	Exploitation		#N/A		#N/A	#REF!	#REF!	0	0	0	0	0	0	0	0	0	0	0	0	1	0	0	0	0	0	0	0	0	1	0	0	0	0	0	0	0	0	0	0	0	0	0	0	0	0	0
	13	Borkowski et al. 2017	Monitoring	Exploitation		#N/A		#N/A	#REF!	#REF!	1	0	0	1	0	0	0	0	0	0	0	0	0	0	1	0	0	0	0	0	0	1	0	0	0	0	0	0	0	0.08	0	0	0.08	0	0	0	0	0	0
	15	Breuker et al. 2016*	Monitoring	Exploitation		#N/A		#N/A	#REF!	#REF!	1	0	1	1	0	1	0	1	0	1	1	1	1	1	1	1	1	1	0	1	1	1	0	1	1	1	1	1	0	0.08	0	0	0.08	0	0.06	0	0.06	0	0.06
	16	Cabanillas et al. 2014*	Monitoring	Exploitation		#N/A		#N/A	#REF!	#REF!	1	1	1	1	0	1	1	1	0	1	0	1	1	1	0	1	1	1	1	1	1	1	0	0	1	1	1	1	0	0.08	0	0	0.08	0	0.06	0	0.06	0	0.06
	18	Cuzzocrea et al. 2018	Monitoring	Exploitation		#N/A		#N/A	#REF!	#REF!	0	0	0	1	0	0	0	0	0	0	1	0	1	0	0	0	0	0	0	0	0	0	0	0	0	0	1	0	1	0	0	0	0.08	0	0	0	0	0	0
	26	di Francescomarino et al. 2017	Monitoring	Exploitation		#N/A		#N/A	#REF!	#REF!	0	0	0	1	0	0	0	0	0	0	0	1	0	0	0	0	0	0	0	0	0	0	0	0	0	0	0	0	0	0	0	0	0.08	0	0	0	0	0	0
	27	Dijkman and Wilbik 2017	Monitoring	Exploitation		#N/A		#N/A	#REF!	#REF!	0	0	0	1	0	0	0	0	0	0	0	0	1	1	0	0	0	0	0	0	0	0	0	0	0	0	0	0	0	0	0	0	0.08	0	0	0	0	0	0
	34	Gómez-López et al. 2015	Monitoring	Exploitation		#N/A		#N/A	#REF!	#REF!	0	0	0	0	0	0	0	0	0	0	0	0	1	0	0	0	0	0	0	0	0	0	0	1	0	0	0	0	0	0	0	0	0	0	0	0	0	0	0
	35	Graupner et al. 2015	Monitoring	Exploitation		#N/A		#N/A	#REF!	#REF!	0	0	0	0	0	0	1	0	1	0	1	0	0	0	0	0	1	1	0	0	0	0	0	0	0	0	0	0	0	0	0	0	0	0	0	0	0	0	0
	47	Knuplesch et al. 2015	Monitoring	Exploitation		#N/A		#N/A	#REF!	#REF!	0	0	0	0	0	0	0	0	0	0	0	0	0	1	0	0	0	0	0	0	0	0	0	0	0	0	0	0	0	0	0	0	0	0	0	0	0	0	0
	48	Knuplesch et al. 2017	Monitoring	Exploitation		#N/A		#N/A	#REF!	#REF!	0	0	0	0	0	0	0	0	0	0	0	0	0	1	0	0	0	0	0	0	0	0	0	0	0	0	0	0	0	0	0	0	0	0	0	0	0	0	0
	63	Maaradji et al. 2015	Monitoring	Exploitation		#N/A		#N/A	#REF!	#REF!	0	0	0	1	0	0	1	0	1	0	1	0	1	0	0	0	0	0	0	0	0	0	0	0	0	0	0	0	1	0	0	0	0.08	0	0	0	0	0	0
	66	Mannhard et al. 2016	Monitoring	Exploitation		#N/A		#N/A	#REF!	#REF!	0	0	0	0	0	0	0	0	0	0	1	0	0	0	0	0	0	0	0	0	0	0	0	0	0	0	0	0	0	0	0	0	0	0	0	0	0	0	0
	67	Marjanovic 2016	Monitoring	Exploitation		#N/A		#N/A	#REF!	#REF!	1	0	0	0	0	0	1	0	0	0	0	0	0	0	0	0	0	0	0	0	1	0	0	0	0	0	1	0	1	0.08	0	0	0	0	0	0	0	0	0
	68	Mehdiyev et al. 2018	Monitoring	Exploitation		#N/A		#N/A	#REF!	#REF!	0	0	0	1	0	0	0	0	0	0	0	1	0	0	0	0	0	0	0	0	0	0	0	0	0	0	0	0	0	0	0	0	0.08	0	0	0	0	0	0
	69	Meroni et al. 2018	Monitoring	Exploitation		#N/A		#N/A	#REF!	#REF!	1	0	0	0	0	0	0	0	0	0	0	0	0	0	1	0	0	0	0	0	0	0	0	0	0	0	0	0	1	0.08	0	0	0	0	0	0	0	0	0
	70	Montani and Leonardi 2014	Monitoring	Exploitation		#N/A		#N/A	#REF!	#REF!	0	0	0	0	0	0	0	0	0	0	0	0	0	0	0	0	0	0	0	0	0	1	0	0	0	0	0	0	0	0	0	0	0	0	0	0	0	0	0
	73	Patiniotakis et al. 2017	Monitoring	Exploitation		#N/A		#N/A	#REF!	#REF!	0	0	0	0	0	0	0	0	0	0	0	0	1	0	0	0	0	0	0	0	0	0	0	0	0	0	0	0	1	0	0	0	0	0	0	0	0	0	0
	74	Pentland et al. 2014	Monitoring	Exploitation		#N/A		#N/A	#REF!	#REF!	0	0	0	1	0	1	0	1	0	1	0	1	0	0	0	0	0	0	0	0	0	0	1	0	0	0	0	0	0	0	0	0	0.08	0	0.06	0	0.06	0	0.06
	83	Rogge-Solti and Weske 2015	Monitoring	Exploitation		#N/A		#N/A	#REF!	#REF!	1	0	0	0	0	0	0	0	0	1	0	0	0	0	0	0	0	0	0	0	0	0	0	0	0	0	1	0	0	0.08	0	0	0	0	0	0	0	0	0.06
	85	Saldivar et al. 2016	Monitoring	Exploitation		#N/A		#N/A	#REF!	#REF!	0	0	0	0	0	0	0	0	0	0	0	0	0	1	0	0	0	0	0	0	0	0	0	0	0	0	0	0	0	0	0	0	0	0	0	0	0	0	0
	86	Satyal et al. 2018	Monitoring	Exploitation		#N/A		#N/A	#REF!	#REF!	0	0	0	0	0	0	0	0	0	0	0	0	0	1	0	0	0	0	0	0	0	1	0	0	0	0	0	0	0	0	0	0	0	0	0	0	0	0	0
	87	Seeliger et al. 2016	Monitoring	Exploitation		#N/A		#N/A	#REF!	#REF!	0	0	0	0	0	0	0	0	0	0	0	0	0	1	0	0	0	0	0	0	0	0	0	0	0	0	0	0	0	0	0	0	0	0	0	0	0	0	0
	88	Senderovich et al. 2014	Monitoring	Exploitation		#N/A		#N/A	#REF!	#REF!	1	0	0	0	0	0	0	0	0	0	0	1	0	0	0	0	1	1	0	0	0	1	0	0	0	0	0	0	0	0.08	0	0	0	0	0	0	0	0	0
	89	Senderovich et al. 2017	Monitoring	Exploitation		#N/A		#N/A	#REF!	#REF!	0	0	0	0	0	0	0	0	0	0	0	0	0	0	0	0	0	0	0	0	0	1	0	0	0	0	0	0	0	0	0	0	0	0	0	0	0	0	0
	90	Senderovich et al. 2018	Monitoring	Exploitation		#N/A		#N/A	#REF!	#REF!	0	0	0	0	0	0	1	0	1	0	1	0	0	0	0	0	0	0	0	0	0	0	0	0	0	0	0	0	0	0	0	0	0	0	0	0	0	0	0
	96	van Beest et al. 2015	Monitoring	Exploitation		#N/A		#N/A	#REF!	#REF!	0	0	0	0	1	0	0	0	0	0	0	0	1	0	0	0	0	0	0	0	0	0	0	0	0	0	0	0	0	0	0	0	0	0	0	0	0	0	0
	98	van der Aa et al. 2018*	Monitoring	Exploitation		#N/A		#N/A	#REF!	#REF!	1	1	1	1	1	1	1	1	1	1	1	1	1	1	0	1	1	1	0	1	1	1	1	1	1	1	1	1	1	0.08	0	0	0.08	0	0.06	0	0.06	0	0.06
	101	Zahoransky et al. 2016	Monitoring	Exploitation		#N/A		#N/A	#REF!	#REF!	0	0	0	0	0	0	0	0	0	0	0	0	0	0	0	0	0	0	1	1	1	0	1	1	0	0	0	0	0	0	0	0	0	0	0	0	0	0	0
	4	Antunes et al. 2014	Improvement and innovation	Exploitation		#N/A		#N/A	#REF!	#REF!	0	0	0	1	0	0	0	0	0	0	1	0	0	1	0	0	0	0	0	0	0	1	0	0	1	0	0	0	0	0	0	0	0.08	0	0	0	0	0	0
	9	Bergener et al. 2015*	Improvement and innovation	Exploitation		#N/A		#N/A	#REF!	#REF!	1	0	1	1	0	1	0	1	0	1	1	1	1	1	1	1	1	1	0	1	1	1	0	1	1	1	1	1	0	0.08	0	0	0.08	0	0.06	0	0.06	0	0.06
	10	Bisogno et al. 2016	Improvement and innovation	Exploitation		#N/A		#N/A	#REF!	#REF!	1	0	0	1	0	0	0	0	1	0	0	1	0	1	0	0	0	0	0	0	1	1	0	0	0	0	0	0	0	0.08	0	0	0.08	0	0	0	0	0	0
	15	Breuker et al. 2016*	Improvement and innovation	Exploitation							1	0	1	1	0	1	0	1	0	1	1	1	1	1	1	1	1	1	0	1	1	1	0	1	1	1	1	1	0	0.08	0	0	0.08	0	0.06	0	0.06	0	0.06
	21	de Pádua et al. 2014	Improvement and innovation	Exploitation		#N/A		#N/A	#REF!	#REF!	0	0	0	1	0	0	1	0	0	0	1	0	1	1	0	0	0	0	0	0	0	1	0	0	0	0	0	0	0	0	0	0	0.08	0	0	0	0	0	0
	24	Denner et al. 2018*	Improvement and innovation	Exploitation		#N/A		#N/A	#REF!	#REF!	1	0	1	1	1	1	1	1	0	1	0	1	0	1	0	1	1	1	0	1	1	1	0	0	1	1	1	1	1	0.08	0	0	0.08	0	0.06	0	0.06	0	0.06
	38	Heinrich and Schön 2015*	Improvement and innovation	Exploitation							1	1	1	1	1	1	0	1	0	1	1	1	1	1	1	1	1	1	1	1	1	1	0	1	1	1	1	1	1	0.08	0	0	0.08	0	0.06	0	0.06	0	0.06
	41	Imgrund et al. 2017*	Improvement and innovation	Exploitation							0	1	1	1	0	1	0	1	1	1	0	1	1	1	0	1	1	1	0	1	1	1	1	1	1	1	1	1	1	0	0	0	0.08	0	0.06	0	0.06	0	0.06
	45	Khlif et al. 2017*	Improvement and innovation	Exploitation		#N/A		#N/A	#REF!	#REF!	1	0	1	1	0	1	1	1	0	1	0	1	0	1	0	1	1	1	0	1	0	1	1	1	1	1	0	1	0	0.08	0	0	0.08	0	0.06	0	0.06	0	0.06
	46	Khosravi 2016	Improvement and innovation	Exploitation		#N/A		#N/A	#REF!	#REF!	0	0	0	0	0	0	0	0	0	0	0	0	0	1	1	0	0	0	0	0	1	1	0	0	1	0	1	0	0	0	0	0	0	0	0	0	0	0	0
	61	Low et al. 2017*	Improvement and innovation	Exploitation		#N/A		#N/A	#REF!	#REF!	1	1	1	1	0	1	1	1	1	1	0	1	1	1	1	1	1	1	1	1	1	1	1	1	1	1	1	1	0	0.08	0	0	0.08	0	0.06	0	0.06	0	0.06
	75	Pereira Librelato et al. 2014	Improvement and innovation	Exploitation		#N/A		#N/A	#REF!	#REF!	1	0	0	1	0	0	0	0	0	0	0	0	0	1	0	1	0	1	0	0	0	0	0	0	0	0	1	0	0	0.08	0	0	0.08	0	0	0	0	0	0
	77	Polpinij et al. 2015	Improvement and innovation	Exploitation		#N/A		#N/A	#REF!	#REF!	1	0	0	1	0	0	0	0	0	0	1	1	0	1	0	0	0	0	0	0	1	1	0	0	1	0	1	0	0	0.08	0	0	0.08	0	0	0	0	0	0
	93	Tax et al. 2018	Improvement and innovation	Exploitation		#N/A		#N/A	#REF!	#REF!	0	0	0	0	1	0	0	0	0	0	1	0	1	0	0	0	0	0	0	0	0	1	0	0	0	0	1	0	0	0	0	0	0	0	0	0	0	0	0
	7	Bala et al. 2015*	Project management	Exploitation							1	0	0	0	1	1	0	1	0	1	0	1	0	1	0	0	0	1	1	1	1	1	0	0	1	1	1	1	0	0.08	0	0	0	0	0.06	0	0.06	0	0.06
	19	de Boer et al. 2015	Project management	Exploitation		#N/A		#N/A	#REF!	#REF!	0	1	0	0	0	0	0	0	0	0	0	0	0	1	0	0	0	0	0	0	1	1	0	0	0	0	0	0	0	0	0	0	0	0	0	0	0	0	0
	32	Fiorentino 2016	Project management	Exploitation		#N/A		#N/A	#REF!	#REF!	0	1	0	0	0	0	0	0	0	0	0	0	0	1	1	0	0	0	0	0	0	0	0	0	0	0	1	0	0	0	0	0	0	0	0	0	0	0	0
	36	Hakim et al. 2016	Project management	Exploitation		#N/A		#N/A	#REF!	#REF!	0	0	0	0	0	0	0	0	0	0	0	0	0	1	0	0	0	0	0	0	0	1	0	0	1	0	1	0	0	0	0	0	0	0	0	0	0	0	0
	52	Lavikka et al. 2015	Project management	Exploitation		#N/A		#N/A	#REF!	#REF!	0	0	0	0	0	0	0	0	0	0	0	0	0	0	1	0	1	0	0	0	0	1	0	0	0	0	1	0	1	0	0	0	0	0	0	0	0	0	0
	53	Lehnert et al. 2014*	Project management	Exploitation		#N/A		#N/A	#REF!	#REF!	1	0	1	1	1	1	1	1	1	1	0	1	1	1	0	1	1	1	0	1	1	1	1	0	1	1	1	1	0	0.08	0	0	0.08	0	0.06	0	0.06	0	0.06
	54	Lehnert et al. 2018*	Project management	Exploitation		#N/A		#N/A	#REF!	#REF!	1	0	1	1	0	1	1	1	1	1	1	1	1	1	0	1	1	1	0	0	1	1	1	0	1	1	1	1	0	0.08	0	0	0.08	0	0.06	0	0.06	0	0.06
	58	Linhart et al. 2015a*	Project management	Exploitation		#N/A		#N/A	#REF!	#REF!	1	0	0	1	0	1	1	1	1	1	0	1	1	1	0	0	1	0	0	1	1	1	1	0	1	1	1	1	0	0.08	0	0	0.08	0	0.06	0	0.06	0	0.06
	59	Linhart et al. 2015b	Project management	Exploitation		#N/A		#N/A	#REF!	#REF!	1	0	0	0	1	0	0	0	0	0	0	0	1	0	0	0	1	1	0	0	0	0	0	0	0	0	0	0	1	0.08	0	0	0	0	0	0	0	0	0
	65	Manderscheid et al. 2015*	Project management	Exploitation		#N/A		#N/A	#REF!	#REF!	1	0	0	1	1	1	1	1	1	1	0	1	1	1	0	1	1	1	0	1	1	1	1	0	1	1	1	1	0	0.08	0	0	0.08	0	0.06	0	0.06	0	0.06
	82	Rocha et al. 2015	Project management	Exploitation		#N/A		#N/A	#REF!	#REF!	0	1	0	1	0	0	0	0	0	0	0	1	0	1	0	0	0	0	0	0	0	0	0	0	1	0	1	0	0	0	0	0	0.08	0	0	0	0	0	0
	103	CAMAS Method*	Project management	Exploitation							1	1	1	1	1	1	1	1	1	1	1	1	1	1	1	1	1	1	1	1	1	1	1	1	1	1	1	1	1	0.08	0	0	0.08	0	0.06	0	0.06	0	0.06
	5	Appel et al. 2014	Design	Exploration		#N/A		#N/A	#REF!	#REF!	0	0	0	1	0	0	0	0	0	0	0	1	0	0	0	0	0	0	0	0	0	0	0	0	0	0	0	0	0	0	0	0	0.08	0	0	0	0	0	0
	38	Heinrich and Schön 2015*	Design	Exploration							1	1	1	1	1	1	0	1	0	1	1	1	1	1	1	1	1	1	1	1	1	1	0	1	1	1	1	1	1	0.08	0	0	0.08	0	0.06	0	0.06	0	0.06
	50	La Rosa et al. 2015*	Design	Exploration							1	0	1	1	0	1	0	1	0	1	1	1	1	1	0	1	1	1	0	0	1	1	0	0	1	1	1	1	0	0.08	0	0	0.08	0	0.06	0	0.06	0	0.06
	84	Ruiz et al. 2015	Design	Exploration		#N/A		#N/A	#REF!	#REF!	0	0	0	0	0	0	0	0	0	0	0	0	0	0	0	0	0	0	0	0	0	1	0	0	0	0	1	0	1	0	0	0	0	0	0	0	0	0	0
	57	Lindman et al. 2016	Implementation	Exploration		#N/A		#N/A	#REF!	#REF!	1	0	0	0	0	0	0	0	0	0	0	0	0	1	0	0	0	0	0	0	0	0	0	0	0	0	1	0	1	0.08	0	0	0	0	0	0	0	0	0
	95	Trkman et al. 2015	Implementation	Exploration		#N/A		#N/A	#REF!	#REF!	1	0	0	0	0	0	0	0	0	0	0	0	0	0	1	0	0	1	0	0	0	1	0	0	0	0	1	0	0	0.08	0	0	0	0	0	0	0	0	0
	94	Teinemaa et al. 2016*	Monitoring	Exploration		#N/A		#N/A	#REF!	#REF!	1	0	1	1	0	1	1	1	1	1	1	1	1	1	0	1	1	1	0	1	1	1	1	0	1	1	1	1	1	0.08	0	0	0.08	0	0.06	0	0.06	0	0.06
	38	Heinrich and Schön 2015*	Improvement and innovation	Exploration							1	1	1	1	1	1	0	1	0	1	1	1	1	1	1	1	1	1	1	1	1	1	0	1	1	1	1	1	1	0.08	0	0	0.08	0	0.06	0	0.06	0	0.06
	94	Teinemaa et al. 2016*	Improvement and innovation	Exploration		#N/A		#N/A	#REF!	#REF!	1	0	1	1	0	1	1	1	1	1	1	1	1	1	0	1	1	1	0	1	1	1	1	0	1	1	1	1	1	0.08	0	0	0.08	0	0.06	0	0.06	0	0.06
	*	BPM method assessed by original BPM method engineer
[truncated: 22 more columns]

## Sheet: Selection Process_risk-taking
	For details on the application of the Excel prototype see Section 4.4
											Context dimension (see Activity S3)
											0.4													0.3												0.3				0.6
											Process dimension													Organization dimension												Environment dimension				Process dimension
					Further evaluation critria						0.2			0.2		0.15		0.15		0.15		0.15		0.2		0.2			0.2			0.2		0.2		0.5		0.5		0.2			0.2		0.2		0.2		0.1
					Criteria "ease-of-use"		Criteria "training effort"		Overall results		Value contribution			Repetitive-ness		Knowledge intensity		Creativity		Inter-dependence		Variability		Scope		Industry			Size			Culture		Resources		Competitive-ness		Uncertainty		Value contribution			Repetitive-ness		Knowledge intensity		Creativity		Inter-dependence
					Assessment "ease-of-use" (Scale: 3 - easy, 2 - medium, 1 - difficult)	Rank "ease-of-use"	Assessment "training effort" (Scale: 3 - high, 2 - medium, 1 - low)	Rank "training effort"	Sum of all ranks (context awareness, ease-of-use, training effort)	Overall rank (context awareness, ease-of-use, training effort)	Core process	Management process	Support process	Repetitive	Non-repetitive	Low knowledge-intensity	High knowledge-intensity	Low creativity	High creativity	Low interdependence	High interdependence	Low variability	High variablity	Intra-organizational processes	Inter-organizational processes	Product industry	Service industry	Product & service industry	Start-up	Small and medium enterprise	Large organization	Culture highly supportive of BPM	Culture non-supportive of BPM	Low organizational resources	High organizational resources	Low competetive environment	High competetive environment	Low environmental uncertainty	High environmental uncertainty	Core process	Management process	Support process	Repetitive	Non-repetitive	Low knowledge-intensity	High knowledge-intensity	Low creativity	High creativity	Low interdependence
	ID	Author	Lifecycle dimension (see Activity S1)	Goal dimension (see Activity S2)							1	0	0	1	0	1	0	1	0	1	0	1	0	1	0	0	0	1	0	1	0	0	1	0	1	1	0	1	0
	3	Anastassiu et al. 2016	Design	Exploitation		#N/A		#N/A	#REF!	#REF!	1	1	1	1	1	1	1	1	1	1	1	1	1	1	1	1	1	1	1	1	1	1	1	1	1	1	1	1	1	0.08	0	0	0.08	0	0.06	0	0.06	0	0.06
	5	Appel et al. 2014	Design	Exploitation		#N/A		#N/A	#REF!	#REF!	1	1	1	1	1	1	1	1	1	1	1	1	0	1	1	1	1	1	1	1	1	1	1	1	1	1	1	1	1	0.08	0	0	0.08	0	0.06	0	0.06	0	0.06
	6	Atkinson et al. 2015	Design	Exploitation		#N/A		#N/A	#REF!	#REF!	1	1	1	1	1	1	1	1	1	1	1	1	1	1	1	1	1	1	1	1	1	1	0	1	1	1	1	1	1	0.08	0	0	0.08	0	0.06	0	0.06	0	0.06
	9	Bergener et al. 2015*	Design	Exploitation		#N/A		#N/A	#REF!	#REF!	1	0	1	1	0	1	0	1	0	1	1	1	1	1	1	1	1	1	0	1	1	1	0	1	1	1	1	1	0	0.08	0	0	0.08	0	0.06	0	0.06	0	0.06
	14	Boubeta-Puig et al. 2017	Design	Exploitation		#N/A		#N/A	#REF!	#REF!	1	1	1	1	1	1	1	1	1	1	1	1	1	1	1	1	1	1	1	1	1	1	1	1	1	1	1	1	1	0.08	0	0	0.08	0	0.06	0	0.06	0	0.06
	17	Cabanillas et al. 2015	Design	Exploitation		#N/A		#N/A	#REF!	#REF!	1	1	1	1	1	1	1	1	1	1	1	1	1	1	1	1	1	1	1	1	1	1	1	1	1	1	1	1	1	0.08	0	0	0.08	0	0.06	0	0.06	0	0.06
	20	de Leoni et al. 2015	Design	Exploitation		#N/A		#N/A	#REF!	#REF!	1	1	1	1	1	1	1	1	1	1	1	1	1	1	1	1	1	1	1	1	1	1	1	1	1	1	1	1	1	0.08	0	0	0.08	0	0.06	0	0.06	0	0.06
	22	Debois et al. 2014	Design	Exploitation		#N/A		#N/A	#REF!	#REF!	1	1	1	1	1	1	1	1	1	1	1	1	0	1	1	1	1	1	1	1	1	1	1	1	1	1	1	1	1	0.08	0	0	0.08	0	0.06	0	0.06	0	0.06
	23	del-Río-Ortega et al. 2017	Design	Exploitation		#N/A		#N/A	#REF!	#REF!	1	1	1	1	1	1	1	1	1	1	1	1	1	1	0	1	1	1	1	1	1	1	1	1	1	1	1	1	1	0.08	0	0	0.08	0	0.06	0	0.06	0	0.06
	25	Derguech et al. 2017	Design	Exploitation		#N/A		#N/A	#REF!	#REF!	1	1	1	1	1	1	1	1	1	1	1	1	1	1	1	1	1	1	1	1	1	1	1	1	1	1	1	1	1	0.08	0	0	0.08	0	0.06	0	0.06	0	0.06
	28	do Prado Leite et al. 2016	Design	Exploitation		#N/A		#N/A	#REF!	#REF!	1	1	1	1	1	1	1	1	1	1	1	1	1	1	1	1	1	1	1	1	1	1	1	1	1	1	1	1	1	0.08	0	0	0.08	0	0.06	0	0.06	0	0.06
	29	Fahland and Völzer 2018	Design	Exploitation		#N/A		#N/A	#REF!	#REF!	1	1	1	1	1	1	1	1	1	1	1	1	1	1	1	1	1	1	1	1	1	1	1	1	1	1	1	1	1	0.08	0	0	0.08	0	0.06	0	0.06	0	0.06
	31	Fengel 2014	Design	Exploitation		#N/A		#N/A	#REF!	#REF!	1	1	1	1	1	1	1	1	1	1	1	1	1	1	0	1	1	1	0	1	1	1	0	1	1	1	1	1	1	0.08	0	0	0.08	0	0.06	0	0.06	0	0.06
	33	Gailly et al. 2017	Design	Exploitation		#N/A		#N/A	#REF!	#REF!	1	1	1	1	1	1	1	1	1	1	1	1	1	1	1	1	1	1	1	1	1	1	0	1	1	1	1	1	1	0.08	0	0	0.08	0	0.06	0	0.06	0	0.06
	37	Harman et al. 2016	Design	Exploitation		#N/A		#N/A	#REF!	#REF!	1	1	1	1	1	1	1	1	1	1	1	1	1	1	1	1	1	1	1	1	1	1	1	1	1	1	1	1	1	0.08	0	0	0.08	0	0.06	0	0.06	0	0.06
	38	Heinrich and Schön 2015*	Design	Exploitation		#N/A		#N/A	#REF!	#REF!	1	1	1	1	1	1	0	1	0	1	1	1	1	1	1	1	1	1	1	1	1	1	0	1	1	1	1	1	1	0.08	0	0	0.08	0	0.06	0	0.06	0	0.06
	39	Heinrich and Schön 2016	Design	Exploitation		#N/A		#N/A	#REF!	#REF!	1	1	1	1	1	1	1	1	1	1	1	1	1	1	1	1	1	1	1	1	1	1	0	1	1	1	1	0	1	0.08	0	0	0.08	0	0.06	0	0.06	0	0.06
	40	Hotie and Gordijn 2017	Design	Exploitation		#N/A		#N/A	#REF!	#REF!	1	1	1	1	1	1	1	1	1	1	1	1	1	1	0	1	1	1	1	1	1	1	1	1	1	1	1	1	1	0.08	0	0	0.08	0	0.06	0	0.06	0	0.06
	41	Imgrund et al. 2017*	Design	Exploitation		#N/A		#N/A	#REF!	#REF!	0	1	1	1	0	1	0	1	1	1	0	1	1	1	0	1	1	1	0	1	1	1	1	1	1	1	1	1	1	0	0	0	0.08	0	0.06	0	0.06	0	0.06
	42	Janiesch and Diebold 2016	Design	Exploitation		#N/A		#N/A	#REF!	#REF!	1	1	1	1	1	1	1	1	1	1	1	1	1	1	1	1	1	1	1	1	1	1	1	1	1	1	1	1	1	0.08	0	0	0.08	0	0.06	0	0.06	0	0.06
	44	Jouck and Depaire 2018	Design	Exploitation		#N/A		#N/A	#REF!	#REF!	1	1	1	1	1	1	1	1	1	1	1	1	1	1	1	1	1	1	0	1	1	1	1	1	1	1	1	1	1	0.08	0	0	0.08	0	0.06	0	0.06	0	0.06
	45	Khlif et al. 2017*	Design	Exploitation							1	0	1	1	0	1	1	1	0	1	0	1	0	1	0	1	1	1	0	1	0	1	1	1	1	1	0	1	0	0.08	0	0	0.08	0	0.06	0	0.06	0	0.06
	49	Krumeich et al. 2014	Design	Exploitation		#N/A		#N/A	#REF!	#REF!	1	1	1	1	1	1	1	1	1	1	1	1	1	1	1	1	1	1	1	1	1	1	1	1	1	1	1	1	1	0.08	0	0	0.08	0	0.06	0	0.06	0	0.06
	50	La Rosa et al. 2015*	Design	Exploitation		#N/A		#N/A	#REF!	#REF!	1	0	1	1	0	1	0	1	0	1	1	1	1	1	0	1	1	1	0	0	1	1	0	0	1	1	1	1	0	0.08	0	0	0.08	0	0.06	0	0.06	0	0.06
	55	Leopold et al. 2014	Design	Exploitation		#N/A		#N/A	#REF!	#REF!	1	1	1	1	1	1	1	1	1	1	1	1	1	1	1	1	1	1	0	1	1	1	1	1	1	1	1	1	1	0.08	0	0	0.08	0	0.06	0	0.06	0	0.06
	56	Liesaputra et al. 2015	Design	Exploitation		#N/A		#N/A	#REF!	#REF!	1	1	1	1	1	1	1	1	1	1	1	1	1	1	1	1	1	1	1	1	1	1	1	1	1	1	1	1	1	0.08	0	0	0.08	0	0.06	0	0.06	0	0.06
	60	Liptchinsky et al. 2014	Design	Exploitation		#N/A		#N/A	#REF!	#REF!	1	1	1	1	1	1	1	1	1	1	1	1	1	1	1	1	1	1	1	1	1	1	1	1	1	1	1	1	1	0.08	0	0	0.08	0	0.06	0	0.06	0	0.06
	64	Maggi et al. 2014	Design	Exploitation		#N/A		#N/A	#REF!	#REF!	1	1	1	1	1	1	1	1	1	1	1	1	1	1	1	1	1	1	1	1	1	1	1	1	1	1	1	1	1	0.08	0	0	0.08	0	0.06	0	0.06	0	0.06
	72	Mrasek et al. 2015	Design	Exploitation		#N/A		#N/A	#REF!	#REF!	1	1	1	1	1	1	1	1	1	1	1	1	1	1	1	1	1	1	1	1	1	1	1	1	1	1	1	1	1	0.08	0	0	0.08	0	0.06	0	0.06	0	0.06
	76	Pittl et al. 2017	Design	Exploitation		#N/A		#N/A	#REF!	#REF!	1	1	1	1	1	1	1	1	1	1	1	1	1	1	1	1	1	1	1	1	1	1	1	1	1	1	1	1	1	0.08	0	0	0.08	0	0.06	0	0.06	0	0.06
	78	Ponce-de-León et al. 2015	Design	Exploitation		#N/A		#N/A	#REF!	#REF!	1	1	1	1	1	1	1	1	1	1	1	1	1	1	1	1	1	1	1	1	1	1	1	1	1	1	1	1	1	0.08	0	0	0.08	0	0.06	0	0.06	0	0.06
	80	Redlich et al. 2014	Design	Exploitation		#N/A		#N/A	#REF!	#REF!	1	1	1	1	1	1	1	1	1	1	1	1	1	1	0	1	1	1	1	1	1	1	1	1	1	1	1	1	1	0.08	0	0	0.08	0	0.06	0	0.06	0	0.06
	81	Rehse et al. 2016	Design	Exploitation		#N/A		#N/A	#REF!	#REF!	1	1	1	1	1	1	0	1	0	0	1	1	0	1	0	1	1	1	0	1	1	1	0	1	1	1	1	1	1	0.08	0	0	0.08	0	0.06	0	0.06	0	0
	84	Ruiz et al. 2015	Design	Exploitation		#N/A		#N/A	#REF!	#REF!	1	1	1	1	1	1	1	1	1	1	1	1	1	1	1	1	1	1	1	1	1	1	1	1	1	1	1	1	1	0.08	0	0	0.08	0	0.06	0	0.06	0	0.06
	91	Simões et al. 2018	Design	Exploitation		#N/A		#N/A	#REF!	#REF!	1	1	1	1	1	1	1	1	1	1	1	1	1	1	0	1	1	1	1	1	1	1	1	1	1	1	1	1	1	0.08	0	0	0.08	0	0.06	0	0.06	0	0.06
	92	Stark and Esswein 2017	Design	Exploitation		#N/A		#N/A	#REF!	#REF!	1	1	1	1	1	1	1	1	1	1	1	1	1	1	1	1	1	1	1	1	1	1	1	1	1	1	1	1	1	0.08	0	0	0.08	0	0.06	0	0.06	0	0.06
	97	van der Aa et al. 2017*	Design	Exploitation		#N/A		#N/A	#REF!	#REF!	1	1	1	1	1	1	1	1	1	1	1	1	1	1	0	1	1	1	0	1	1	1	1	1	1	1	1	1	1	0.08	0	0	0.08	0	0.06	0	0.06	0	0.06
	99	Wang et al. 2018	Design	Exploitation		#N/A		#N/A	#REF!	#REF!	1	1	1	1	1	1	1	1	1	1	1	1	1	1	1	1	1	1	1	1	1	1	1	1	1	1	1	1	1	0.08	0	0	0.08	0	0.06	0	0.06	0	0.06
	100	Yongchareon et al. 2015	Design	Exploitation		#N/A		#N/A	#REF!	#REF!	1	1	1	1	1	1	1	1	1	1	1	1	1	0	1	1	1	1	1	1	1	1	0	1	1	1	1	1	1	0.08	0	0	0.08	0	0.06	0	0.06	0	0.06
	102	Zhu et al. 2014*	Design	Exploitation		#N/A		#N/A	#REF!	#REF!	1	1	1	1	0	1	0	1	0	1	1	1	1	1	0	1	1	1	1	1	1	1	0	0	1	1	1	1	0	0.08	0	0	0.08	0	0.06	0	0.06	0	0.06
	30	Fdhila et al. 2015	Implementation	Exploitation		#N/A		#N/A	#REF!	#REF!	1	1	1	1	1	1	1	1	1	1	1	1	1	0	1	1	1	1	1	1	1	1	1	1	1	1	1	1	1	0.08	0	0	0.08	0	0.06	0	0.06	0	0.06
	43	Johannsen and Fill 2014	Implementation	Exploitation		#N/A		#N/A	#REF!	#REF!	1	1	1	1	1	0	1	0	1	1	1	0	1	0	1	1	1	1	1	1	1	1	1	1	1	1	1	1	1	0.08	0	0	0.08	0	0	0	0	0	0.06
	51	Lanz and Reichert 2014	Implementation	Exploitation		#N/A		#N/A	#REF!	#REF!	1	1	1	1	1	1	1	1	1	1	1	1	0	1	1	1	1	1	1	1	1	1	1	1	1	1	1	0	1	0.08	0	0	0.08	0	0.06	0	0.06	0	0.06
	57	Lindman et al. 2016	Implementation	Exploitation		#N/A		#N/A	#REF!	#REF!	1	0	0	1	1	1	1	1	1	1	1	1	1	1	1	1	1	1	1	1	1	1	1	1	1	0	1	0	1	0.08	0	0	0.08	0	0.06	0	0.06	0	0.06
	62	Maamar et al. 2016	Implementation	Exploitation		#N/A		#N/A	#REF!	#REF!	1	1	1	1	1	1	1	1	1	1	1	1	1	1	1	1	1	1	1	1	1	1	1	1	1	1	1	1	1	0.08	0	0	0.08	0	0.06	0	0.06	0	0.06
	71	Morana et al. 2014	Implementation	Exploitation		#N/A		#N/A	#REF!	#REF!	1	1	1	1	1	1	1	1	1	1	1	1	1	1	1	1	1	1	1	1	1	1	1	1	1	1	1	1	1	0.08	0	0	0.08	0	0.06	0	0.06	0	0.06
	79	Rangiha et al. 2016	Implementation	Exploitation		#N/A		#N/A	#REF!	#REF!	1	1	1	0	1	1	1	1	1	1	1	0	1	1	1	1	1	1	1	1	1	1	1	1	1	1	1	1	1	0.08	0	0	0	0	0.06	0	0.06	0	0.06
	95	Trkman et al. 2015	Implementation	Exploitation		#N/A		#N/A	#REF!	#REF!	1	0	0	1	1	1	1	1	1	1	1	1	1	0	1	1	1	1	1	1	1	1	1	1	1	1	1	1	1	0.08	0	0	0.08	0	0.06	0	0.06	0	0.06
	1	Abe and Kudo 2014	Monitoring	Exploitation		#N/A		#N/A	#REF!	#REF!	1	1	1	1	1	1	1	1	1	1	1	1	1	1	1	1	1	1	1	1	1	1	1	1	1	1	1	1	1	0.08	0	0	0.08	0	0.06	0	0.06	0	0.06
	2	Accorsi et al. 2015	Monitoring	Exploitation		#N/A		#N/A	#REF!	#REF!	1	1	1	1	1	1	1	1	1	1	1	1	1	1	1	1	1	1	1	1	1	1	1	1	1	1	1	1	1	0.08	0	0	0.08	0	0.06	0	0.06	0	0.06
	7	Bala et al. 2015*	Monitoring	Exploitation		#N/A		#N/A	#REF!	#REF!	1	0	0	0	1	1	0	1	0	1	0	1	0	1	0	0	0	1	1	1	1	1	0	0	1	1	1	1	0	0.08	0	0	0	0	0.06	0	0.06	0	0.06
	8	Bala et al. 2017*	Monitoring	Exploitation		#N/A		#N/A	#REF!	#REF!	1	1	1	0	1	0	1	0	1	1	1	1	1	1	0	1	1	1	1	1	1	1	1	1	1	1	1	1	1	0.08	0	0	0	0	0	0	0	0	0.06
	11	Bolsinger et al. 2015*	Monitoring	Exploitation		#N/A		#N/A	#REF!	#REF!	1	0	1	1	0	1	1	1	0	1	0	1	0	1	0	1	1	1	0	1	1	1	1	1	1	1	1	1	0	0.08	0	0	0.08	0	0.06	0	0.06	0	0.06
	12	Bolt et al. 2018	Monitoring	Exploitation		#N/A		#N/A	#REF!	#REF!	1	1	1	1	1	1	1	1	1	1	1	0	1	1	1	1	1	1	1	1	1	1	1	1	1	1	1	1	1	0.08	0	0	0.08	0	0.06	0	0.06	0	0.06
	13	Borkowski et al. 2017	Monitoring	Exploitation		#N/A		#N/A	#REF!	#REF!	1	1	1	1	1	1	1	1	1	1	1	1	1	0	1	1	1	1	1	1	1	1	1	1	1	1	1	1	1	0.08	0	0	0.08	0	0.06	0	0.06	0	0.06
	15	Breuker et al. 2016*	Monitoring	Exploitation		#N/A		#N/A	#REF!	#REF!	1	0	1	1	0	1	0	1	0	1	1	1	1	1	1	1	1	1	0	1	1	1	0	1	1	1	1	1	0	0.08	0	0	0.08	0	0.06	0	0.06	0	0.06
	16	Cabanillas et al. 2014*	Monitoring	Exploitation		#N/A		#N/A	#REF!	#REF!	1	1	1	1	0	1	1	1	0	1	0	1	1	1	0	1	1	1	1	1	1	1	0	0	1	1	1	1	0	0.08	0	0	0.08	0	0.06	0	0.06	0	0.06
	18	Cuzzocrea et al. 2018	Monitoring	Exploitation		#N/A		#N/A	#REF!	#REF!	1	1	1	1	1	1	1	1	1	1	1	1	1	1	1	1	1	1	1	1	1	1	1	1	1	1	1	1	1	0.08	0	0	0.08	0	0.06	0	0.06	0	0.06
	26	di Francescomarino et al. 2017	Monitoring	Exploitation		#N/A		#N/A	#REF!	#REF!	1	1	1	1	1	1	1	1	1	1	1	1	0	1	1	1	1	1	1	1	1	1	1	1	1	1	1	1	1	0.08	0	0	0.08	0	0.06	0	0.06	0	0.06
	27	Dijkman and Wilbik 2017	Monitoring	Exploitation		#N/A		#N/A	#REF!	#REF!	1	1	1	1	1	1	1	1	1	1	1	1	1	1	1	1	1	1	1	1	1	1	1	1	1	1	1	1	1	0.08	0	0	0.08	0	0.06	0	0.06	0	0.06
	34	Gómez-López et al. 2015	Monitoring	Exploitation		#N/A		#N/A	#REF!	#REF!	1	1	1	1	1	1	1	1	1	1	1	1	1	1	1	1	1	1	1	1	1	1	1	1	1	1	1	1	1	0.08	0	0	0.08	0	0.06	0	0.06	0	0.06
	35	Graupner et al. 2015	Monitoring	Exploitation		#N/A		#N/A	#REF!	#REF!	1	1	1	1	1	1	1	1	1	1	1	1	0	1	1	0	1	1	1	1	1	1	1	1	1	1	1	1	1	0.08	0	0	0.08	0	0.06	0	0.06	0	0.06
	47	Knuplesch et al. 2015	Monitoring	Exploitation		#N/A		#N/A	#REF!	#REF!	1	1	1	1	1	1	1	1	1	1	1	1	1	1	0	1	1	1	1	1	1	1	1	1	1	1	1	1	1	0.08	0	0	0.08	0	0.06	0	0.06	0	0.06
	48	Knuplesch et al. 2017	Monitoring	Exploitation		#N/A		#N/A	#REF!	#REF!	1	1	1	1	1	1	1	1	1	1	1	1	1	1	0	1	1	1	1	1	1	1	1	1	1	1	1	1	1	0.08	0	0	0.08	0	0.06	0	0.06	0	0.06
	63	Maaradji et al. 2015	Monitoring	Exploitation		#N/A		#N/A	#REF!	#REF!	1	1	1	1	1	1	1	1	1	1	1	0	1	1	1	1	1	1	1	1	1	1	1	1	1	1	1	1	1	0.08	0	0	0.08	0	0.06	0	0.06	0	0.06
	66	Mannhard et al. 2016	Monitoring	Exploitation		#N/A		#N/A	#REF!	#REF!	1	1	1	1	1	1	1	1	1	1	1	1	1	1	1	1	1	1	1	1	1	1	1	1	1	1	1	1	1	0.08	0	0	0.08	0	0.06	0	0.06	0	0.06
	67	Marjanovic 2016	Monitoring	Exploitation		#N/A		#N/A	#REF!	#REF!	1	1	1	1	1	0	1	1	1	1	1	1	1	1	1	1	1	1	0	1	1	1	1	1	1	1	1	1	1	0.08	0	0	0.08	0	0	0	0.06	0	0.06
	68	Mehdiyev et al. 2018	Monitoring	Exploitation		#N/A		#N/A	#REF!	#REF!	1	1	1	1	1	1	1	1	1	1	1	1	0	1	1	1	1	1	1	1	1	1	1	1	1	1	1	1	1	0.08	0	0	0.08	0	0.06	0	0.06	0	0.06
	69	Meroni et al. 2018	Monitoring	Exploitation		#N/A		#N/A	#REF!	#REF!	1	0	0	1	1	1	1	1	1	1	1	1	1	0	1	1	1	1	1	1	1	1	1	1	1	1	1	1	1	0.08	0	0	0.08	0	0.06	0	0.06	0	0.06
	70	Montani and Leonardi 2014	Monitoring	Exploitation		#N/A		#N/A	#REF!	#REF!	1	1	1	1	1	1	1	1	1	1	1	1	1	1	1	1	1	1	1	1	1	1	1	1	1	1	1	1	1	0.08	0	0	0.08	0	0.06	0	0.06	0	0.06
	73	Patiniotakis et al. 2017	Monitoring	Exploitation		#N/A		#N/A	#REF!	#REF!	1	1	1	1	1	1	1	1	1	1	1	0	1	1	1	1	1	1	1	1	1	1	1	1	1	1	1	1	1	0.08	0	0	0.08	0	0.06	0	0.06	0	0.06
	74	Pentland et al. 2014	Monitoring	Exploitation		#N/A		#N/A	#REF!	#REF!	1	1	1	1	1	1	1	1	1	1	0	1	0	1	1	1	1	1	1	1	1	1	1	1	1	1	1	1	1	0.08	0	0	0.08	0	0.06	0	0.06	0	0.06
	83	Rogge-Solti and Weske 2015	Monitoring	Exploitation		#N/A		#N/A	#REF!	#REF!	1	0	0	1	1	1	1	1	1	1	0	1	1	1	1	1	1	1	1	1	1	1	1	1	1	1	1	1	1	0.08	0	0	0.08	0	0.06	0	0.06	0	0.06
	85	Saldivar et al. 2016	Monitoring	Exploitation		#N/A		#N/A	#REF!	#REF!	1	1	1	1	1	1	1	1	1	1	1	1	1	1	0	1	1	1	1	1	1	1	1	1	1	1	1	1	1	0.08	0	0	0.08	0	0.06	0	0.06	0	0.06
	86	Satyal et al. 2018	Monitoring	Exploitation		#N/A		#N/A	#REF!	#REF!	1	1	1	1	1	1	1	1	1	1	1	1	1	1	0	1	1	1	0	1	1	1	1	1	1	1	1	1	1	0.08	0	0	0.08	0	0.06	0	0.06	0	0.06
	87	Seeliger et al. 2016	Monitoring	Exploitation		#N/A		#N/A	#REF!	#REF!	1	1	1	1	1	1	1	1	1	1	1	1	1	1	1	1	1	1	1	1	1	1	1	1	1	1	1	1	1	0.08	0	0	0.08	0	0.06	0	0.06	0	0.06
	88	Senderovich et al. 2014	Monitoring	Exploitation		#N/A		#N/A	#REF!	#REF!	1	1	1	1	1	1	1	1	1	1	1	1	1	1	1	1	1	1	0	1	1	1	0	1	1	1	1	1	1	0.08	0	0	0.08	0	0.06	0	0.06	0	0.06
	89	Senderovich et al. 2017	Monitoring	Exploitation		#N/A		#N/A	#REF!	#REF!	1	1	1	1	1	1	1	1	1	1	1	1	1	1	1	1	1	1	1	1	1	1	0	1	1	1	1	1	1	0.08	0	0	0.08	0	0.06	0	0.06	0	0.06
	90	Senderovich et al. 2018	Monitoring	Exploitation		#N/A		#N/A	#REF!	#REF!	1	1	1	1	1	1	1	1	1	1	1	1	1	1	1	1	1	1	1	1	1	1	1	1	1	1	1	1	1	0.08	0	0	0.08	0	0.06	0	0.06	0	0.06
	96	van Beest et al. 2015	Monitoring	Exploitation		#N/A		#N/A	#REF!	#REF!	1	1	1	1	1	1	1	1	1	1	1	1	1	1	1	1	1	1	1	1	1	1	1	1	1	1	1	1	1	0.08	0	0	0.08	0	0.06	0	0.06	0	0.06
	98	van der Aa et al. 2018*	Monitoring	Exploitation		#N/A		#N/A	#REF!	#REF!	1	1	1	1	1	1	1	1	1	1	1	1	1	1	0	1	1	1	0	1	1	1	1	1	1	1	1	1	1	0.08	0	0	0.08	0	0.06	0	0.06	0	0.06
	101	Zahoransky et al. 2016	Monitoring	Exploitation		#N/A		#N/A	#REF!	#REF!	1	1	1	1	1	1	1	1	1	1	1	1	1	1	1	1	1	1	1	1	1	1	1	1	1	1	1	1	1	0.08	0	0	0.08	0	0.06	0	0.06	0	0.06
	4	Antunes et al. 2014	Improvement and innovation	Exploitation		#N/A		#N/A	#REF!	#REF!	1	1	1	1	1	1	1	1	1	1	1	1	1	1	1	1	1	1	1	1	1	1	0	1	1	1	1	1	1	0.08	0	0	0.08	0	0.06	0	0.06	0	0.06
	9	Bergener et al. 2015*	Improvement and innovation	Exploitation		#N/A		#N/A	#REF!	#REF!	1	0	1	1	0	1	0	1	0	1	1	1	1	1	1	1	1	1	0	1	1	1	0	1	1	1	1	1	0	0.08	0	0	0.08	0	0.06	0	0.06	0	0.06
	10	Bisogno et al. 2016	Improvement and innovation	Exploitation		#N/A		#N/A	#REF!	#REF!	1	1	1	1	1	1	1	1	1	1	1	1	1	1	0	1	1	1	1	1	1	1	0	1	1	1	1	1	1	0.08	0	0	0.08	0	0.06	0	0.06	0	0.06
	15	Breuker et al. 2016*	Improvement and innovation	Exploitation							1	0	1	1	0	1	0	1	0	1	1	1	1	1	1	1	1	1	0	1	1	1	0	1	1	1	1	1	0	0.08	0	0	0.08	0	0.06	0	0.06	0	0.06
	21	de Pádua et al. 2014	Improvement and innovation	Exploitation		#N/A		#N/A	#REF!	#REF!	1	1	1	1	1	1	1	1	1	1	1	1	1	1	0	1	1	1	1	1	1	1	1	1	1	1	1	1	1	0.08	0	0	0.08	0	0.06	0	0.06	0	0.06
	24	Denner et al. 2018*	Improvement and innovation	Exploitation		#N/A		#N/A	#REF!	#REF!	1	0	1	1	1	1	1	1	0	1	0	1	0	1	0	1	1	1	0	1	1	1	0	0	1	1	1	1	1	0.08	0	0	0.08	0	0.06	0	0.06	0	0.06
	38	Heinrich and Schön 2015*	Improvement and innovation	Exploitation							1	1	1	1	1	1	0	1	0	1	1	1	1	1	1	1	1	1	1	1	1	1	0	1	1	1	1	1	1	0.08	0	0	0.08	0	0.06	0	0.06	0	0.06
	41	Imgrund et al. 2017*	Improvement and innovation	Exploitation							0	1	1	1	0	1	0	1	1	1	0	1	1	1	0	1	1	1	0	1	1	1	1	1	1	1	1	1	1	0	0	0	0.08	0	0.06	0	0.06	0	0.06
	45	Khlif et al. 2017*	Improvement and innovation	Exploitation		#N/A		#N/A	#REF!	#REF!	1	0	1	1	0	1	1	1	0	1	0	1	0	1	0	1	1	1	0	1	0	1	1	1	1	1	0	1	0	0.08	0	0	0.08	0	0.06	0	0.06	0	0.06
	46	Khosravi 2016	Improvement and innovation	Exploitation		#N/A		#N/A	#REF!	#REF!	1	1	1	1	1	1	1	1	1	1	1	1	1	1	1	1	1	1	0	1	1	1	0	0	1	0	1	1	1	0.08	0	0	0.08	0	0.06	0	0.06	0	0.06
	61	Low et al. 2017*	Improvement and innovation	Exploitation		#N/A		#N/A	#REF!	#REF!	1	1	1	1	0	1	1	1	1	1	0	1	1	1	1	1	1	1	1	1	1	1	1	1	1	1	1	1	0	0.08	0	0	0.08	0	0.06	0	0.06	0	0.06
	75	Pereira Librelato et al. 2014	Improvement and innovation	Exploitation		#N/A		#N/A	#REF!	#REF!	1	0	0	1	1	1	1	1	1	1	1	1	0	1	0	1	0	1	1	1	1	1	1	1	1	1	1	1	1	0.08	0	0	0.08	0	0.06	0	0.06	0	0.06
	77	Polpinij et al. 2015	Improvement and innovation	Exploitation		#N/A		#N/A	#REF!	#REF!	1	0	1	1	1	1	1	1	1	1	1	1	1	1	0	1	1	1	0	1	1	1	0	0	1	1	1	1	1	0.08	0	0	0.08	0	0.06	0	0.06	0	0.06
	93	Tax et al. 2018	Improvement and innovation	Exploitation		#N/A		#N/A	#REF!	#REF!	1	1	1	1	1	1	1	1	1	1	1	1	1	1	1	1	1	1	1	1	1	1	1	1	1	1	1	1	1	0.08	0	0	0.08	0	0.06	0	0.06	0	0.06
	7	Bala et al. 2015*	Project management	Exploitation							1	0	0	0	1	1	0	1	0	1	0	1	0	1	0	0	0	1	1	1	1	1	0	0	1	1	1	1	0	0.08	0	0	0	0	0.06	0	0.06	0	0.06
	19	de Boer et al. 2015	Project management	Exploitation		#N/A		#N/A	#REF!	#REF!	1	1	1	1	1	1	1	1	1	1	1	1	1	1	1	1	1	1	1	1	1	1	1	1	1	1	1	1	1	0.08	0	0	0.08	0	0.06	0	0.06	0	0.06
	32	Fiorentino 2016	Project management	Exploitation		#N/A		#N/A	#REF!	#REF!	1	1	1	1	1	1	1	1	1	1	1	1	1	1	0	1	1	1	0	1	1	1	0	1	1	1	1	1	1	0.08	0	0	0.08	0	0.06	0	0.06	0	0.06
	36	Hakim et al. 2016	Project management	Exploitation		#N/A		#N/A	#REF!	#REF!	1	1	1	1	1	1	1	1	1	1	1	1	1	1	1	1	1	1	1	1	1	1	1	1	1	1	1	1	1	0.08	0	0	0.08	0	0.06	0	0.06	0	0.06
	52	Lavikka et al. 2015	Project management	Exploitation		#N/A		#N/A	#REF!	#REF!	1	1	1	1	1	1	1	1	1	1	1	1	1	1	0	1	1	1	1	1	1	1	1	1	1	1	1	1	1	0.08	0	0	0.08	0	0.06	0	0.06	0	0.06
	53	Lehnert et al. 2014*	Project management	Exploitation		#N/A		#N/A	#REF!	#REF!	1	1	1	1	1	1	1	1	1	1	1	1	1	0	1	0	1	0	1	1	1	1	0	1	1	1	1	1	1	0.08	0	0	0.08	0	0.06	0	0.06	0	0.06
	54	Lehnert et al. 2018*	Project management	Exploitation		#N/A		#N/A	#REF!	#REF!	1	0	1	1	1	1	1	1	1	1	0	1	1	1	0	1	1	1	0	1	1	1	1	0	1	1	1	1	0	0.08	0	0	0.08	0	0.06	0	0.06	0	0.06
	58	Linhart et al. 2015a*	Project management	Exploitation		#N/A		#N/A	#REF!	#REF!	1	0	1	1	0	1	1	1	1	1	1	1	1	1	0	1	1	1	0	0	1	1	1	0	1	1	1	1	0	0.08	0	0	0.08	0	0.06	0	0.06	0	0.06
	59	Linhart et al. 2015b	Project management	Exploitation		#N/A		#N/A	#REF!	#REF!	1	0	0	1	0	1	1	1	1	1	0	1	1	1	0	0	1	0	0	1	1	1	1	0	1	1	1	1	0	0.08	0	0	0.08	0	0.06	0	0.06	0	0.06
	65	Manderscheid et al. 2015*	Project management	Exploitation		#N/A		#N/A	#REF!	#REF!	1	0	0	0	1	1	1	1	1	1	1	0	1	1	1	0	1	1	1	1	1	1	1	1	1	1	1	0	1	0.08	0	0	0	0	0.06	0	0.06	0	0.06
	82	Rocha et al. 2015	Project management	Exploitation		#N/A		#N/A	#REF!	#REF!	1	0	0	1	1	1	1	1	1	1	0	1	1	1	0	1	1	1	0	1	1	1	1	0	1	1	1	1	0	0.08	0	0	0.08	0	0.06	0	0.06	0	0.06
	103	CAMAS Method*	Project management	Exploitation							0	1	0	1	1	1	1	1	1	1	1	1	0	1	0	1	1	1	1	1	1	1	1	0	1	1	1	1	1	0	0	0	0.08	0	0.06	0	0.06	0	0.06
	5	Appel et al. 2014	Design	Exploration		#N/A		#N/A	#REF!	#REF!	1	1	1	1	1	1	1	1	1	1	1	1	0	1	1	1	1	1	1	1	1	1	1	1	1	1	1	1	1	0.08	0	0	0.08	0	0.06	0	0.06	0	0.06
	38	Heinrich and Schön 2015*	Design	Exploration							1	1	1	1	1	1	0	1	0	1	1	1	1	1	1	1	1	1	1	1	1	1	0	1	1	1	1	1	1	0.08	0	0	0.08	0	0.06	0	0.06	0	0.06
	50	La Rosa et al. 2015*	Design	Exploration							1	0	1	1	0	1	0	1	0	1	1	1	1	1	0	1	1	1	0	0	1	1	0	0	1	1	1	1	0	0.08	0	0	0.08	0	0.06	0	0.06	0	0.06
	84	Ruiz et al. 2015	Design	Exploration		#N/A		#N/A	#REF!	#REF!	1	1	1	1	1	1	1	1	1	1	1	1	1	1	1	1	1	1	1	1	1	1	1	1	1	1	1	1	1	0.08	0	0	0.08	0	0.06	0	0.06	0	0.06
	57	Lindman et al. 2016	Implementation	Exploration		#N/A		#N/A	#REF!	#REF!	1	0	0	1	1	1	1	1	1	1	1	1	1	1	1	1	1	1	1	1	1	1	1	1	1	0	1	0	1	0.08	0	0	0.08	0	0.06	0	0.06	0	0.06
	95	Trkman et al. 2015	Implementation	Exploration		#N/A		#N/A	#REF!	#REF!	1	0	0	1	1	1	1	1	1	1	1	1	1	0	1	1	1	1	1	1	1	1	1	1	1	1	1	1	1	0.08	0	0	0.08	0	0.06	0	0.06	0	0.06
	94	Teinemaa et al. 2016*	Monitoring	Exploration		#N/A		#N/A	#REF!	#REF!	1	0	1	1	0	1	1	1	1	1	1	1	1	1	0	1	1	1	0	1	1	1	1	0	1	1	1	1	1	0.08	0	0	0.08	0	0.06	0	0.06	0	0.06
	38	Heinrich and Schön 2015*	Improvement and innovation	Exploration							1	1	1	1	1	1	0	1	0	1	1	1	1	1	1	1	1	1	1	1	1	1	0	1	1	1	1	1	1	0.08	0	0	0.08	0	0.06	0	0.06	0	0.06
	94	Teinemaa et al. 2016*	Improvement and innovation	Exploration		#N/A		#N/A	#REF!	#REF!	1	0	1	1	0	1	1	1	1	1	1	1	1	1	0	1	1	1	0	1	1	1	1	0	1	1	1	1	1	0.08	0	0	0.08	0	0.06	0	0.06	0	0.06
	*	BPM method assessed by original BPM method engineer
[truncated: 22 more columns]
